# Supplementary material for: Metabolic dyshomeostasis induced by SARS-CoV-2 structural proteins reveals immunological insights into viral olfactory interactions
Source: Front Immunol. 2022 Sep 8;13:866564. doi: 10.3389/fimmu.2022.866564 (PMC9492993; doi:10.3389/fimmu.2022.866564)
Supplement: Supplementary Table 5 — Top-20 most significant disrupted pathways. Enrichment and heatmap [file Table_5.xlsx]

## Sheet: Annotation
Gene	original_id	E_PROTEOME	E_TRANSCRIPT	M_PROTEOME	M_TRANSCRIPT	N_PROTEOME	N_TRANSCRIPT	S_PROTEOME	S_TRANSCRIPT	R-HSA-1474244 Extracellular matrix organizat	R-HSA-8868773 rRNA processing in the nucleus	R-HSA-9675108 Nervous system development	R-HSA-9006934 Signaling by Receptor Tyrosine	R-HSA-9012999 RHO GTPase cycle	R-HSA-109582 Hemostasis	R-HSA-2262752 Cellular responses to stress	R-HSA-6798695 Neutrophil degranulation	R-HSA-71387 Metabolism of carbohydrates	R-HSA-556833 Metabolism of lipids	R-HSA-3000171 Non-integrin membrane-ECM inte	R-HSA-1280215 Cytokine Signaling in Immune s	R-HSA-5653656 Vesicle-mediated transport	R-HSA-1566948 Elastic fibre formation	R-HSA-381426 Regulation of Insulin-like Gro	R-HSA-163200 Respiratory electron transport	R-HSA-8948216 Collagen chain trimerization	R-HSA-191273 Cholesterol biosynthesis	R-HSA-5663202 Diseases of signal transductio	R-HSA-397014 Muscle contraction	TotalEvidenceCount
55268	Echdc2	1	1	1	1	1	1	1	1	0	0	0	0	0	0	0	0	0	0	0	0	0	0	0	0	0	0	0	0	0
949	Scarb1	1	1	1	1	1	1	1	1	0	0	0	0	0	0	0	0	0	0	0	0	1	0	0	0	1	0	0	0	0
2171	Fabp5	1	1	1	1	1	1	1	1	0	0	0	0	0	0	0	1	0	1	0	0	0	0	0	0	0	0	0	0	0
11117	Emilin1	1	1	1	1	1	1	1	1	1	0	0	0	0	0	0	0	0	0	0	0	0	1	0	0	0	0	0	0	0
60681	Fkbp10	1	1	1	1	1	1	1	1	0	0	0	0	0	0	0	0	0	0	0	0	0	0	0	0	0	0	0	0	0
8653	Ddx3y	1	1	1	1	1	1	0	1	0	0	0	0	0	0	0	0	0	0	0	0	0	0	0	0	0	0	0	0	0
9373	Plaa	1	1	1	1	1	0	1	1	0	0	0	0	0	0	0	0	0	0	0	0	0	0	0	0	0	0	0	0	0
6342	Scp2	1	1	1	1	1	0	1	1	0	0	0	0	0	0	0	0	0	1	0	0	0	0	0	0	0	1	0	0	0
2318	Flnc	1	1	1	1	1	0	1	1	0	0	0	0	0	0	0	0	0	0	0	0	0	0	0	0	0	0	0	0	0
1629	Dbt	1	1	1	1	1	0	1	1	0	1	0	0	1	0	0	0	0	0	0	0	0	0	0	0	0	0	0	0	0
10890	Rab10	1	1	1	1	1	0	1	1	0	0	0	0	0	0	0	1	0	0	0	0	1	0	0	0	0	0	0	0	0
5239	Pgm5	1	1	1	1	1	0	1	1	0	0	0	0	0	0	0	0	0	0	0	0	0	0	0	0	0	0	0	0	0
23022	Palld	1	1	1	1	1	1	0	1	0	0	0	0	0	0	0	0	0	0	0	0	0	0	0	0	0	0	0	0	0
22949	Ptgr1	1	1	1	1	1	0	1	1	0	0	0	0	0	0	0	0	0	1	0	0	0	0	0	0	0	0	0	0	0
1528	Cyb5a	1	1	1	1	1	0	1	1	0	0	0	0	0	0	0	0	0	0	0	0	0	0	0	0	0	0	0	0	0
1968	Eif2s3x;Eif2s3y	1	1	1	1	1	1	0	1	0	1	0	0	0	0	1	0	0	0	0	0	0	0	0	0	0	0	0	0	0
205	Ak4	1	1	1	1	1	0	1	1	0	0	0	0	0	0	0	0	0	0	0	0	0	0	0	0	0	0	0	0	0
5236	Pgm1	1	1	1	1	1	0	1	1	0	0	0	0	0	0	0	1	1	0	0	0	0	0	0	0	0	0	0	0	0
210	Alad	1	1	1	1	1	0	1	1	0	0	0	0	0	0	0	1	0	0	0	0	0	0	0	0	0	0	0	0	0
56925	Lxn	1	0	1	1	1	0	1	1	0	0	0	0	0	0	0	0	0	0	0	0	0	0	0	0	0	0	0	0	0
7791	Zyx	1	1	1	1	1	0	0	1	0	0	0	0	0	0	0	0	0	0	0	0	0	0	0	0	0	0	0	0	0
3958	Lgals3	1	1	1	1	1	0	1	0	0	0	0	0	0	0	0	1	0	0	0	0	0	0	0	0	0	0	0	0	0
218	Aldh3a1	1	1	1	1	1	0	1	0	0	0	0	0	0	0	0	0	0	0	0	0	0	0	0	0	0	0	0	0	0
10226	Plin3	1	1	1	1	1	0	1	0	0	0	0	0	1	0	0	0	0	1	0	0	1	0	0	0	0	0	0	0	0
10609	P3h4	1	1	0	1	1	1	0	1	0	0	0	0	0	0	0	0	0	0	0	0	0	0	0	0	0	0	0	0	0
1277	Col1a1	1	1	0	1	1	1	1	0	1	0	0	1	0	1	0	0	0	0	1	0	1	0	0	0	1	0	0	0	0
481	Atp1b1	1	1	0	1	1	1	0	1	0	0	0	0	0	1	0	0	0	0	0	0	0	0	0	0	0	0	0	1	0
3074	Hexb	1	0	1	1	1	0	1	1	0	0	0	0	0	0	0	1	1	1	0	0	0	0	0	0	0	0	0	0	0
9260	Pdlim7	1	1	1	1	1	0	0	1	0	0	1	0	0	0	0	0	0	0	0	0	0	0	0	0	0	0	0	0	0
7168	Tpm1	1	1	1	1	1	0	1	0	0	0	0	0	0	0	0	0	0	0	0	0	0	0	0	0	0	0	0	1	0
4684	Ncam1	1	1	1	1	1	0	0	1	1	0	1	0	0	0	0	0	0	0	1	1	0	0	0	0	0	0	1	0	0
1289	Col5a1	1	1	0	1	1	1	0	1	1	0	1	1	0	0	0	0	0	0	1	0	0	0	0	0	1	0	0	0	0
91373	Uap1l1	1	1	1	1	1	0	1	0	0	0	0	0	0	0	0	0	0	0	0	0	0	0	0	0	0	0	0	0	0
1278	Col1a2	1	1	0	0	1	1	1	1	1	0	0	1	0	1	0	0	0	0	1	1	1	0	0	0	1	0	0	0	0
51603	EEF1AKNMT;Eef1aknmt	1	1	1	1	1	0	1	0	0	0	0	0	0	0	0	0	0	0	0	0	0	0	0	0	0	0	0	0	0
10631	Postn	0	1	1	1	1	1	0	1	0	0	0	0	0	0	0	0	0	0	0	0	0	0	0	0	0	0	0	0	0
7057	Thbs1	1	1	0	1	1	1	0	1	1	0	0	1	0	1	0	0	0	0	1	0	0	0	0	0	0	0	0	0	0
4628	Myh10	1	1	0	1	1	1	0	1	0	0	1	0	1	0	0	0	0	0	0	0	0	0	0	0	0	0	0	0	0
1595	Cyp51;Cyp51a1	1	1	1	1	1	1	0	0	0	0	1	0	0	0	0	0	0	1	0	0	0	0	0	0	0	1	0	0	0
9805	Scrn1	1	0	1	0	1	0	1	1	0	0	0	0	0	0	0	0	0	0	0	0	0	0	0	0	0	0	0	0	0
4835	Nqo2	1	1	1	0	1	0	1	0	0	0	0	0	0	0	0	0	0	0	0	0	0	0	0	0	0	0	0	0	0
1303	Col12a1	0	1	1	1	0	1	0	1	1	0	0	0	0	0	0	0	0	0	0	0	0	0	0	0	1	0	0	0	0
7184	Hsp90b1	0	1	0	1	1	0	1	1	0	0	0	0	0	0	1	0	0	0	0	1	1	0	1	0	1	0	0	0	0
307	Anxa4	1	0	1	0	1	0	1	1	0	0	0	0	0	0	0	0	0	0	0	0	0	0	0	0	0	0	0	0	0
3490	Igfbp7	0	1	0	1	1	0	1	1	0	0	0	0	0	0	1	0	0	0	0	0	0	0	1	0	0	0	0	0	0
10409	Basp1	1	1	1	1	0	0	1	0	0	0	0	0	1	0	0	0	0	0	0	0	0	0	0	0	0	0	0	0	0
1290	Col5a2	1	1	0	1	1	1	0	0	1	0	1	1	0	0	0	0	0	0	1	0	0	0	0	0	1	0	0	0	0
1728	Nqo1	1	1	1	1	1	0	0	0	0	1	0	0	0	0	0	0	0	0	0	0	0	0	0	0	0	0	0	0	0
54987	Czib	1	0	1	0	1	0	1	1	0	0	0	0	0	0	0	0	0	0	0	0	0	0	0	0	0	0	0	0	0
4507	Mtap	1	0	1	0	1	0	1	1	0	1	0	0	0	0	0	0	0	0	0	1	0	0	0	0	0	0	0	0	0
1759	Dnm1	1	1	1	1	1	0	0	0	0	0	1	1	0	0	0	0	0	0	0	0	1	0	0	0	0	0	0	0	0
27101	Cacybp	1	1	0	1	1	0	1	0	0	0	0	0	0	0	0	0	0	0	0	0	0	0	0	0	0	0	0	0	0
55341	Lsg1	1	0	1	1	1	0	1	0	0	0	0	0	0	0	0	0	0	0	0	0	0	0	0	0	0	0	0	0	0
115024	Nt5c3b	0	1	0	1	1	0	1	1	0	0	0	0	0	0	0	0	0	0	0	0	0	0	0	0	0	0	0	0	0
857	Cav1	1	0	1	0	1	0	1	1	0	0	0	1	1	1	0	0	0	1	0	0	0	0	0	0	0	0	0	0	0
377677	Ca13;Car13	1	0	1	0	1	0	1	1	0	0	0	0	0	0	0	0	0	0	0	0	0	0	0	0	0	0	0	0	0
2040	Stom	1	0	1	1	1	0	1	0	0	0	0	0	1	0	0	1	0	0	0	0	0	0	0	0	0	0	0	0	0
65108	Marcksl1	1	1	0	1	0	1	0	1	0	0	0	0	0	0	0	0	0	0	0	0	0	0	0	0	0	0	0	0	0
8407	Tagln2	1	1	1	1	1	0	0	0	0	0	0	0	0	1	0	0	0	0	0	0	0	0	0	0	0	0	0	0	0
81932	Hdhd3	1	0	1	0	1	0	1	1	0	0	0	0	0	0	0	0	0	0	0	0	0	0	0	0	0	0	0	0	0
3915	Lamc1	1	1	0	1	1	0	1	0	1	0	1	1	0	0	0	0	0	0	1	0	0	0	1	0	0	0	0	0	0
6624	Fscn1	1	1	0	1	1	0	0	1	0	0	0	0	0	0	0	0	0	0	0	1	0	0	0	0	0	0	0	0	0
84681	Hint2	1	0	1	1	1	0	1	0	0	0	0	0	1	0	0	0	0	0	0	0	0	0	0	0	0	0	0	0	0
5822	Pwp2	0	0	1	1	1	0	1	1	0	1	0	0	0	0	0	0	0	0	0	0	0	0	0	0	0	0	0	0	0
5271	Serpinb8	1	1	1	1	0	0	1	0	0	0	0	0	0	1	0	0	0	0	0	0	0	0	0	0	0	0	0	0	0
80221	Acsf2	0	1	0	1	1	1	0	1	0	0	0	0	0	0	0	0	0	1	0	0	0	0	0	0	0	0	0	0	0
345611	Irgm1	1	1	1	1	1	0	0	0	0	0	0	0	0	0	0	0	0	0	0	0	0	0	0	0	0	0	0	0	0
23180	Rftn1	1	1	0	1	1	0	0	1	0	0	0	0	0	0	0	0	0	0	0	0	0	0	0	0	0	0	0	0	0
1281	Col3a1	0	1	1	0	1	0	1	1	1	0	1	1	0	0	0	0	0	0	1	0	1	0	0	0	1	0	0	0	0
23564	Ddah2	1	0	1	0	1	0	1	1	0	0	0	0	0	0	0	0	0	0	0	0	0	0	0	0	0	0	0	0	0
7372	Umps	1	0	1	1	1	0	1	0	0	0	0	0	0	0	0	0	0	0	0	0	0	0	0	0	0	0	0	0	0
3712	Ivd	0	1	1	1	1	0	0	1	0	0	0	0	0	0	0	0	0	0	0	0	0	0	0	0	0	0	0	0	0
285148	Iah1	1	0	1	1	0	0	1	1	0	0	0	0	0	0	0	0	0	0	0	0	0	0	0	0	0	0	0	0	0
445	Ass1	0	1	1	0	0	1	1	1	0	0	0	0	0	0	0	0	0	0	0	0	0	0	0	0	0	0	0	0	0
79026	Ahnak	1	0	1	0	1	0	1	1	0	0	0	0	0	0	0	0	0	0	0	0	0	0	0	0	0	0	0	0	0
7171	Tpm4	0	1	1	1	0	1	0	1	0	0	0	0	1	0	0	0	0	0	0	0	0	0	0	0	0	0	1	1	0
375056	Mia3	1	1	1	1	1	0	0	0	0	0	0	0	0	0	0	0	0	0	0	0	1	0	1	0	0	0	0	0	0
130271	Plekhh2	0	1	0	1	0	1	0	1	0	0	0	0	0	0	0	0	0	0	0	0	0	0	0	0	0	0	0	0	0
114991	Zfp618	0	1	0	1	0	1	0	1	0	0	0	0	0	0	0	0	0	0	0	0	0	0	0	0	0	0	0	0	0
5318	Pkp2	0	1	0	1	0	1	0	1	0	0	0	0	0	0	0	0	0	0	0	0	0	0	0	0	0	0	0	0	0
26007	Tkfc	1	0	1	0	1	0	1	0	0	0	0	0	0	0	0	0	1	0	0	0	0	0	0	0	0	0	0	0	0
8284	Kdm5d	0	1	0	1	0	1	0	1	0	0	0	0	0	0	0	0	0	0	0	0	0	0	0	0	0	0	0	0	0
56926	Ncln	1	1	1	1	0	0	0	0	0	0	0	0	0	0	0	0	0	0	0	0	0	0	0	0	0	0	0	0	0
983	E030030I06Rik;Cdk1	1	1	0	0	1	0	1	0	0	0	0	0	0	0	0	0	0	0	0	0	0	0	0	0	0	0	1	0	0
83854	Angptl6	0	1	0	1	0	1	0	1	0	0	0	0	0	0	0	0	0	0	0	0	0	0	0	0	0	0	0	0	0
771	Car12	0	1	0	1	0	1	0	1	0	0	0	0	0	0	0	0	0	0	0	0	0	0	0	0	0	0	0	0	0
5166	Pdk4	0	1	0	1	0	1	0	1	0	0	0	0	0	0	0	0	0	0	0	0	0	0	0	0	0	0	0	0	0
89846	Fgd3	0	1	0	1	0	1	0	1	0	0	0	0	1	0	0	0	0	0	0	0	0	0	0	0	0	0	0	0	0
11259	Filip1l	1	1	0	1	0	0	0	1	0	0	0	0	0	0	0	0	0	0	0	0	0	0	0	0	0	0	0	0	0
7421	Vdr	0	1	0	1	0	1	0	1	0	0	0	0	0	0	0	0	0	1	0	0	0	0	0	0	0	1	0	0	0
11096	Adamts5	0	1	0	1	0	1	0	1	1	0	0	0	0	0	0	0	0	0	0	0	0	0	0	0	0	0	0	0	0
196996	Gramd2	0	1	0	1	0	1	0	1	0	0	0	0	0	0	0	0	0	0	0	0	0	0	0	0	0	0	0	0	0
114788	Csmd3	0	1	0	1	0	1	0	1	0	0	0	0	0	0	0	0	0	0	0	0	0	0	0	0	0	0	0	0	0
4010	Lmx1b	0	1	0	1	0	1	0	1	0	0	0	0	0	0	0	0	0	0	0	0	0	0	0	0	0	0	0	0	0
8038	Adam12	0	1	0	1	0	1	0	1	1	0	0	1	0	0	0	0	0	0	0	0	0	0	0	0	0	0	0	0	0
90135	Btbd6	0	1	0	1	0	1	0	1	0	0	0	0	0	0	0	0	0	0	0	0	0	0	0	0	0	0	0	0	0
387755	Insc	0	1	0	1	0	1	0	1	0	0	0	0	0	0	0	0	0	0	0	0	0	0	0	0	0	0	0	0	0
2115	Etv1	0	1	0	1	0	1	0	1	0	0	0	0	0	0	0	0	0	0	0	0	0	0	0	0	0	0	0	0	0
10493	Vat1	1	0	1	0	1	0	1	0	0	0	0	0	0	0	0	1	0	0	0	0	0	0	0	0	0	0	0	0	0
7358	Ugdh	1	0	1	0	1	0	1	0	0	0	0	0	0	0	0	0	0	0	0	0	0	0	0	0	0	0	0	0	0
23576	Ddah1	1	1	1	1	0	0	0	0	0	0	0	0	0	0	0	0	0	0	0	0	0	0	0	0	0	0	0	0	0
6194	Rps6	1	0	1	1	0	0	0	1	0	1	1	0	0	0	1	0	0	0	0	0	0	0	0	0	0	0	1	0	0
80781	Col18a1	0	0	0	1	1	0	1	1	1	0	0	0	0	0	0	0	0	0	1	0	0	0	0	0	0	0	0	0	0
396	Arhgdia	1	0	1	0	1	0	1	0	0	0	0	0	1	0	0	0	0	0	0	0	0	0	0	0	0	0	0	0	0
79876	Uba5	0	0	0	1	1	0	1	1	0	0	0	0	0	0	0	0	0	0	0	0	0	0	0	0	0	0	0	0	0
79883	Podnl1	0	1	0	1	0	1	0	1	0	0	0	0	0	0	0	0	0	0	0	0	0	0	0	0	0	0	0	0	0
7403	Uty	0	1	0	1	0	1	0	1	0	0	0	0	0	0	0	0	0	0	0	0	0	0	0	0	0	0	0	0	0
55083	Kif26b	0	1	0	1	0	1	0	1	0	0	0	0	0	1	0	0	0	0	0	0	1	0	0	0	0	0	0	0	0
6387	Cxcl12	0	1	0	1	0	1	0	1	0	0	1	1	0	0	0	0	0	0	0	0	0	0	0	0	0	0	0	0	0
4478	Msn	1	1	1	1	0	0	0	0	0	0	1	0	0	0	0	0	0	0	0	1	0	0	0	0	0	0	1	0	0
5774	Ptpn3	0	1	0	1	0	1	0	1	0	0	0	1	0	0	0	0	0	0	0	0	0	0	0	0	0	0	1	0	0
112464	Cavin3	1	0	1	0	1	0	1	0	0	0	0	0	0	0	0	0	0	0	0	0	0	0	0	0	0	0	0	0	0
9745	Zfp536	0	1	0	1	0	1	0	1	0	0	0	0	0	0	0	0	0	0	0	0	0	0	0	0	0	0	0	0	0
5027	P2rx7	0	1	0	1	0	1	0	1	0	0	0	0	0	1	0	0	0	0	0	0	0	0	0	0	0	0	0	0	0
3615	Impdh2	1	0	1	0	1	0	1	0	0	0	0	0	0	0	0	1	0	0	0	0	0	0	0	0	0	0	0	0	0
2273	Fhl1	1	1	0	0	0	1	0	1	0	0	0	0	0	0	0	0	0	0	0	0	0	0	0	0	0	0	0	0	0
1152	Ckb	1	0	1	0	1	0	1	0	0	1	0	0	1	0	0	0	0	0	0	0	0	0	0	0	0	0	0	0	0
25959	Kank2	1	0	1	0	1	0	1	0	0	0	0	0	0	0	0	0	0	0	0	0	0	0	0	0	0	0	0	0	0
284119	Cavin1	1	0	1	0	1	0	1	0	0	0	0	0	1	0	0	0	0	0	0	0	0	0	0	0	0	0	0	0	0
11140	Cdc37	1	0	1	0	1	0	1	0	0	0	0	1	1	0	0	0	0	0	0	0	0	0	0	0	0	0	1	0	0
8436	Cavin2	1	0	1	0	1	0	1	0	0	0	0	0	0	0	0	0	0	0	0	0	0	0	0	0	0	0	0	0	0
84706	Gpt2	1	0	1	0	1	1	0	0	0	1	0	0	0	0	0	0	0	0	0	0	0	0	0	0	0	0	0	0	0
5530	Ppp3ca	1	0	1	0	1	0	1	0	0	0	0	0	0	0	0	0	0	0	0	0	0	0	0	0	0	0	0	0	0
3624	Inhba	0	1	0	1	0	1	0	1	0	0	0	0	0	0	0	0	0	0	0	0	0	0	0	0	0	0	0	0	0
9933	Pum3	1	0	1	0	1	0	1	0	0	0	0	0	0	0	0	0	0	0	0	0	0	0	0	0	0	0	0	0	0
51060	Txndc12	0	1	0	1	0	1	0	1	0	0	0	0	0	0	0	0	0	0	0	0	0	0	0	0	0	0	0	0	0
8323	Fzd6	0	1	0	1	0	1	0	1	0	0	0	0	0	0	0	0	0	0	0	0	0	0	0	0	0	0	1	0	0
5979	Ret	0	1	0	1	0	1	0	1	0	0	1	0	0	0	0	0	0	0	0	0	0	0	0	0	0	0	1	0	0
54505	Dhx29	1	0	1	0	1	0	1	0	0	0	0	0	0	0	0	0	0	0	0	0	0	0	0	0	0	0	0	0	0
55022	Pid1	0	1	0	1	0	1	0	1	0	0	0	0	0	0	0	0	0	0	0	0	0	0	0	0	0	0	0	0	0
23500	Daam2	0	1	0	1	0	1	0	1	0	0	0	0	0	0	0	0	0	0	0	0	0	0	0	0	0	0	0	0	0
55225	Raver2	0	1	0	1	0	1	0	1	0	0	0	0	0	0	0	0	0	0	0	0	0	0	0	0	0	0	0	0	0
85440	Dock7	1	0	0	1	1	0	1	0	0	0	0	1	1	1	0	0	0	0	1	0	0	0	0	0	0	0	0	0	0
3707	Itpkb	0	1	0	1	0	1	0	1	0	0	0	0	0	0	0	0	0	0	0	0	0	0	0	0	0	0	0	0	0
9188	Ddx21	1	0	1	0	1	0	1	0	0	1	0	0	0	0	0	0	0	0	0	0	0	0	0	0	0	0	0	0	0
387763	Gm13889	0	1	0	1	0	1	0	1	0	0	0	0	0	0	0	0	0	0	0	0	0	0	0	0	0	0	0	0	0
4071	Tm4sf1	0	1	0	1	0	1	0	1	0	0	0	0	0	0	0	0	0	0	0	0	0	0	0	0	0	0	0	0	0
30010	Nxph1	0	1	0	1	0	1	0	1	0	0	0	0	0	0	0	0	0	0	0	0	0	0	0	0	0	0	0	0	0
5153	Pde1b	0	1	0	1	0	1	0	1	0	0	0	0	0	1	0	0	0	0	0	0	0	0	0	0	0	0	1	0	0
2770	Gnai1	0	1	0	1	0	1	0	1	0	0	0	0	0	1	0	0	0	0	0	0	0	0	0	0	0	0	0	0	0
3371	Tnc	0	1	0	1	0	1	0	1	1	0	0	0	0	0	0	0	0	0	1	0	0	0	1	0	0	0	0	0	0
9971	Nr1h4	0	1	0	1	0	1	0	1	0	0	0	0	0	0	0	0	0	1	0	0	0	0	0	0	0	1	0	0	0
55559	Haus7	0	1	0	1	0	1	0	1	0	0	0	0	0	0	0	0	0	0	0	0	0	0	0	0	0	0	0	0	0
2048	Ephb2	0	1	0	1	0	1	0	1	0	0	1	0	0	0	0	0	0	0	0	0	0	0	0	0	0	0	0	0	0
10232	Msln	0	1	0	1	0	1	0	1	0	0	0	0	0	0	0	0	0	0	0	0	0	0	1	0	0	0	0	0	0
6281	S100a10	1	0	1	0	1	0	1	0	0	0	0	0	0	1	0	0	0	0	0	0	0	0	0	0	0	0	0	0	0
6446	Sgk1	0	1	0	1	0	1	0	1	0	0	0	1	0	0	0	0	0	0	0	0	0	0	0	0	0	0	0	0	0
55214	P3h2	0	1	0	1	0	1	0	1	1	0	0	0	0	0	0	0	0	0	0	0	0	0	0	0	0	0	0	0	0
131	Adh7	1	0	1	0	1	0	1	0	0	0	0	0	0	0	0	0	0	0	0	0	0	0	0	0	0	0	0	0	0
64077	Lhpp	0	1	0	1	0	1	0	1	0	0	0	0	0	0	0	0	0	0	0	0	0	0	0	0	0	0	0	0	0
5887	Rad23b	0	0	1	0	1	0	1	1	0	0	0	0	0	0	0	0	0	0	0	0	0	0	0	0	0	0	0	0	0
84679	Slc9a7	0	1	0	1	0	1	0	1	0	0	0	0	0	0	0	0	0	0	0	0	0	0	0	0	0	0	0	0	0
6300	Mapk12	0	1	0	1	0	1	0	1	0	0	1	1	0	0	0	0	0	0	0	0	0	0	0	0	0	0	1	0	0
85460	Zfp518b	0	1	0	1	0	1	0	1	0	0	0	0	0	0	0	0	0	0	0	0	0	0	0	0	0	0	0	0	0
3417	Idh1	1	0	1	0	1	0	1	0	0	0	0	0	0	0	0	1	0	0	0	0	0	0	0	0	0	0	0	0	0
57152	Slurp1	0	1	0	1	0	1	0	1	0	0	0	0	0	0	0	0	0	0	0	0	0	0	0	0	0	0	0	0	0
51380	Csad	1	0	0	1	1	0	1	0	0	1	0	0	0	0	0	0	0	0	0	0	0	0	0	0	0	0	0	0	0
30846	Ehd2	1	0	1	0	1	0	1	0	0	0	0	0	0	1	0	0	0	0	0	0	0	0	0	0	0	0	0	0	0
1906	Edn1	0	1	0	1	0	1	0	1	0	0	0	0	0	0	0	0	0	0	0	0	0	0	0	0	0	0	0	0	0
6576	Slc25a1	1	1	1	1	0	0	0	0	0	0	0	0	0	0	0	0	1	1	0	0	0	0	0	0	0	0	0	0	0
1307	Col16a1	0	1	0	1	0	1	0	1	1	0	0	0	0	0	0	0	0	0	1	0	0	0	0	0	1	0	0	0	0
6734	Srpr;Srpra	1	1	1	0	1	0	0	0	0	1	0	0	0	0	1	0	0	0	0	0	0	0	0	0	0	0	0	0	0
109	Adcy3	0	1	0	1	0	1	0	1	0	0	0	0	0	0	0	0	0	0	0	0	0	0	0	0	0	0	1	0	0
55205	Zfp532	0	1	0	1	0	1	0	1	0	0	0	0	0	0	0	0	0	0	0	0	0	0	0	0	0	0	0	0	0
158219	Ttc39b	1	0	1	0	1	0	1	0	0	0	0	0	0	0	0	0	0	0	0	0	0	0	0	0	0	0	0	0	0
78991	Pcyox1l	1	0	1	0	1	0	1	0	0	0	0	0	0	1	0	0	0	0	0	0	0	0	0	0	0	0	0	0	0
3689	Itgb2	0	1	0	1	0	1	0	1	1	0	0	0	0	1	0	1	0	0	1	1	0	0	0	0	0	0	0	0	0
64094	Smoc2	0	1	0	1	0	1	0	1	0	0	0	0	0	0	0	0	0	0	0	0	0	0	0	0	0	0	0	0	0
5480	Ppic	1	1	0	0	1	0	1	0	0	0	0	0	0	0	0	0	0	0	0	0	0	0	0	0	0	0	0	0	0
10611	Pdlim5	1	1	0	1	0	0	1	0	0	0	0	0	0	0	0	0	0	0	0	0	0	0	0	0	0	0	0	0	0
55512	Smpd3	0	1	0	1	0	1	0	1	0	0	0	0	0	0	0	0	0	1	0	0	0	0	0	0	0	0	0	0	0
114904	C1qtnf6	0	1	0	1	0	1	0	1	0	0	0	0	0	0	0	0	0	0	0	0	0	0	0	0	0	0	0	0	0
10808	Hsph1	1	0	0	0	1	0	1	1	0	0	0	0	0	0	1	0	0	0	0	0	1	0	0	0	0	0	0	0	0
54331	Gng2	0	1	0	1	0	1	0	1	0	0	0	0	0	1	0	0	0	0	0	0	0	0	0	0	0	0	0	0	0
4056	Ltc4s	0	1	0	1	0	1	0	1	0	0	0	0	0	0	0	0	0	1	0	0	0	0	0	0	0	0	0	0	0
831	Cast	1	0	1	0	1	0	1	0	1	0	0	0	0	0	0	0	0	0	0	0	0	0	0	0	0	0	0	0	0
2949	Gstm1	1	0	1	0	1	0	1	0	0	0	0	0	0	0	0	0	0	0	0	0	0	0	0	0	0	0	0	0	0
27042	Utp25	1	0	1	0	1	0	1	0	0	1	0	0	0	0	0	0	0	0	0	0	0	0	0	0	0	0	0	0	0
91624	Nexn	0	1	0	1	0	1	0	1	0	0	0	0	0	0	0	0	0	0	0	0	0	0	0	0	0	0	0	0	0
80018	Naa25	1	0	1	0	1	0	1	0	0	0	0	0	0	0	0	0	0	0	0	0	0	0	0	0	0	0	0	0	0
118	Add1	1	0	1	0	1	0	1	0	0	0	0	0	0	0	1	0	0	0	0	0	0	0	0	0	0	0	0	0	0
81539	Slc38a1	0	1	0	1	0	1	0	1	0	0	0	0	0	0	0	0	0	0	0	0	0	0	0	0	0	0	0	0	0
23406	Cotl1	1	1	0	1	0	0	0	1	0	0	0	0	0	0	0	1	0	0	0	0	0	0	0	0	0	0	0	0	0
27242	Tnfrsf21	0	1	0	1	0	1	0	1	0	0	0	0	0	0	0	0	0	1	0	0	0	0	0	0	0	0	0	0	0
84154	Rpf2	1	0	1	0	1	0	1	0	0	0	0	0	0	0	0	0	0	0	0	0	0	0	0	0	0	0	0	0	0
7570	Zfp422	0	1	0	1	0	1	0	1	0	0	0	0	0	0	0	0	0	0	0	0	0	0	0	0	0	0	0	0	0
10514	Mybbp1a	1	0	1	0	1	0	1	0	0	0	0	0	0	0	0	0	0	0	0	0	0	0	0	0	0	0	0	0	0
23392	Ecpas	1	0	0	0	1	0	1	1	0	0	0	0	0	0	0	0	0	0	0	0	0	0	0	0	0	0	0	0	0
8470	Sorbs2	0	1	0	1	0	1	0	1	0	0	0	0	0	0	0	0	0	0	0	0	0	0	0	0	0	0	0	0	0
4883	Npr3	0	1	0	1	0	1	0	1	0	0	0	0	0	0	0	0	0	0	0	0	0	0	0	0	0	0	0	0	0
3491	Ccn1	0	1	0	1	0	1	0	1	0	0	0	0	0	0	0	0	0	0	0	0	0	0	1	0	0	0	0	0	0
54843	Sytl2	0	1	0	1	0	1	0	1	0	0	0	0	0	0	0	0	0	0	0	0	0	0	0	0	0	0	0	0	0
5269	Serpinb6a	1	0	1	0	1	0	1	0	0	0	0	0	0	1	0	1	0	0	0	0	0	0	0	0	0	0	0	0	0
9955	Hs3st3a1	0	1	0	1	0	1	0	1	0	0	0	0	0	0	0	0	1	0	0	0	0	0	0	0	0	0	0	0	0
7295	Txn;Txn1	1	0	0	0	1	0	1	1	0	0	0	0	0	0	1	0	0	0	0	0	0	0	0	0	0	0	0	0	0
11075	Stmn2	0	1	0	1	0	1	0	1	0	0	0	0	1	0	0	0	0	0	0	0	0	0	0	0	0	0	0	0	0
9486	Chst10	0	1	0	1	0	1	0	1	0	0	0	0	0	0	0	0	0	0	0	0	0	0	0	0	0	0	0	0	0
1288	Col4a6	0	1	0	1	0	1	0	1	1	0	0	0	0	0	0	0	0	0	1	0	0	0	0	0	1	0	0	0	0
529	Atp6v1e1	1	0	1	0	1	0	1	0	0	1	0	1	0	0	1	0	0	0	0	0	0	0	0	0	0	0	0	0	0
54472	Tollip	1	0	1	0	1	0	1	0	0	0	0	0	0	0	0	1	0	0	0	1	0	0	0	0	0	0	0	0	0
6345	Srl	0	1	0	1	0	1	0	1	0	0	0	0	0	0	0	0	0	0	0	0	0	0	0	0	0	0	0	0	0
2512	Ftl1	1	0	1	0	1	0	1	0	0	0	0	0	0	0	0	1	0	0	0	0	1	0	0	0	0	0	0	0	0
92689	Fam114a1	1	1	1	0	0	0	1	0	0	0	0	0	0	0	0	0	0	0	0	0	0	0	0	0	0	0	0	0	0
353	Aprt	1	0	1	0	1	1	0	0	0	0	0	0	0	0	0	1	0	0	0	0	0	0	0	0	0	0	0	0	0
8935	Skap2	0	1	0	1	0	1	0	1	0	0	0	0	0	0	0	0	0	0	0	0	0	0	0	0	0	0	0	0	0
26585	Grem1	0	1	0	1	0	1	0	1	0	0	0	0	0	0	0	0	0	0	0	0	0	0	0	0	0	0	0	0	0
51559	Nt5dc3	1	0	1	1	1	0	0	0	0	0	0	0	0	0	0	0	0	0	0	0	0	0	0	0	0	0	0	0	0
4881	Npr1	0	1	0	1	0	1	0	1	0	0	0	0	0	0	0	0	0	0	0	0	0	0	0	0	0	0	0	1	0
1785	Dnm2	1	0	1	0	1	0	1	0	0	0	1	1	0	0	0	0	0	0	0	0	1	0	0	0	0	0	0	0	0
9672	Sdc3	0	1	0	1	0	1	0	1	1	0	0	0	0	1	0	0	1	0	1	0	0	0	0	0	0	0	0	0	0
340533	Nexmif	0	1	0	1	0	1	0	1	0	0	0	0	0	0	0	0	0	0	0	0	0	0	0	0	0	0	0	0	0
23363	Obsl1	1	1	0	1	0	0	0	1	0	0	0	0	0	0	0	0	0	0	0	0	0	0	0	0	0	0	0	0	0
1282	Col4a1	0	1	0	1	0	1	0	1	1	0	1	1	0	0	0	0	0	0	1	0	1	0	0	0	1	0	0	0	0
3037	Has2	0	1	0	1	0	1	0	1	0	0	0	0	0	0	0	0	1	0	0	0	0	0	0	0	0	0	0	0	0
151176	Erfe	0	1	0	1	0	1	0	1	0	0	0	0	0	0	0	0	0	0	0	0	0	0	0	0	0	0	0	0	0
27063	Ankrd1	0	1	0	1	0	1	0	1	0	0	0	0	0	0	0	0	0	1	0	0	0	0	0	0	0	0	0	0	0
85416	Zic5	0	1	0	1	0	1	0	1	0	0	0	0	0	0	0	0	0	0	0	0	0	0	0	0	0	0	0	0	0
55667	Dennd4c	0	1	1	1	0	0	0	1	0	0	0	0	0	0	0	0	0	0	0	0	1	0	0	0	0	0	0	0	0
64121	Rragc	1	0	1	0	1	0	1	0	0	1	0	0	0	0	1	0	0	0	0	0	0	0	0	0	0	0	1	0	0
7984	Arhgef5	0	1	0	1	0	1	0	1	0	0	0	0	1	0	0	0	0	0	0	0	0	0	0	0	0	0	0	0	0
4041	Lrp5	0	1	0	1	0	1	0	1	0	0	0	0	0	0	0	0	0	0	0	0	0	0	0	0	0	0	1	0	0
9469	Chst3	0	1	0	1	0	1	0	1	0	0	0	0	0	0	0	0	1	0	0	0	0	0	0	0	0	0	0	0	0
200014	Cc2d1b	0	1	0	1	0	1	0	1	0	0	0	0	0	0	0	0	0	0	0	0	0	0	0	0	0	0	0	0	0
51031	Glod4	1	0	1	0	1	0	1	0	0	0	0	0	0	0	0	0	0	0	0	0	0	0	0	0	0	0	0	0	0
29766	Tmod3	1	0	1	0	1	0	1	0	0	0	0	0	1	0	0	0	0	0	0	0	0	0	0	0	0	0	0	1	0
23176	Septin8	1	0	1	0	1	0	1	0	0	0	0	0	0	0	0	0	0	0	0	0	0	0	0	0	0	0	0	0	0
1852	Dusp9	0	1	0	1	0	1	0	1	0	0	0	0	0	0	0	0	0	0	0	0	0	0	0	0	0	0	1	0	0
4361	Mre11	1	0	1	0	1	0	1	0	0	0	0	0	0	0	1	0	0	0	0	0	0	0	0	0	0	0	0	0	0
7052	Tgm2	1	0	1	0	1	0	1	0	0	0	0	0	0	0	0	0	0	0	0	0	0	0	0	0	0	0	0	0	0
2824	Gpm6b	0	1	0	1	0	1	0	1	0	0	0	0	0	0	0	0	0	0	0	0	0	0	0	0	0	0	0	0	0
367	Ar	0	1	0	1	0	1	0	1	0	0	0	0	1	0	1	0	0	0	0	0	0	0	0	0	0	0	0	0	0
10413	Yap1	1	0	1	0	1	0	1	0	0	0	1	1	0	0	0	0	0	0	0	0	0	0	0	0	0	0	0	0	0
84365	Nifk	0	0	1	1	1	0	1	0	0	0	0	0	0	0	0	0	0	0	0	0	0	0	0	0	0	0	0	0	0
4598	Mvk	1	1	0	1	0	0	1	0	0	0	0	0	0	0	0	0	0	1	0	0	0	0	0	0	0	1	0	0	0
7373	Col14a1	0	1	0	1	0	1	0	1	1	0	0	0	0	0	0	0	0	0	0	0	0	0	0	0	1	0	0	0	0
50507	Nox4	0	1	0	1	0	1	0	1	0	0	0	0	0	0	1	0	0	0	0	0	0	0	0	0	0	0	1	0	0
302	Anxa2	1	0	1	0	1	0	1	0	0	0	0	0	0	1	0	1	0	0	0	1	0	0	0	0	0	0	0	1	0
5464	Ppa1	1	0	1	1	1	0	0	0	0	1	0	0	0	0	0	0	0	0	0	0	0	0	0	0	0	0	0	0	0
1490	Ccn2	0	1	0	1	0	1	0	1	0	0	0	0	0	0	0	0	0	0	0	0	0	0	0	0	0	0	0	0	0
27095	Trappc3	1	0	1	0	1	0	1	0	0	0	0	0	0	0	0	0	0	0	0	0	1	0	0	0	0	0	0	0	0
81855	Sfxn3	1	0	1	0	1	0	1	0	0	0	0	0	0	0	0	0	0	0	0	0	0	0	0	0	0	0	0	0	0
4061	Ly6e	0	1	0	1	0	1	0	1	0	0	0	0	0	0	0	0	0	0	0	0	0	0	0	0	0	0	0	0	0
10607	Tbl3	0	0	1	1	1	0	1	0	0	1	0	0	0	0	0	0	0	0	0	0	0	0	0	0	0	0	0	0	0
2184	Fah	1	0	1	0	1	0	0	1	0	1	0	0	0	0	0	0	0	0	0	0	0	0	0	0	0	0	0	0	0
6480	St6gal1	0	1	0	1	0	1	0	1	0	0	0	0	0	0	0	0	0	0	0	0	0	0	0	0	0	0	0	0	0
22874	Plekha6	0	1	0	1	0	1	0	1	0	0	0	0	0	0	0	0	0	1	0	0	0	0	0	0	0	0	0	0	0
8886	Ddx18	1	0	1	0	1	0	1	0	0	0	0	0	0	0	0	0	0	0	0	0	0	0	0	0	0	0	0	0	0
128240	Naxe	1	0	1	0	1	0	1	0	0	0	0	0	0	0	0	0	0	0	0	0	0	0	0	0	0	0	0	0	0
11034	Dstn	1	1	1	1	0	0	0	0	0	0	0	0	0	0	0	0	0	0	0	0	0	0	0	0	0	0	0	0	0
6284	S100a13	1	0	1	0	1	0	1	0	0	0	0	0	0	0	0	0	0	0	0	0	0	0	0	0	0	0	0	0	0
157285	Prag1	0	1	0	1	0	1	0	1	0	0	0	0	1	0	0	0	0	0	0	0	0	0	0	0	0	0	0	0	0
774	Cacna1b	0	1	0	1	0	1	0	1	0	0	0	0	0	0	0	0	0	0	0	0	0	0	0	0	0	0	0	0	0
50865	Hebp1	1	0	1	0	1	0	1	0	0	0	0	0	0	0	0	0	0	0	0	0	0	0	0	0	0	0	0	0	0
9875	Urb1	1	0	1	0	0	0	1	1	0	0	0	0	0	0	0	0	0	0	0	0	0	0	0	0	0	0	0	0	0
5908	Rap1b	1	1	1	1	0	0	0	0	0	0	0	1	0	1	0	1	0	0	1	1	0	0	0	0	0	0	1	0	0
7498	Xdh	0	1	0	1	0	1	0	1	0	0	0	0	0	0	0	0	0	0	0	0	0	0	0	0	0	0	0	0	0
9586	Creb5	0	1	0	1	0	1	0	1	0	0	0	0	0	0	0	0	0	0	0	0	0	0	0	0	0	0	0	0	0
2297	Foxd1	0	1	0	1	0	1	0	1	0	0	0	0	0	0	0	0	0	0	0	0	0	0	0	0	0	0	0	0	0
197259	Mlkl	0	1	0	1	0	1	0	1	0	0	0	0	0	0	0	0	0	0	0	0	0	0	0	0	0	0	0	0	0
355	Fas	0	1	0	1	0	1	0	1	0	0	0	0	0	0	0	0	0	0	0	0	0	0	0	0	0	0	0	0	0
874	Cbr3	0	0	1	1	0	0	1	1	0	0	0	0	0	0	0	0	0	0	0	0	0	0	0	0	0	0	0	0	0
9891	Nuak1	0	1	0	1	0	1	0	1	0	0	0	0	0	0	0	0	0	0	0	0	0	0	0	0	0	0	0	0	0
4647	Myo7a	0	1	0	1	0	1	0	1	0	0	0	0	0	0	0	0	0	0	0	0	0	0	0	0	0	0	0	0	0
7351	Ucp2	0	1	0	1	0	1	0	1	0	0	0	0	0	0	0	0	0	0	0	0	0	0	0	0	0	0	0	0	0
84861	Klhl22	0	1	0	1	0	1	0	1	0	0	0	0	0	0	0	0	0	0	0	0	0	0	0	0	0	0	0	0	0
374986	Miga1	0	1	0	1	0	1	0	1	0	0	0	0	0	0	0	0	0	1	0	0	0	0	0	0	0	0	0	0	0
6050	Rnh1	1	0	1	0	1	0	1	0	0	0	0	0	0	0	0	0	0	0	0	0	0	0	0	0	0	0	0	0	0
822	Capg	1	0	1	0	1	0	1	0	0	0	0	0	0	0	0	0	0	0	0	0	0	0	0	0	0	0	0	0	0
79890	Rin3	0	1	0	1	0	1	0	1	0	0	0	0	0	0	0	0	0	0	0	0	1	0	0	0	0	0	0	0	0
100271927	Rasa4	0	1	0	1	0	1	0	1	0	0	0	0	0	0	0	0	0	0	0	0	0	0	0	0	0	0	0	0	0
113146	Ahnak2	1	0	1	0	1	0	1	0	0	0	0	0	0	0	0	0	0	0	0	0	0	0	0	0	0	0	0	0	0
133022	Tram1l1	0	1	0	1	0	1	0	1	0	0	0	0	0	0	0	0	0	0	0	0	0	0	0	0	0	0	0	0	0
1284	Col4a2	0	1	0	1	0	1	0	1	1	0	1	1	0	0	0	0	0	0	1	0	1	0	0	0	1	0	0	0	0
50814	Nsdhl	0	1	1	1	0	0	1	0	0	0	0	0	0	0	0	0	0	1	0	0	0	0	0	0	0	1	0	0	0
2887	Grb10	0	1	0	1	0	1	0	1	0	0	1	1	0	0	1	0	0	0	0	1	0	0	0	0	0	0	0	0	0
9372	Zfyve9	0	1	0	1	0	1	0	1	0	0	0	0	0	0	0	0	0	0	0	0	0	0	0	0	0	0	1	0	0
7873	Manf	0	1	0	1	0	0	1	1	0	0	0	0	0	1	0	0	0	0	0	0	0	0	0	0	0	0	0	0	0
11240	Padi2	0	1	0	1	0	1	0	1	0	0	0	0	0	0	0	1	0	0	0	0	0	0	0	0	0	0	0	0	0
871	Serpinh1	1	1	0	0	1	1	0	0	1	0	0	0	0	0	0	0	0	0	0	0	0	0	0	0	0	0	0	0	0
79772	Mctp1	0	1	0	1	0	1	0	1	0	0	0	0	0	0	0	0	0	0	0	0	0	0	0	0	0	0	0	0	0
100133941	Cd24a	0	1	0	1	0	1	0	1	0	0	1	0	0	0	0	0	0	0	0	0	0	0	0	0	0	0	0	0	0
64756	Atpaf1	0	1	0	1	0	1	0	1	0	0	0	0	0	0	0	0	0	0	0	0	0	0	0	0	0	0	0	0	0
4692	Ndn	0	1	0	1	0	1	0	1	0	0	0	0	0	0	0	0	0	0	0	1	0	0	0	0	0	0	0	0	0
811	Calr	0	1	0	1	0	0	1	1	0	0	0	0	0	0	1	0	0	0	0	0	1	0	0	0	1	0	0	0	0
19	Abca1	0	1	0	1	0	1	0	1	0	0	0	0	0	0	0	0	0	1	0	0	0	0	0	0	0	0	0	0	0
10669	Cgref1	0	1	0	1	0	1	0	1	0	0	0	0	0	0	0	0	0	0	0	0	0	0	0	0	0	0	0	0	0
26156	Rsl1d1	1	0	1	0	1	0	1	0	0	0	0	0	0	0	0	0	0	0	0	0	0	0	0	0	0	0	0	0	0
1066	Ces2g;Ces1g	0	1	0	1	0	1	0	1	0	0	0	0	0	0	0	0	0	0	0	0	0	0	0	0	0	0	0	0	0
339366	Adamtsl5	0	1	0	1	0	1	0	1	0	0	0	0	0	0	0	0	0	0	0	0	0	0	0	0	0	0	0	0	0
7424	Vegfc	0	1	0	1	0	1	0	1	0	0	0	1	0	1	0	0	0	0	0	0	0	0	0	0	0	0	0	0	0
10023	Peg12	0	1	0	1	0	1	0	1	0	0	0	0	0	0	0	0	0	0	0	0	0	0	0	0	0	0	0	0	0
10970	Ckap4	1	1	1	1	0	0	0	0	0	0	0	0	1	0	0	1	0	0	0	0	0	0	1	0	0	0	0	0	0
2990	Gusb	0	1	0	0	1	0	1	1	0	0	0	0	0	0	0	1	1	0	0	0	0	0	0	0	0	0	0	0	0
11167	Fstl1	1	1	0	1	0	0	0	1	0	0	0	0	0	0	0	0	0	0	0	0	0	0	1	0	0	0	0	0	0
4803	Ngf	0	1	0	1	0	1	0	1	0	0	0	1	0	0	0	0	0	0	0	0	0	0	0	0	0	0	0	0	0
84216	Tmem117	0	1	0	1	0	1	0	1	0	0	0	0	0	0	0	0	0	0	0	0	0	0	0	0	0	0	0	0	0
6876	Tagln	1	1	1	1	0	0	0	0	0	0	0	0	0	0	0	0	0	0	0	0	0	0	0	0	0	0	0	0	0
9415	Fads2	1	1	1	1	0	0	0	0	0	0	0	0	0	0	0	0	0	1	0	0	0	0	0	0	0	0	0	0	0
29929	Alg6	0	1	0	1	0	1	0	1	0	0	0	0	0	0	0	0	0	0	0	0	0	0	0	0	0	0	0	0	0
4013	Vwa5a	1	0	1	0	1	0	1	0	0	0	0	0	0	0	0	0	0	0	0	0	0	0	0	0	0	0	0	0	0
4345	Cd200	0	1	0	1	0	1	0	1	0	0	0	0	0	0	0	0	0	0	0	0	0	0	0	0	0	0	0	0	0
91408	Btf3l4	0	1	0	1	0	1	0	1	0	0	0	0	0	0	0	0	0	0	0	0	0	0	0	0	0	0	0	0	0
4082	Marcks	0	1	1	0	1	0	1	0	0	0	0	0	0	0	0	0	0	0	0	0	0	0	0	0	0	0	0	0	0
633	Bgn	1	0	1	0	1	0	1	0	1	0	0	0	0	0	0	0	1	0	1	0	0	0	0	0	0	0	0	0	0
5054	Serpine1	0	1	0	1	0	1	0	1	1	0	0	0	0	1	0	0	0	0	1	0	0	0	0	0	0	0	0	0	0
7706	Trim25	0	1	0	1	0	1	0	1	0	0	0	0	0	0	0	0	0	0	0	1	0	0	0	0	0	0	0	0	0
255877	Bcl6b	0	1	0	1	0	1	0	1	0	0	0	0	0	0	0	0	0	0	0	0	0	0	0	0	0	0	0	0	0
80114	Bicc1	0	1	0	1	0	1	0	1	0	0	0	0	0	0	0	0	0	0	0	0	0	0	0	0	0	0	0	0	0
7139	Tnnt2	0	1	0	1	0	1	0	1	0	0	0	0	0	0	0	0	0	0	0	0	0	0	0	0	0	0	0	1	0
1291	Col6a1	0	1	0	0	0	1	0	1	1	0	1	1	0	0	0	0	0	0	1	0	0	0	0	0	1	0	0	0	0
92949	Adamtsl1	0	1	0	1	0	0	0	1	0	0	0	0	0	0	0	0	0	0	0	0	0	0	0	0	0	0	0	0	0
7167	Tpi1	1	0	0	0	1	0	1	0	0	0	0	0	0	0	0	0	1	0	0	0	0	0	0	0	0	0	0	0	0
7127	Tnfaip2	0	1	0	1	0	0	0	1	0	0	0	0	0	0	0	0	0	0	0	0	0	0	0	0	0	0	0	0	0
6664	Sox11	0	1	0	1	0	0	0	1	0	0	0	0	0	0	0	0	0	0	0	0	0	0	0	0	0	0	0	0	0
6095	Rora	0	0	0	1	0	1	0	1	0	0	0	0	0	0	1	0	0	1	0	1	0	0	0	0	0	0	0	0	0
1847	Dusp5	0	1	0	1	0	0	0	1	0	0	0	0	0	0	0	0	0	0	0	0	0	0	0	0	0	0	1	0	0
10801	Septin9	1	0	1	0	1	0	0	0	0	0	0	0	0	0	0	0	0	0	0	0	0	0	0	0	0	0	0	0	0
55740	Enah	0	1	0	1	0	0	0	1	0	0	1	0	0	0	0	0	0	0	0	0	0	0	0	0	0	0	0	0	0
55646	Lyar	1	0	1	0	1	0	0	0	0	0	0	0	0	0	0	0	0	0	0	0	0	0	0	0	0	0	0	0	0
23462	Hey1	0	1	0	1	0	0	0	1	0	0	0	0	0	0	0	0	0	0	0	0	0	0	0	0	0	0	1	0	0
1123	Chn1	0	1	0	1	0	0	0	1	0	0	0	0	1	0	0	0	0	0	0	0	0	0	0	0	0	0	0	0	0
5272	Serpinb9;Serpinb9b	0	1	0	0	0	0	1	1	0	0	0	0	0	0	0	0	0	0	0	0	0	0	0	0	0	0	0	0	0
2746	Glud1	1	0	1	0	0	0	1	0	0	1	0	0	0	0	0	0	0	0	0	0	0	0	0	0	0	0	0	0	0
144501	Krt80	0	0	0	1	0	1	0	1	0	0	0	0	0	0	0	0	0	0	0	0	0	0	0	0	0	0	0	0	0
728294	D2hgdh	1	0	1	0	0	0	1	0	0	0	0	0	0	0	0	0	0	0	0	0	0	0	0	1	0	0	0	0	0
285382	2510009E07Rik	0	1	0	1	0	0	0	1	0	0	0	0	0	0	0	0	0	0	0	0	0	0	0	0	0	0	0	0	0
56937	Pmepa1	0	1	0	1	0	0	0	1	0	0	0	0	0	0	0	0	0	0	0	0	0	0	0	0	0	0	0	0	0
26580	Bscl2	0	1	0	1	0	0	0	1	0	0	0	0	0	0	0	0	0	0	0	0	0	0	0	0	0	0	0	0	0
84695	Loxl3	0	1	0	1	0	0	0	1	1	0	0	0	0	0	0	0	0	0	0	0	0	1	0	0	1	0	0	0	0
23275	Pofut2	0	1	0	1	0	0	0	1	0	0	0	0	0	0	0	0	0	0	0	0	0	0	0	0	0	0	0	0	0
9294	S1pr2	0	1	0	1	0	0	0	1	0	0	0	0	0	0	0	0	0	0	0	0	0	0	0	0	0	0	0	0	0
5250	Slc25a3	1	0	1	0	1	0	0	0	0	0	0	0	0	0	0	0	0	0	0	0	0	0	0	0	0	0	0	0	0
3716	Jak1	0	1	0	1	0	0	0	1	0	0	0	0	0	0	0	0	0	0	0	1	0	0	0	0	0	0	1	0	0
56949	Xab2	1	0	0	0	1	0	1	0	0	0	0	0	0	0	0	0	0	0	0	0	0	0	0	0	0	0	0	0	0
5743	Ptgs2	0	1	0	1	0	1	0	0	0	0	0	0	0	0	0	0	0	1	0	1	0	0	0	0	0	0	0	0	0
283208	P4ha3	0	1	0	1	0	1	0	0	1	0	0	0	0	0	0	0	0	0	0	0	0	0	0	0	0	0	0	0	0
81553	Cyria	0	1	0	1	0	0	0	1	0	0	0	0	0	0	0	0	0	0	0	0	0	0	0	0	0	0	0	0	0
9180	Osmr	0	1	0	1	0	0	0	1	0	0	0	0	0	0	0	0	0	0	0	1	0	0	0	0	0	0	0	0	0
654463	Fer1l6	0	1	0	1	0	1	0	0	0	0	0	0	0	0	0	0	0	0	0	0	0	0	0	0	0	0	0	0	0
55076	Tmem45a	0	0	0	1	0	1	0	1	0	0	0	0	0	0	0	0	0	0	0	0	0	0	0	0	0	0	0	0	0
130814	Pqlc3	0	1	0	1	0	0	0	1	0	0	0	0	0	0	0	0	0	0	0	0	0	0	0	0	0	0	0	0	0
606495	Cyb5rl	0	1	0	1	0	0	0	1	0	0	0	0	0	0	0	0	0	0	0	0	0	0	0	0	0	0	0	0	0
8562	Denr	0	1	1	1	0	0	0	0	0	0	0	0	0	0	0	0	0	0	0	0	0	0	0	0	0	0	0	0	0
126321	Mfsd12	0	1	0	1	0	0	0	1	0	0	0	0	0	0	0	0	0	0	0	0	0	0	0	0	0	0	0	0	0
339123	Jmjd8	0	1	0	1	0	0	0	1	0	0	0	0	0	0	0	0	0	0	0	0	0	0	0	0	0	0	0	0	0
83539	Chst9	0	1	0	1	0	0	0	1	0	0	0	0	0	0	0	0	1	0	0	0	0	0	0	0	0	0	0	0	0
3995	Fads3	1	0	1	1	0	0	0	0	0	0	0	0	0	0	0	0	0	0	0	0	0	0	0	0	0	0	0	0	0
221091	Lrrn4cl	0	0	0	1	0	1	0	1	0	0	0	0	0	0	0	0	0	0	0	0	0	0	0	0	0	0	0	0	0
143684	Fam76b	0	0	1	0	1	0	1	0	0	0	0	0	0	0	0	0	0	0	0	0	0	0	0	0	0	0	0	0	0
7066	Thpo	0	1	0	1	0	0	0	1	0	0	0	0	0	1	0	0	0	0	0	0	0	0	0	0	0	0	0	0	0
22856	Chsy1	0	1	0	1	0	0	0	1	0	0	0	0	0	0	0	0	1	0	0	0	0	0	0	0	0	0	0	0	0
79827	Clmp	0	1	0	1	0	0	0	1	0	0	0	0	0	0	0	0	0	0	0	0	0	0	0	0	0	0	0	0	0
7263	Tst	0	0	0	0	1	0	1	1	0	0	0	0	0	0	0	0	0	0	0	0	0	0	0	0	0	0	0	0	0
1499	Ctnnb1	1	0	1	0	0	0	1	0	0	0	0	1	1	0	0	0	0	0	0	0	0	0	0	0	0	0	1	0	0
84950	Prpf38a	0	1	0	1	0	0	0	1	0	0	0	0	0	0	0	0	0	0	0	0	0	0	0	0	0	0	0	0	0
765	Car6	0	1	0	1	0	0	0	1	0	0	0	0	0	0	0	0	0	0	0	0	0	0	0	0	0	0	0	0	0
389206	Bend4	0	1	0	1	0	0	0	1	0	0	0	0	0	0	0	0	0	0	0	0	0	0	0	0	0	0	0	0	0
57708	Mier1	0	1	0	1	0	0	0	1	0	0	0	0	0	0	0	0	0	0	0	0	0	0	0	0	0	0	0	0	0
1491	Cth	1	0	1	0	0	0	1	0	0	1	0	0	0	0	0	0	0	0	0	0	0	0	0	0	0	0	0	0	0
7040	Tgfb1	0	1	0	0	0	1	0	1	1	0	0	0	0	1	0	0	0	0	1	1	0	1	0	0	0	0	1	0	0
2118	Etv4	0	1	0	1	0	1	0	0	0	0	0	0	0	0	0	0	0	0	0	0	0	0	0	0	0	0	1	0	0
3428	Ifi203;Mndal;Ifi204;Ifi207;Ifi211	0	1	0	1	0	1	0	0	0	0	0	0	0	0	0	0	0	0	0	0	0	0	0	0	0	0	0	0	0
9468	Pcyt1b	0	1	0	1	0	0	0	1	0	0	0	0	0	0	0	0	0	1	0	0	0	0	0	0	0	0	0	0	0
7114	Tmsb4x	0	1	0	1	0	1	0	0	0	0	0	0	0	1	0	0	0	0	0	0	0	0	0	0	0	0	0	0	0
51388	Nip7	0	0	1	0	1	0	1	0	0	1	0	0	0	0	0	0	0	0	0	0	0	0	0	0	0	0	0	0	0
80760	Itih5	0	1	0	1	0	0	0	1	0	0	0	0	0	0	0	0	0	0	0	0	0	0	0	0	0	0	0	0	0
6573	Slc19a1	0	1	0	1	0	0	0	1	0	0	0	0	0	0	0	0	0	0	0	0	0	0	0	0	0	0	0	0	0
23212	Rrs1	1	0	1	0	0	0	1	0	0	0	0	0	0	0	0	0	0	0	0	0	0	0	0	0	0	0	0	0	0
7869	Sema3b	0	1	0	1	0	0	0	1	0	0	0	0	0	0	0	0	0	0	0	0	0	0	0	0	0	0	0	0	0
8447	Doc2b	0	1	0	1	0	0	0	1	0	0	0	0	0	0	0	0	0	0	0	0	0	0	0	0	0	0	0	0	0
51643	Tmbim4	0	1	0	1	0	0	0	1	0	0	0	0	0	0	0	0	0	0	0	0	0	0	0	0	0	0	0	0	0
127534	Gjb4	0	1	0	1	0	0	0	1	0	0	0	0	0	0	0	0	0	0	0	0	1	0	0	0	0	0	0	0	0
4982	Tnfrsf11b	0	1	0	1	0	1	0	0	0	0	0	0	0	0	0	0	0	0	0	1	0	0	0	0	0	0	0	0	0
3055	Hck	0	1	0	1	0	1	0	0	0	0	0	0	0	0	0	0	0	0	0	1	0	0	0	0	0	0	0	0	0
5648	Masp1	0	1	0	1	0	1	0	0	0	0	0	0	0	0	0	0	0	0	0	0	1	0	0	0	1	0	0	0	0
9510	Adamts1	0	1	0	1	0	1	0	0	1	0	0	0	0	0	0	0	0	0	0	0	0	0	0	0	0	0	0	0	0
4502	Mt1;Mt2	0	1	0	1	0	0	0	1	0	0	0	0	0	0	1	0	0	0	0	1	0	0	0	0	0	0	0	0	0
54968	Tmem70	0	1	0	1	0	0	0	1	0	0	0	0	0	0	0	0	0	0	0	0	0	0	0	0	0	0	0	0	0
285313	Igsf10	0	1	0	1	0	0	0	1	0	0	0	0	0	0	0	0	0	0	0	0	0	0	0	0	0	0	0	0	0
9497	Slc4a7	1	1	0	1	0	0	0	0	0	0	0	0	1	0	0	0	0	0	0	0	0	0	0	0	0	0	0	0	0
10979	Fermt2	1	1	0	1	0	0	0	0	0	0	0	0	1	0	0	0	0	0	0	0	0	0	0	0	0	0	0	0	0
10728	Ptges3	1	0	1	0	1	0	0	0	0	0	0	0	0	0	1	0	0	1	0	0	0	0	0	0	0	0	0	0	0
2334	Aff2	0	1	0	1	0	1	0	0	0	0	0	0	0	0	0	0	0	0	0	0	0	0	0	0	0	0	0	0	0
84691	Fam71f1	0	1	0	1	0	0	0	1	0	0	0	0	0	0	0	0	0	0	0	0	0	0	0	0	0	0	0	0	0
6472	Shmt2	1	0	1	0	1	0	0	0	0	0	0	0	1	0	0	0	0	0	0	0	0	0	0	0	0	0	0	0	0
58486	Zbed5	0	1	0	0	1	0	0	1	0	0	0	0	0	0	0	0	0	0	0	0	0	0	0	0	0	0	0	0	0
10484	Sec23a	0	1	1	0	0	0	1	0	0	0	0	0	0	0	0	0	0	1	0	0	1	0	0	0	0	0	0	0	0
54492	Neurl1b	0	1	0	1	0	0	0	1	0	0	0	0	0	0	0	0	0	0	0	0	0	0	0	0	0	0	1	0	0
1265	Cnn2	0	1	0	1	0	0	1	0	0	0	0	0	0	0	0	1	0	0	0	1	0	0	0	0	0	0	0	0	0
10043	Tom1	1	0	1	0	0	0	1	0	0	0	0	0	0	0	0	1	0	0	0	0	0	0	0	0	0	0	0	0	0
2629	Gba	1	0	1	0	0	0	1	0	0	0	0	0	0	0	0	0	0	1	0	0	0	0	0	0	0	0	0	0	0
22843	Ppm1e	0	1	0	0	0	1	0	1	0	0	0	0	0	0	0	0	0	0	0	0	0	0	0	0	0	0	0	0	0
25894	Plekhg4	0	1	0	1	0	0	0	1	0	0	0	0	1	0	0	0	0	0	0	0	0	0	0	0	0	0	0	0	0
64900	Lpin3	0	1	0	1	0	0	0	1	0	0	0	0	0	0	0	0	0	1	0	0	0	0	0	0	0	0	0	0	0
4139	Mark1	0	1	0	1	0	0	0	1	0	0	0	0	0	0	0	0	0	0	0	0	0	0	0	0	0	0	0	0	0
6785	Elovl4	0	1	0	1	0	0	0	1	0	0	0	0	0	0	0	0	0	1	0	0	0	0	0	0	0	0	0	0	0
3303	Hspa1a	1	0	1	0	1	0	0	0	0	1	0	0	0	0	1	1	0	0	0	0	0	0	0	0	0	0	0	0	0
51668	Hspb11	0	1	0	1	0	0	0	1	0	0	0	0	0	0	0	0	0	0	0	0	0	0	0	0	0	0	0	0	0
3670	Isl1	0	1	0	1	0	0	0	1	0	0	1	0	0	0	0	0	0	0	0	0	0	0	0	0	0	0	0	0	0
3399	Id3	0	1	0	1	0	1	0	0	0	0	0	1	0	0	0	0	0	0	0	0	0	0	0	0	0	0	0	0	0
348093	Rbpms2	0	1	0	1	0	0	0	1	0	0	0	0	0	0	0	0	0	0	0	0	0	0	0	0	0	0	0	0	0
81792	Adamts12	0	1	0	1	0	0	0	1	0	0	0	0	0	0	0	0	0	0	0	0	0	0	0	0	0	0	0	0	0
51074	Apip	1	0	1	0	0	0	1	0	0	1	0	0	0	0	0	0	0	0	0	0	0	0	0	0	0	0	0	0	0
23057	Nmnat2	0	1	0	1	0	0	0	1	0	0	0	0	0	0	0	0	0	0	0	0	0	0	0	0	0	0	0	0	0
654	Bmp6	0	1	0	1	0	0	0	1	0	0	0	0	0	0	0	0	0	0	0	0	0	0	0	0	0	0	0	0	0
201562	Hacd2	0	1	0	1	0	0	0	1	0	0	0	0	0	0	0	0	0	1	0	0	0	0	0	0	0	0	0	0	0
401474	Samd12	0	1	0	1	0	0	0	1	0	0	0	0	0	0	0	0	0	0	0	0	0	0	0	0	0	0	0	0	0
55856	Acot13	0	0	0	0	1	0	1	1	0	0	0	0	0	0	0	0	0	1	0	0	0	0	0	0	0	0	0	0	0
5155	Pdgfb	0	1	0	1	0	0	0	1	1	0	0	1	0	1	0	0	0	0	1	0	0	0	0	0	0	0	1	0	0
23158	Tbc1d9	0	1	0	1	0	1	0	0	0	0	0	0	0	0	0	0	0	0	0	0	0	0	0	0	0	0	0	0	0
64065	Perp	0	1	0	0	0	1	0	1	0	0	0	0	0	0	0	0	0	0	0	0	0	0	0	0	0	0	0	0	0
79699	Zyg11b	0	1	0	1	0	0	0	1	0	0	0	0	0	0	0	0	0	0	0	0	0	0	0	0	0	0	0	0	0
57050	Utp3	0	0	1	0	1	0	1	0	0	1	0	0	0	0	0	0	0	0	0	0	0	0	0	0	0	0	0	0	0
51479	Ankfy1	1	0	1	0	0	0	1	0	0	0	0	0	1	0	0	0	0	0	0	0	0	0	0	0	0	0	0	0	0
84168	Antxr1	0	1	0	1	0	1	0	0	0	0	0	0	0	0	0	0	0	0	0	0	0	0	0	0	0	0	0	0	0
26191	Ptpn22	0	1	0	1	0	1	0	0	0	0	0	0	0	0	0	0	0	0	0	0	0	0	0	0	0	0	0	0	0
90993	Creb3l1	0	1	0	0	0	1	0	1	0	0	0	0	0	0	1	0	0	0	0	0	0	0	0	0	0	0	0	0	0
1312	Comt	1	0	1	0	1	0	0	0	0	0	0	0	0	0	0	0	0	0	0	0	0	0	0	0	0	0	0	0	0
1654	Ddx3x	1	0	1	0	0	0	1	0	0	0	0	0	0	0	0	1	0	0	0	0	0	0	0	0	0	0	0	0	0
221833	Sp8	0	1	0	1	0	1	0	0	0	0	0	0	0	0	0	0	0	0	0	0	0	0	0	0	0	0	0	0	0
114800	Ccdc85a	0	1	0	1	0	0	0	1	0	0	0	0	0	0	0	0	0	0	0	0	0	0	0	0	0	0	0	0	0
55013	Mcub	0	1	0	1	0	0	0	1	0	0	0	0	0	0	0	0	0	0	0	0	0	0	0	0	0	0	0	0	0
23753	Sdf2l1	0	1	0	1	0	0	0	1	0	0	0	0	0	0	0	0	0	0	0	0	0	0	0	0	0	0	0	0	0
1356	Cp	1	0	0	0	1	0	0	1	0	0	0	0	0	0	0	0	0	0	0	0	0	0	1	0	0	0	0	0	0
1428	Crym	0	1	0	1	0	0	0	1	0	0	0	0	0	0	0	0	0	0	0	0	0	0	0	0	0	0	0	0	0
5742	Ptgs1	0	1	0	1	0	0	0	1	0	0	0	0	0	0	0	0	0	1	0	0	0	0	0	0	0	0	0	0	0
5163	Pdk1	0	1	0	1	0	1	0	0	0	0	0	0	0	0	0	0	0	0	0	0	0	0	0	0	0	0	0	0	0
6615	Snai1	0	1	0	1	0	0	0	1	0	0	0	0	0	0	0	0	0	0	0	0	0	0	0	0	0	0	1	0	0
388662	Slc6a17	0	1	0	1	0	0	0	1	0	0	0	0	0	0	0	0	0	0	0	0	0	0	0	0	0	0	0	0	0
6948	Tcn2	0	0	0	1	0	1	0	1	0	0	0	0	0	0	0	0	0	0	0	0	0	0	0	0	0	0	0	0	0
1850	Dusp8	0	1	0	1	0	1	0	0	0	0	0	0	0	0	0	0	0	0	0	0	0	0	0	0	0	0	1	0	0
7145	Tns1	0	1	0	1	0	1	0	0	0	0	0	0	0	0	0	0	0	0	0	0	0	0	0	0	0	0	0	0	0
83543	Aif1l	0	1	0	1	0	0	0	1	0	0	0	0	0	0	0	0	0	0	0	0	0	0	0	0	0	0	0	0	0
127544	Rnf19b	0	1	0	1	0	0	0	1	0	0	0	0	0	0	0	0	0	0	0	0	0	0	0	0	0	0	0	0	0
7164	Tpd52l1	0	1	0	1	0	1	0	0	0	0	0	0	0	0	0	0	0	0	0	0	1	0	0	0	0	0	0	0	0
7153	Top2a	1	0	1	0	0	0	1	0	0	0	0	0	0	0	0	0	0	0	0	0	0	0	0	0	0	0	0	0	0
23421	Itgb3bp	0	1	0	1	0	0	0	1	0	0	0	0	1	0	0	0	0	0	0	0	0	0	0	0	0	0	0	0	0
5352	Plod2	0	1	1	0	1	0	0	0	1	0	0	0	0	0	0	0	0	0	0	0	0	0	0	0	0	0	0	0	0
221749	Pxdc1	0	1	0	1	0	1	0	0	0	0	0	0	0	0	0	0	0	0	0	0	0	0	0	0	0	0	0	0	0
54762	Gramd1c	0	1	0	1	0	0	0	1	0	0	0	0	0	0	0	0	0	0	0	0	0	0	0	0	0	0	0	0	0
4208	Mef2c	0	1	0	1	0	0	0	1	0	0	0	1	0	0	1	0	0	0	0	1	0	0	0	0	0	0	0	0	0
7006	Tec	0	1	0	1	0	0	0	1	0	0	0	1	0	0	0	0	0	0	0	1	0	0	0	0	0	0	0	0	0
729359	Plin4	0	1	0	1	0	0	0	1	0	0	0	0	0	0	0	0	0	0	0	0	0	0	0	0	0	0	0	0	0
54893	Mtmr10	0	1	0	1	0	0	0	1	0	0	0	0	0	0	0	0	0	1	0	0	0	0	0	0	0	0	0	0	0
64838	Fndc4	0	1	0	1	0	1	0	0	0	0	0	0	0	0	0	0	0	0	0	0	0	0	0	0	0	0	0	0	0
57484	Rnf150	0	1	0	0	0	1	0	1	0	0	0	0	0	0	0	0	0	0	0	0	0	0	0	0	0	0	0	0	0
6482	St3gal1	0	1	0	1	0	0	0	1	0	0	0	0	0	0	0	0	1	0	0	0	0	0	0	0	0	0	0	0	0
23420	Nomo1	1	0	1	0	0	0	1	0	0	0	0	0	0	0	0	0	0	0	0	0	0	0	0	0	0	0	0	0	0
64175	P3h1	0	1	0	0	0	1	0	1	1	0	0	0	0	0	0	0	0	0	0	0	0	0	0	0	0	0	0	0	0
85301	Col27a1	0	1	0	1	0	0	0	1	1	0	0	1	0	0	0	0	0	0	1	0	0	0	0	0	0	0	0	0	0
1318	Slc31a2	0	1	0	1	0	0	0	1	0	0	0	0	0	0	0	0	0	0	0	0	0	0	0	0	0	0	0	0	0
9775	Eif4a3	0	0	0	1	0	0	1	1	0	0	1	0	0	0	0	0	0	0	0	1	0	0	0	0	0	0	0	0	0
5973	Renbp	0	1	0	1	0	0	0	1	0	0	0	0	0	0	0	0	0	0	0	0	0	0	0	0	0	0	0	0	0
80173	Ift74	0	1	0	1	0	0	0	1	0	0	0	0	0	0	0	0	0	0	0	0	0	0	0	0	0	0	0	0	0
388	Rhob	0	1	0	1	0	0	0	1	0	0	1	0	1	1	0	0	0	0	0	0	0	0	0	0	0	0	0	0	0
3695	Itgb7	0	1	0	1	0	1	0	0	1	0	0	0	0	0	0	0	0	0	1	0	0	0	0	0	0	0	0	0	0
84455	Efcab7	0	1	0	1	0	0	0	1	0	0	0	0	0	0	0	0	0	0	0	0	0	0	0	0	0	0	0	0	0
51726	Dnajb11	0	1	0	1	0	0	0	1	0	0	0	0	0	0	1	0	0	0	0	0	0	0	0	0	0	0	0	0	0
10417	Spon2	0	0	0	1	0	1	0	1	0	0	0	0	0	0	0	0	0	0	0	0	0	0	0	0	0	0	0	0	0
288	Ank3	0	1	0	1	0	0	0	1	0	0	1	0	0	0	0	0	0	0	0	0	1	0	0	0	0	0	0	0	0
526	Atp6v1b2	1	0	1	0	0	0	1	0	0	1	0	1	0	0	1	0	0	0	0	0	0	0	0	0	0	0	0	0	0
23169	Slc35d1	0	1	0	1	0	0	0	1	0	0	0	0	0	0	0	0	0	0	0	0	0	0	0	0	0	0	0	0	0
7170	Tpm3	1	0	0	0	1	0	1	0	0	0	0	0	1	0	0	0	0	0	0	0	0	0	0	0	0	0	1	1	0
2355	Fosl2	0	1	0	1	0	0	0	1	0	0	0	0	0	0	0	0	0	0	0	0	0	0	0	0	0	0	0	0	0
1435	Csf1	0	1	0	1	0	1	0	0	0	0	0	0	0	0	0	0	0	0	0	1	0	0	1	0	0	0	0	0	0
2560	Gabrb1	0	1	0	1	0	0	0	1	0	0	0	1	0	0	0	0	0	0	0	0	0	0	0	0	0	0	0	0	0
1723	Dhodh	0	0	0	0	1	0	1	1	0	0	0	0	0	0	0	0	0	0	0	0	0	0	0	0	0	0	0	0	0
115209	Oma1	0	1	0	1	0	0	0	1	0	0	0	0	0	0	0	0	0	0	0	0	0	0	0	0	0	0	0	0	0
7398	Usp1	0	1	0	1	0	0	0	1	0	0	0	0	0	0	0	0	0	0	0	0	0	0	0	0	0	0	0	0	0
60	Actb	0	1	0	1	0	0	0	1	0	0	1	1	1	1	0	0	0	0	0	0	1	0	0	0	0	0	1	0	0
9749	Phactr2	0	1	0	1	0	0	0	1	0	0	0	0	0	1	0	0	0	0	0	0	0	0	0	0	0	0	0	0	0
377007	Klhl30	0	1	0	1	0	0	0	1	0	0	0	0	0	0	0	0	0	0	0	0	0	0	0	0	0	0	0	0	0
4907	Nt5e	0	1	0	1	0	0	0	1	0	0	0	0	0	0	0	0	0	0	0	0	0	0	0	0	0	0	0	0	0
10111	Rad50	1	0	0	0	1	0	1	0	0	0	0	0	0	0	1	0	0	0	0	0	0	0	0	0	0	0	0	0	0
7874	Usp7	0	0	1	0	1	0	1	0	0	0	0	0	0	0	0	0	0	0	0	0	0	0	0	0	0	0	1	0	0
29109	Fhod1	0	1	0	1	0	0	0	1	0	0	0	0	0	0	0	0	0	0	0	0	0	0	0	0	0	0	0	0	0
7832	Btg2	0	1	0	1	0	0	0	1	0	0	0	0	0	0	0	0	0	0	0	0	0	0	0	0	0	0	0	0	0
2562	Gabrb3	0	1	0	1	0	1	0	0	0	0	0	1	0	0	0	0	0	0	0	0	0	0	0	0	0	0	0	0	0
54733	Slc35f2	0	1	0	1	0	0	0	1	0	0	0	0	0	0	0	0	0	0	0	0	0	0	0	0	0	0	0	0	0
226	Aldoa	1	0	1	0	0	0	1	0	0	0	0	0	0	1	0	1	1	0	0	0	0	0	0	0	0	0	0	0	0
23223	Rrp12	1	0	1	0	0	0	1	0	0	0	0	0	0	0	0	0	0	0	0	0	0	0	0	0	0	0	0	0	0
7881	Kcnab1	0	1	0	1	0	0	0	1	0	0	0	0	0	0	0	0	0	0	0	0	0	0	0	0	0	0	0	0	0
6836	Surf4	1	1	1	0	0	0	0	0	0	0	0	0	0	0	0	1	0	0	0	0	1	0	0	0	0	0	0	0	0
26092	Tor1aip1	1	0	1	0	1	0	0	0	0	0	0	0	1	0	0	0	0	0	0	0	0	0	0	0	0	0	0	0	0
8633	Unc5c	0	1	0	1	0	0	0	1	0	0	1	0	0	0	0	0	0	0	0	0	0	0	0	0	0	0	0	0	0
3005	H1f0	0	1	0	1	0	0	0	1	0	0	0	0	0	0	1	0	0	0	0	0	0	0	0	0	0	0	0	0	0
6000	Rgs7	0	1	0	1	0	0	0	1	0	0	0	0	0	0	0	0	0	0	0	0	0	0	0	0	0	0	0	0	0
4857	Nova1	0	1	0	1	0	0	0	1	0	0	0	0	0	0	0	0	0	0	0	0	0	0	0	0	0	0	0	0	0
254427	Proser2	0	1	0	1	0	0	0	1	0	0	0	0	0	0	0	0	0	0	0	0	0	0	0	0	0	0	0	0	0
11278	Klf12	0	1	0	1	0	0	0	1	0	0	0	0	0	0	0	0	0	0	0	0	0	0	0	0	0	0	0	0	0
728113	Anxa8	0	1	0	1	1	0	0	0	0	0	0	0	0	0	0	0	0	0	0	0	0	0	0	0	0	0	0	0	0
4124	Man2a1	0	1	0	1	1	0	0	0	0	0	0	0	0	0	0	0	0	0	0	0	1	0	0	0	0	0	0	0	0
9314	Klf4	0	1	0	1	0	0	0	1	0	0	0	0	0	0	0	0	0	0	0	0	0	0	0	0	0	0	0	0	0
2519	Fuca2	0	1	0	1	0	0	0	1	0	0	0	0	0	0	0	1	0	0	0	0	0	0	1	0	0	0	0	0	0
166336	Prickle2	0	1	0	1	0	0	0	1	0	0	0	0	0	0	0	0	0	0	0	0	0	0	0	0	0	0	0	0	0
5332	Plcb4	0	1	0	1	0	1	0	0	0	0	0	0	0	0	0	0	0	0	0	0	0	0	0	0	0	0	0	0	0
79792	Gsdmd	0	1	0	1	0	1	0	0	0	0	0	0	0	0	0	1	0	0	0	1	0	0	0	0	0	0	0	0	0
56979	Prdm9	0	1	0	1	0	0	0	1	0	0	0	0	0	0	0	0	0	0	0	0	0	0	0	0	0	0	0	0	0
5997	Rgs2	0	1	0	1	0	0	0	1	0	0	0	0	0	0	0	0	0	0	0	0	0	0	0	0	0	0	0	0	0
2247	Fgf2	0	1	0	1	0	0	0	1	1	0	0	1	0	0	0	0	0	0	1	1	0	0	0	0	0	0	1	0	0
4065	Ly75	0	1	0	1	0	0	0	1	0	0	0	0	0	0	0	0	0	0	0	0	0	0	0	0	0	0	0	0	0
467	Atf3	0	1	0	1	0	0	0	1	0	0	0	0	0	0	1	0	0	0	0	0	0	0	0	0	0	0	0	0	0
23166	Stab1	0	1	0	1	0	0	0	1	0	0	0	0	0	0	0	0	0	0	0	0	1	0	0	0	1	0	0	0	0
23246	Bop1	0	0	0	0	1	0	1	1	0	0	0	0	0	0	0	0	0	0	0	0	0	0	0	0	0	0	0	0	0
127435	Podn	0	1	0	1	0	0	0	1	0	0	0	0	0	0	0	0	0	0	0	0	0	0	0	0	0	0	0	0	0
4047	Lss	0	1	0	1	0	0	1	0	0	0	0	0	0	0	0	0	0	1	0	0	0	0	0	0	0	1	0	0	0
57211	Adgrg6	0	1	0	1	0	1	0	0	0	0	1	0	0	0	0	0	0	0	0	0	0	0	0	0	0	0	0	0	0
10090	Ust	0	1	0	1	0	0	0	1	0	0	0	0	0	0	0	0	1	0	0	0	0	0	0	0	0	0	0	0	0
1012	Cdh13	0	1	0	1	0	0	0	1	0	0	0	0	0	0	0	0	0	0	0	0	0	0	0	0	0	0	0	0	0
9050	Pstpip2	0	1	0	1	0	0	0	1	0	0	0	0	0	0	0	0	0	0	0	0	0	0	0	0	0	0	0	0	0
3574	Il7	0	1	0	1	0	0	0	1	0	0	0	0	0	0	0	0	0	0	0	1	0	0	0	0	0	0	0	0	0
54566	Epb41l4b	0	1	0	1	0	0	0	1	0	0	0	0	0	0	0	0	0	0	0	0	0	0	0	0	0	0	0	0	0
79819	Dnai4	0	1	0	1	0	0	0	1	0	0	0	0	0	0	0	0	0	0	0	0	0	0	0	0	0	0	0	0	0
2224	Fdps	0	0	1	1	0	0	1	0	0	0	0	0	0	0	0	0	0	1	0	0	0	0	0	0	0	1	0	0	0
10498	Carm1	0	1	0	1	0	0	0	1	0	0	0	0	0	0	1	0	0	1	0	0	0	0	0	0	0	1	0	0	0
25903	Olfml2b	0	1	0	1	0	0	0	1	0	0	0	0	0	0	0	0	0	0	0	0	0	0	0	0	0	0	0	0	0
29952	Dpp7	1	1	0	0	0	0	1	0	0	0	0	0	0	0	0	1	0	0	0	0	0	0	0	0	0	0	0	0	0
155066	Atp6v0e2	0	1	0	1	0	0	0	1	0	0	0	1	0	0	1	0	0	0	0	0	0	0	0	0	0	0	0	0	0
1573	Cyp2j6;Cyp2j9	0	1	0	1	0	0	0	1	0	0	0	0	0	0	0	0	0	1	0	0	0	0	0	0	0	0	0	0	0
4919	Ror1	0	1	0	1	0	0	0	1	0	0	0	0	0	0	0	0	0	0	0	0	0	0	0	0	0	0	0	0	0
3678	Itga5	0	1	0	1	0	0	0	1	1	0	1	0	0	1	0	0	0	0	1	0	0	1	0	0	0	0	0	0	0
4856	Ccn3	0	1	0	1	0	0	0	1	0	0	0	0	0	0	0	0	0	0	0	0	0	0	0	0	0	0	0	0	0
55967	Ndufa12	1	0	1	0	1	0	0	0	0	0	0	0	0	0	0	0	0	0	0	0	0	0	0	1	0	0	0	0	0
79691	Qtrt2	0	0	1	0	1	0	0	1	0	1	0	0	0	0	0	0	0	0	0	0	0	0	0	0	0	0	0	0	0
1510	Ctse	0	1	0	1	0	0	0	1	0	0	0	0	0	0	0	0	0	0	0	0	0	0	0	0	0	0	0	0	0
55117	Slc6a15	0	1	0	1	0	0	0	1	0	0	0	0	0	0	0	0	0	0	0	0	0	0	0	0	0	0	0	0	0
2651	Gcnt2	0	1	0	1	0	0	0	1	0	0	0	0	0	0	0	0	0	0	0	0	0	0	0	0	0	0	0	0	0
1509	Ctsd	1	0	1	0	1	0	0	0	1	0	0	0	0	0	0	1	0	0	0	0	0	0	0	0	0	0	0	0	0
55327	Lin7c	1	0	1	0	1	0	0	0	0	0	0	0	0	0	0	0	0	0	0	0	0	0	0	0	0	0	0	0	0
8542	Apol9a;Apol10b;Apol9b	0	1	0	1	0	1	0	0	0	0	0	0	0	0	0	0	0	0	0	0	1	0	1	0	1	0	0	0	0
3066	Hdac2	0	0	1	0	1	0	1	0	0	0	1	1	0	1	0	0	0	0	0	0	0	0	0	0	0	0	1	0	0
3601	Il15ra	0	1	0	1	0	0	0	1	0	0	0	0	0	0	0	0	0	0	0	1	0	0	0	0	0	0	0	0	0
84940	Coro6	0	0	0	1	0	1	0	1	0	0	0	0	0	0	0	0	0	0	0	0	0	0	0	0	0	0	0	0	0
81788	Nuak2	0	1	0	1	0	0	0	1	0	0	0	0	0	0	0	0	0	0	0	0	0	0	0	0	0	0	0	0	0
8795	Tnfrsf23;Tnfrsf10b	0	1	0	1	0	0	0	1	0	0	0	0	0	1	0	0	0	0	0	0	0	0	0	0	0	0	0	0	0
54972	Tmem132a	0	1	0	1	0	0	0	1	0	0	0	0	0	0	0	0	0	0	0	0	0	0	1	0	0	0	0	0	0
7584	Zfp105	0	1	0	1	0	0	0	1	0	0	0	0	0	0	0	0	0	0	0	0	0	0	0	0	0	0	0	0	0
83666	Parp9	0	1	0	1	0	0	0	1	0	0	0	0	0	0	0	0	0	0	0	0	0	0	0	0	0	0	0	0	0
2618	Gart	1	0	1	0	0	0	1	0	0	0	0	0	0	0	0	0	0	0	0	0	0	0	0	0	0	0	0	0	0
10123	Arl4c	0	1	0	1	0	0	0	1	0	0	0	0	0	0	0	0	0	0	0	0	0	0	0	0	0	0	0	0	0
286133	Scara5	0	1	0	1	0	0	0	1	0	0	0	0	0	0	0	0	0	0	0	0	1	0	0	0	1	0	0	0	0
3073	Hexa	1	0	1	0	0	0	1	0	0	0	0	0	0	0	0	0	1	1	0	0	0	0	0	0	0	0	0	0	0
6240	Rrm1	1	0	0	0	1	0	1	0	0	0	0	0	0	0	0	0	0	0	0	0	0	0	0	0	0	0	0	0	0
10827	Fam114a2	1	0	0	0	1	0	1	0	0	0	0	0	0	0	0	0	0	0	0	0	0	0	0	0	0	0	1	0	0
317	Apaf1	0	0	1	0	1	0	1	0	0	0	0	0	0	0	0	1	0	0	0	0	0	0	0	0	0	0	0	0	0
4925	Nucb2	1	1	0	1	0	0	0	0	0	0	0	0	0	0	0	0	0	0	0	0	0	0	0	0	0	0	0	0	0
2583	B4galnt1	0	1	0	1	0	0	0	1	0	0	0	0	0	0	0	0	0	1	0	0	0	0	0	0	0	0	0	0	0
9361	Lonp1	1	0	1	0	0	0	1	0	0	0	0	0	0	0	0	0	0	0	0	0	0	0	0	0	0	0	0	0	0
4162	Mcam	0	1	0	1	0	1	0	0	0	0	0	0	1	0	0	0	0	0	0	0	0	0	0	0	0	0	0	0	0
79633	Fat4	0	1	0	1	0	1	0	0	0	0	0	0	0	0	0	0	0	0	0	0	0	0	0	0	0	0	0	0	0
84894	Lingo1	0	1	0	1	0	0	0	1	0	0	0	0	0	0	0	0	0	0	0	0	0	0	0	0	0	0	0	0	0
25927	Cnrip1	0	1	0	1	0	0	0	1	0	0	0	0	0	0	0	0	0	0	0	0	0	0	0	0	0	0	0	0	0
85395	Fam207a	1	0	1	0	1	0	0	0	0	0	0	0	0	0	0	0	0	0	0	0	0	0	0	0	0	0	0	0	0
4037	Lrp3	0	1	0	0	0	1	0	1	0	0	0	0	0	0	0	0	0	0	0	0	0	0	0	0	0	0	0	0	0
130574	Lypd6	0	1	0	1	0	0	0	1	0	0	0	0	0	0	0	0	0	0	0	0	0	0	0	0	0	0	0	0	0
1466	Csrp2	0	1	1	0	0	0	0	1	0	0	0	0	0	0	0	0	0	0	0	0	0	0	0	0	0	0	0	0	0
2274	Fhl2	0	1	0	1	0	0	0	1	0	0	0	0	0	0	0	0	0	1	0	0	0	0	0	0	0	0	0	0	0
2331	Fmod	0	1	0	0	0	1	0	1	1	0	0	0	0	0	0	0	1	0	1	0	0	0	0	0	0	0	0	0	0
2152	F3	0	1	0	1	0	0	0	1	0	0	0	1	0	1	0	0	0	0	0	0	0	0	0	0	0	0	0	0	0
257194	Negr1	0	1	0	1	0	0	0	1	0	0	0	0	0	0	0	0	0	0	0	0	0	0	0	0	0	0	0	0	0
10491	Crtap	1	1	0	0	1	0	0	0	1	0	0	0	0	0	0	0	0	0	0	0	0	0	0	0	0	0	0	0	0
2745	Glrx	0	1	0	1	0	1	0	0	0	0	0	0	0	0	0	0	0	0	0	0	0	0	0	0	0	0	0	0	0
10061	Abcf2	1	0	1	0	0	0	1	0	0	0	0	0	0	0	0	0	0	0	0	0	0	0	0	0	0	0	0	0	0
9201	Dclk1	1	0	1	0	1	0	0	0	0	0	0	0	0	0	0	0	0	0	0	0	0	0	0	0	0	0	0	0	0
342184	Fmn1	0	1	0	1	0	1	0	0	0	0	0	0	0	0	0	0	0	0	0	0	0	0	0	0	0	0	0	0	0
79955	Pdzd7	0	1	0	1	0	0	0	1	0	0	0	0	0	0	0	0	0	0	0	0	0	0	0	0	0	0	0	0	0
54621	Vsig10	0	1	0	1	0	0	0	1	0	0	0	0	0	0	0	0	0	0	0	0	0	0	0	0	0	0	0	0	0
79009	Ddx50	1	0	1	0	0	0	1	0	0	0	0	0	0	0	0	0	0	0	0	0	0	0	0	0	0	0	0	0	0
1292	Col6a2	0	1	0	0	0	1	0	1	1	0	1	1	0	0	0	0	0	0	1	0	0	0	0	0	1	0	0	0	0
54328	Gpr173	0	1	0	1	0	0	0	1	0	0	0	0	0	0	0	0	0	0	0	0	0	0	0	0	0	0	0	0	0
23344	Esyt1	1	1	1	0	0	0	0	0	0	0	0	0	1	0	0	0	0	1	0	0	0	0	0	0	0	0	0	0	0
3750	Kcnd1	0	1	0	1	0	0	0	1	0	0	0	0	0	0	0	0	0	0	0	0	0	0	0	0	0	0	0	1	0
7264	Gfus	1	0	1	0	1	0	0	0	0	0	0	0	0	0	0	0	0	0	0	0	0	0	0	0	0	0	0	0	0
929	Cd14	0	1	0	1	0	0	0	1	0	0	0	0	0	0	0	1	0	0	0	0	0	0	0	0	0	0	0	0	0
586	Bcat1	1	0	1	0	0	0	1	0	0	1	0	0	0	0	0	0	0	0	0	0	0	0	0	0	0	0	0	0	0
2621	Gas6	0	1	0	1	0	0	0	1	0	0	0	0	0	1	0	0	0	0	0	0	0	0	1	0	0	0	0	0	0
79987	Svep1	0	1	0	0	0	1	0	1	0	0	0	0	0	0	0	0	0	0	0	0	0	0	0	0	0	0	0	0	0
285556	1110002E22Rik	0	1	0	1	0	0	0	1	0	0	0	0	0	0	0	0	0	0	0	0	0	0	0	0	0	0	0	0	0
10308	Zfp941	0	1	0	1	0	0	0	1	0	0	0	0	0	0	0	0	0	0	0	0	0	0	0	0	0	0	0	0	0
115330	Gpr146	0	1	0	1	0	0	0	1	0	0	0	0	0	0	0	0	0	0	0	0	0	0	0	0	0	0	0	0	0
8045	Rassf7	0	1	0	1	0	0	0	1	0	0	0	0	0	0	0	0	0	0	0	0	0	0	0	0	0	0	0	0	0
4330	Mn1	0	1	0	1	0	0	0	1	0	0	0	0	0	0	0	0	0	0	0	0	0	0	0	0	0	0	0	0	0
55776	Saysd1	0	1	0	1	0	0	0	1	0	0	0	0	0	0	0	0	0	0	0	0	0	0	0	0	0	0	0	0	0
2944	Gstm2	0	1	1	0	0	0	0	1	0	0	0	0	0	0	0	0	0	0	0	0	0	0	0	0	0	0	0	0	0
9886	Rhobtb1	0	1	0	1	0	0	0	1	0	0	0	0	1	0	0	0	0	0	0	0	0	0	0	0	0	0	0	0	0
338	Apob	0	1	0	1	0	0	0	1	0	0	0	0	0	1	1	0	0	0	0	0	1	0	1	0	1	0	0	0	0
147372	Ccbe1	0	1	0	1	0	0	0	1	0	0	0	0	0	0	0	0	0	0	0	0	0	0	0	0	0	0	0	0	0
79954	Nol10	1	0	1	0	0	0	1	0	0	0	0	0	0	0	0	0	0	0	0	0	0	0	0	0	0	0	0	0	0
5476	Ctsa	1	0	1	0	0	0	1	0	0	0	0	0	0	0	0	1	0	1	0	0	0	0	0	0	0	0	0	0	0
6850	Syk	0	0	0	1	0	1	0	1	0	0	0	0	0	1	0	0	0	0	0	1	0	0	0	0	0	0	0	0	0
5580	Prkcd	0	1	0	1	0	0	0	1	0	0	0	1	1	1	1	1	0	0	0	1	0	0	0	0	0	0	1	0	0
9581	Prepl	0	1	0	1	0	0	0	1	0	0	0	0	0	0	0	0	0	0	0	0	0	0	0	0	0	0	0	0	0
79188	Tmem43	1	0	1	0	0	0	1	0	0	0	0	0	0	0	0	0	0	0	0	0	0	0	0	0	0	0	0	0	0
125058	Tbc1d16	0	1	0	1	0	0	0	1	0	0	0	0	0	0	0	0	0	0	0	0	1	0	0	0	0	0	0	0	0
100287362	Prss46	0	1	0	1	0	0	0	1	0	0	0	0	0	0	0	0	0	0	0	0	0	0	0	0	0	0	0	0	0
127428	Tceanc2	0	1	0	1	0	0	0	1	0	0	0	0	0	0	0	0	0	0	0	0	0	0	0	0	0	0	0	0	0
5034	P4hb	1	0	1	0	1	0	0	0	1	0	0	0	0	0	1	0	0	0	0	1	0	0	1	0	0	0	0	0	0
5573	Prkar1a	1	0	1	0	1	0	0	0	0	0	0	0	0	1	0	0	0	0	0	0	0	0	0	0	0	0	1	0	0
4217	Map3k5	0	1	0	1	0	0	0	1	0	0	0	0	0	0	1	0	0	0	0	0	0	0	0	0	0	0	0	0	0
80774	Limd2	0	1	0	1	0	0	0	1	0	0	0	0	0	0	0	0	0	0	0	0	0	0	0	0	0	0	0	0	0
10389	Scml2	0	1	0	1	0	0	0	1	0	0	0	0	0	0	0	0	0	0	0	0	0	0	0	0	0	0	0	0	0
3655	Itga6	0	1	0	1	0	0	0	1	1	0	0	0	0	1	0	0	0	0	1	0	0	0	0	0	0	0	0	0	0
5101	Pcdh9	0	1	0	1	0	0	0	1	0	0	0	0	0	0	0	0	0	0	0	0	0	0	0	0	0	0	0	0	0
57575	Pcdh10	0	1	0	1	0	0	0	1	0	0	0	0	0	0	0	0	0	0	0	0	0	0	0	0	0	0	0	0	0
375759	1700001O22Rik	0	1	0	1	0	0	0	1	0	0	0	0	0	0	0	0	0	0	0	0	0	0	0	0	0	0	0	0	0
9208	Lrrfip1	1	0	0	0	1	0	1	0	0	0	0	0	0	0	0	0	0	0	0	0	0	0	0	0	0	0	1	0	0
5137	Pde1c	0	1	0	1	0	0	0	1	0	0	0	0	0	0	0	0	0	0	0	0	0	0	0	0	0	0	1	0	0
97	Acyp1	1	0	0	1	1	0	0	0	0	0	0	0	0	0	0	0	0	0	0	0	0	0	0	0	0	0	0	0	0
168002	Dact2	0	1	0	1	0	1	0	0	0	0	0	0	0	0	0	0	0	0	0	0	0	0	0	0	0	0	0	0	0
5007	Osbp	1	0	1	0	0	0	1	0	0	0	0	0	0	0	0	0	0	1	0	0	0	0	0	0	0	0	0	0	0
6904	Tbcd	1	0	1	0	1	0	0	0	0	0	0	0	0	0	0	0	0	0	0	0	0	0	0	0	0	0	0	0	0
5831	Pycr1	0	0	0	1	1	0	1	0	0	0	0	0	0	0	0	0	0	0	0	0	0	0	0	0	0	0	0	0	0
84466	Megf10	0	0	0	1	0	1	0	1	0	0	0	0	0	0	0	0	0	0	0	0	0	0	0	0	0	0	0	0	0
22984	Pdcd11	1	0	1	0	0	0	1	0	0	1	0	0	0	0	0	0	0	0	0	0	0	0	0	0	0	0	0	0	0
1294	Col7a1	0	1	0	1	0	0	0	1	1	0	0	0	0	0	0	0	0	0	1	0	1	0	0	0	0	0	0	0	0
8644	Akr1c14	1	0	1	0	0	0	1	0	0	0	0	0	0	0	0	0	0	1	0	0	0	0	0	0	0	0	0	0	0
5050	Pafah1b3	0	1	0	1	0	0	0	1	0	0	0	0	0	0	0	0	0	0	0	0	1	0	0	0	0	0	0	0	0
4118	Mal	0	1	0	1	0	1	0	0	0	0	0	0	0	0	0	0	0	0	0	0	0	0	0	0	0	0	0	0	0
10439	Olfm1	0	1	0	0	0	1	0	1	0	0	0	0	0	0	0	0	0	0	0	0	0	0	0	0	0	0	0	0	0
113026	Plcd3	0	1	0	1	0	0	0	1	0	0	0	0	0	0	0	0	0	0	0	0	0	0	0	0	0	0	0	0	0
10458	Baiap2	1	0	1	0	1	0	0	0	0	0	0	1	1	0	0	0	0	0	0	0	0	0	0	0	0	0	0	0	0
3487	Igfbp4	0	1	0	1	0	1	0	0	0	0	0	0	0	0	0	0	0	0	0	0	0	0	1	0	0	0	0	0	0
340419	Rspo2	0	1	0	1	0	1	0	0	0	0	0	0	0	0	0	0	0	0	0	0	0	0	0	0	0	0	0	0	0
5336	Plcg2	0	1	0	0	0	1	0	1	0	0	0	0	0	1	0	0	0	0	0	0	0	0	0	0	0	0	0	0	0
9114	Atp6v0d1	1	0	1	0	0	0	1	0	0	1	0	1	0	0	1	0	0	0	0	0	0	0	0	0	0	0	0	0	0
4998	Orc1	0	1	0	1	0	0	0	1	0	0	0	0	0	0	0	0	0	0	0	0	0	0	0	0	0	0	0	0	0
5238	Pgm3	1	1	1	0	0	0	0	0	0	0	0	0	0	0	0	0	0	0	0	0	0	0	0	0	0	0	0	0	0
5787	Ptprb	0	1	0	1	0	0	0	1	0	0	0	0	0	0	0	1	0	0	0	0	0	0	0	0	0	0	0	0	0
7037	Tfrc	1	0	1	0	1	0	0	0	0	0	0	0	1	0	0	0	0	0	0	0	1	0	0	0	0	0	0	0	0
90161	Hs6st2	0	1	0	1	0	0	0	1	0	0	0	0	0	0	0	0	1	0	0	0	0	0	0	0	0	0	0	0	0
57505	Aars2	1	0	1	0	1	0	0	0	0	1	0	0	0	0	0	0	0	0	0	0	0	0	0	0	0	0	0	0	0
64787	Eps8l2	0	1	0	1	0	0	0	1	0	0	0	0	0	0	0	0	0	0	0	0	0	0	0	0	0	0	0	0	0
5270	Serpine2	0	1	0	1	0	0	0	1	0	0	0	0	0	1	0	0	0	0	0	0	0	0	0	0	0	0	0	0	0
56853	Celf4	0	1	0	1	0	0	0	1	0	0	0	0	0	0	0	0	0	0	0	0	0	0	0	0	0	0	0	0	0
5306	Pitpna	0	0	1	0	1	0	1	0	0	0	1	0	0	0	0	0	0	0	0	1	0	0	0	0	0	0	0	0	0
9435	Chst2	0	1	0	1	0	0	0	1	0	0	0	0	0	0	0	0	1	0	0	0	0	0	0	0	0	0	0	0	0
28951	Trib2	0	1	0	1	0	1	0	0	0	0	0	0	0	0	0	0	0	0	0	0	0	0	0	0	0	0	0	0	0
6696	Spp1	0	1	0	1	0	0	0	1	1	0	0	1	0	0	0	0	0	0	1	0	0	0	1	0	0	0	0	0	0
57514	Arhgap31	0	1	0	1	0	0	0	1	0	0	0	0	1	0	0	0	0	0	0	0	0	0	0	0	0	0	0	0	0
6861	Syt5	0	1	0	1	0	0	0	1	0	0	0	0	0	0	0	0	0	0	0	0	0	0	0	0	0	0	0	0	0
113	Adcy7	0	1	0	1	0	0	0	1	0	0	0	0	0	0	0	0	0	0	0	0	0	0	0	0	0	0	1	0	0
160335	Tmtc2	0	1	0	1	0	0	0	1	0	0	0	0	0	0	0	0	0	0	0	0	0	0	0	0	0	0	0	0	0
274	Bin1	0	0	1	1	1	0	0	0	0	0	0	0	0	0	0	0	0	0	0	0	1	0	0	0	0	0	0	0	0
375035	Sft2d2	0	1	0	1	0	0	0	1	0	0	0	0	0	0	0	0	0	0	0	0	0	0	0	0	0	0	0	0	0
1892	Echs1	1	0	1	0	0	0	1	0	0	1	0	0	0	0	0	0	0	1	0	0	0	0	0	0	0	0	0	0	0
4671	Naip2	0	1	0	1	0	0	0	1	0	0	0	0	0	0	0	0	0	0	0	0	0	0	0	0	0	0	0	0	0
8000	Psca	0	1	0	1	0	0	0	1	0	0	0	0	0	0	0	0	0	0	0	0	0	0	0	0	0	0	0	0	0
55670	Pex26	0	1	0	1	0	0	0	1	0	0	0	0	0	0	0	0	0	0	0	0	0	0	0	0	0	0	0	0	0
1382	Crabp2	0	1	0	1	0	0	0	1	0	0	0	0	0	0	0	0	0	0	0	0	0	0	0	0	0	0	0	0	0
9358	Itgbl1	0	1	0	1	0	0	0	1	0	0	0	0	0	0	0	0	0	0	0	0	0	0	0	0	0	0	0	0	0
9136	Rrp9	1	0	1	1	0	0	0	0	0	1	0	0	0	0	0	0	0	0	0	0	0	0	0	0	0	0	0	0	0
10810	Wasf3	0	1	0	1	0	0	0	1	0	0	0	1	1	0	0	0	0	0	0	0	0	0	0	0	0	0	0	0	0
3949	Ldlr	1	1	0	1	0	0	0	0	0	0	0	0	0	0	0	0	0	0	0	0	1	0	0	0	0	0	0	0	0
8609	Klf7	0	1	0	1	0	0	0	1	0	0	0	0	0	0	0	0	0	0	0	0	0	0	0	0	0	0	0	0	0
3486	Igfbp3	0	1	0	1	0	0	0	1	0	0	0	0	0	0	0	0	0	0	0	0	0	0	1	0	0	0	0	0	0
11262	Sp140	0	1	0	1	0	1	0	0	0	0	0	0	0	0	0	0	0	0	0	0	0	0	0	0	0	0	0	0	0
84951	Tns4	0	1	0	1	0	1	0	0	0	0	0	1	0	0	0	0	0	0	1	0	0	0	0	0	0	0	0	0	0
8291	Dysf	0	1	0	1	0	1	0	0	0	0	0	0	0	0	0	0	0	0	0	0	0	0	0	0	0	0	0	1	0
2138	Eya1	0	1	0	1	0	1	0	0	0	0	0	0	0	0	0	0	0	0	0	0	0	0	0	0	0	0	0	0	0
9378	Nrxn1	0	1	0	1	0	0	0	1	1	0	0	0	0	0	0	0	0	0	1	0	0	0	0	0	0	0	0	0	0
8533	Cops3	1	0	1	0	1	0	0	0	0	0	0	0	0	0	0	0	0	0	0	0	1	0	0	0	0	0	0	0	0
6921	Eloc	0	1	0	1	0	0	0	1	0	0	1	0	0	0	1	0	0	0	0	1	0	0	0	0	0	0	0	0	0
11245	Gpr176	0	1	0	1	0	1	0	0	0	0	0	0	0	0	0	0	0	0	0	0	0	0	0	0	0	0	0	0	0
30	Acaa1a	1	0	1	0	1	0	0	0	0	0	0	0	0	0	0	1	0	1	0	0	0	0	0	0	0	0	0	0	0
800	Cald1	0	0	1	0	1	0	1	0	0	0	0	0	0	0	0	0	0	0	0	0	0	0	0	0	0	0	0	1	0
79805	Vash2	0	1	0	1	0	0	0	1	0	0	0	0	0	0	0	0	0	0	0	0	0	0	0	0	0	0	0	0	0
24139	Eml2	0	1	0	1	0	0	0	1	0	0	0	0	0	0	0	0	0	0	0	0	0	0	0	0	0	0	0	0	0
7941	Pla2g7	0	1	0	1	0	0	0	1	0	0	0	0	0	0	0	0	0	0	0	0	0	0	0	0	0	0	0	0	0
200844	Cfap20dc	0	1	0	1	0	0	0	1	0	0	0	0	0	0	0	0	0	0	0	0	0	0	0	0	0	0	0	0	0
114880	Osbpl6	0	1	0	1	0	0	0	1	0	0	0	0	0	0	0	0	0	1	0	0	0	0	0	0	0	1	0	0	0
1032	Cdkn2d	0	1	0	1	0	0	0	1	0	0	0	0	0	0	1	0	0	0	0	0	0	0	0	0	0	0	0	0	0
6821	Suox	0	1	0	1	0	0	0	1	0	0	0	0	0	0	0	0	0	0	0	0	0	0	0	0	0	0	0	0	0
2615	Lrrc32	0	1	0	1	0	0	0	1	0	0	0	0	0	0	0	0	0	0	0	0	0	0	0	0	0	0	0	0	0
1819	Drg2	1	0	1	0	0	0	1	0	0	0	0	0	0	0	0	0	0	0	0	0	0	0	0	0	0	0	0	0	0
8767	Ripk2	0	1	0	1	0	1	0	0	0	0	0	0	0	0	0	0	0	0	0	1	0	0	0	0	0	0	0	0	0
10395	Dlc1	0	1	0	0	0	1	0	1	0	0	0	0	1	0	0	0	0	0	0	0	0	0	0	0	0	0	0	0	0
3688	Itgb1	1	1	0	1	0	0	0	0	1	0	1	1	1	1	0	0	0	0	1	1	0	1	0	0	0	0	0	0	0
5627	Pros1	0	1	0	1	0	0	0	1	0	0	0	0	0	1	0	0	0	0	0	0	0	0	0	0	0	0	0	0	0
3625	Inhbb	0	1	0	1	0	0	0	1	0	0	0	0	0	0	0	0	0	0	0	0	0	0	0	0	0	0	0	0	0
150223	Ydjc	0	1	0	1	0	0	0	1	0	0	0	0	0	0	0	0	0	0	0	0	0	0	0	0	0	0	0	0	0
2791	Gng11	0	1	0	1	0	0	0	1	0	0	0	0	0	1	0	0	0	0	0	0	0	0	0	0	0	0	0	0	0
10632	Atp5mg	1	0	1	0	1	0	0	0	0	0	0	0	0	0	0	0	0	0	0	0	0	0	0	1	0	0	0	0	0
8646	Chrd	0	1	0	1	0	0	0	1	0	0	0	0	0	0	0	0	0	0	0	0	0	0	0	0	0	0	0	0	0
64129	Tinagl1	0	1	0	1	0	0	0	1	0	0	0	0	0	0	0	0	0	0	0	0	0	0	0	0	0	0	0	0	0
4705	Ndufa10	1	0	1	0	1	0	0	0	0	0	0	0	0	0	0	0	0	0	0	0	0	0	0	1	0	0	0	0	0
84898	Plxdc2	0	1	0	1	0	0	0	1	0	0	0	0	0	0	0	0	0	0	0	0	0	0	0	0	0	0	0	0	0
375298	Cerkl	0	1	0	1	0	1	0	0	0	0	0	0	0	0	0	0	0	0	0	0	0	0	0	0	0	0	0	0	0
84171	Loxl4	0	1	0	1	0	0	0	1	1	0	0	0	0	0	0	0	0	0	0	0	0	1	0	0	1	0	0	0	0
7268	Ttc4	0	1	0	1	0	0	0	1	0	0	0	0	0	0	0	0	0	0	0	0	0	0	0	0	0	0	0	0	0
4642	Myo1d	0	1	1	0	0	0	1	0	0	0	0	0	0	0	0	0	0	0	0	0	0	0	0	0	0	0	0	0	0
63895	Piezo2	0	1	0	0	0	1	0	1	0	0	0	0	0	0	0	0	0	0	0	0	0	0	0	0	0	0	0	0	0
8574	Akr7a2	1	0	1	0	1	0	0	0	0	0	0	0	0	0	0	0	0	0	0	0	0	0	0	0	0	0	0	0	0
5563	Prkaa2	0	1	0	1	0	0	0	1	0	0	0	0	0	0	0	0	0	1	0	0	1	0	0	0	0	0	0	0	0
3909	Lama3	0	0	0	1	0	1	0	1	1	0	0	1	0	0	0	0	0	0	1	0	0	0	0	0	1	0	0	0	0
6376	Cx3cl1	0	1	0	1	0	0	0	1	0	0	0	0	0	0	0	0	0	0	0	0	0	0	0	0	0	0	0	0	0
64283	Arhgef28	0	1	0	1	0	0	0	1	0	0	1	0	1	0	0	0	0	0	0	0	0	0	0	0	0	0	0	0	0
10577	Npc2	1	0	1	0	0	0	1	0	0	0	0	0	0	0	0	1	0	0	0	0	0	0	0	0	0	0	0	0	0
60312	Afap1	0	1	0	1	0	0	0	1	0	0	0	0	0	0	0	0	0	0	0	0	0	0	0	0	0	0	0	0	0
23657	Slc7a11	0	1	0	1	0	1	0	0	0	0	0	0	0	1	0	0	0	0	0	0	0	0	0	0	0	0	0	0	0
10857	Pgrmc1	1	0	1	0	1	0	0	0	0	0	0	0	0	0	0	1	0	0	0	0	0	0	0	0	0	0	0	0	0
1879	Ebf1	0	1	0	1	0	0	0	1	0	0	0	0	0	0	0	0	0	0	0	0	0	0	0	0	0	0	0	0	0
1758	Dmp1	0	1	0	1	0	0	0	1	1	0	0	0	0	0	0	0	0	0	1	0	0	0	1	0	0	0	0	0	0
51176	Lef1	0	1	0	1	0	0	0	1	0	0	0	0	0	0	0	0	0	0	0	0	0	0	0	0	0	0	0	0	0
25824	Prdx5	1	0	1	0	1	0	0	0	0	0	0	0	0	0	1	0	0	0	0	0	0	0	0	0	0	0	0	0	0
2252	Fgf7	0	1	0	1	0	1	0	0	0	0	0	1	0	0	0	0	0	0	0	0	0	0	0	0	0	0	1	0	0
2042	Epha3	0	0	0	1	0	1	0	1	0	0	1	0	0	0	0	0	0	0	0	0	0	0	0	0	0	0	0	0	0
22881	Ankrd6	0	1	0	1	0	0	0	1	0	0	0	0	0	0	0	0	0	0	0	0	0	0	0	0	0	0	0	0	0
10591	Dnph1	1	0	0	0	1	0	1	0	0	0	0	0	0	0	0	0	0	0	0	0	0	0	0	0	0	0	0	0	0
11141	Il1rapl1	0	1	0	1	0	0	0	1	0	0	0	0	0	0	0	0	0	0	0	1	0	0	0	0	0	0	0	0	0
223075	Itprid1	0	1	0	1	0	0	0	1	0	0	0	0	0	0	0	0	0	0	0	0	0	0	0	0	0	0	0	0	0
343450	Kcnt2	0	1	0	1	0	0	0	1	0	0	0	0	0	0	0	0	0	0	0	0	0	0	0	0	0	0	0	0	0
253738	Ebf3	0	1	0	1	0	0	0	1	0	0	0	0	0	0	0	0	0	0	0	0	0	0	0	0	0	0	0	0	0
26064	Rai14	0	1	1	1	0	0	0	0	0	0	0	0	0	0	0	0	0	0	0	0	0	0	0	0	0	0	0	0	0
1124	Chn2	0	1	0	1	0	0	0	1	0	0	0	0	1	0	0	0	0	0	0	0	0	0	0	0	0	0	0	0	0
100628315	Dnm3os	0	1	0	1	0	0	0	1	0	0	0	0	0	0	0	0	0	0	0	0	0	0	0	0	0	0	0	0	0
54765	Trim44	0	1	0	1	0	1	0	0	0	0	0	0	0	0	0	0	0	0	0	0	0	0	0	0	0	0	0	0	0
642658	Scx	0	1	0	1	0	0	0	1	0	0	0	0	0	0	0	0	0	0	0	0	0	0	0	0	0	0	0	0	0
5074	Pawr	1	0	1	1	0	0	0	0	0	0	0	0	0	0	0	0	0	0	0	0	0	0	0	0	0	0	0	0	0
2920	Cxcl1	0	1	0	1	0	0	0	1	0	0	0	0	0	0	0	0	0	0	0	1	0	0	0	0	0	0	0	0	0
117283	Ip6k3	0	1	0	1	0	1	0	0	0	0	0	0	0	0	0	0	0	0	0	0	0	0	0	0	0	0	0	0	0
6583	Slc22a4	0	1	0	1	0	1	0	0	0	0	0	0	0	0	0	0	0	0	0	0	0	0	0	0	0	0	0	0	0
1562	Cyp2c55	0	1	0	1	0	0	0	1	0	0	0	0	0	0	0	0	0	0	0	0	0	0	0	0	0	0	0	0	0
51202	Ddx47	0	0	1	0	1	0	1	0	0	1	0	0	0	0	0	0	0	0	0	0	0	0	0	0	0	0	0	0	0
59341	Trpv4	0	1	0	1	0	0	0	1	0	0	0	0	0	0	0	0	0	0	0	0	0	0	0	0	0	0	0	0	0
1993	Elavl2	0	1	0	1	0	0	0	1	0	0	0	0	0	0	0	0	0	0	0	0	0	0	0	0	0	0	0	0	0
58533	Snx6	0	0	1	0	1	0	1	0	0	0	0	0	0	0	0	0	0	0	0	0	0	0	0	0	0	0	0	0	0
64151	Ncapg	1	0	1	0	0	0	1	0	0	0	0	0	0	0	0	0	0	0	0	0	0	0	0	0	0	0	0	0	0
8728	Adam19	0	1	0	1	0	0	0	1	1	0	0	0	0	0	0	0	0	0	0	0	0	0	0	0	0	0	0	0	0
51181	Cbr2;Dcxr	1	0	1	1	0	0	0	0	0	0	0	0	0	0	0	0	1	0	0	0	0	0	0	0	0	0	0	0	0
1608	Dgkg	0	1	0	1	0	1	0	0	0	0	0	0	0	1	0	0	0	0	0	0	0	0	0	0	0	0	0	0	0
4153	Klra17;Klra6	0	1	0	1	0	0	0	1	0	0	0	0	0	0	0	0	0	0	0	0	0	0	0	0	0	0	0	0	0
4641	Myo1c	1	0	1	0	0	0	1	0	0	0	0	0	0	0	0	0	0	0	0	0	1	0	0	0	0	0	0	0	0
11100	Hnrnpul1	1	0	1	0	1	0	0	0	0	1	0	0	0	0	0	0	0	0	0	0	0	0	0	0	0	0	0	0	0
58191	Cxcl16	0	1	0	1	0	0	0	1	0	0	0	0	0	0	0	0	0	0	0	0	0	0	0	0	0	0	0	0	0
9321	Trip11	1	0	1	0	1	0	0	0	0	0	0	0	0	0	0	0	0	0	0	0	1	0	0	0	0	0	1	0	0
7297	Tyk2	0	1	0	1	0	0	0	1	0	0	0	0	0	0	0	0	0	0	0	1	0	0	0	0	0	0	1	0	0
10411	Rapgef3	0	1	0	1	0	0	0	1	0	0	0	0	0	1	0	0	0	0	0	0	0	0	0	0	0	0	0	0	0
90019	Syt8	0	1	0	1	0	0	0	1	0	0	0	0	0	0	0	0	0	0	0	0	1	0	0	0	0	0	0	0	0
7083	Tk1	0	0	1	0	1	0	1	0	0	0	0	0	0	0	0	0	0	0	0	0	0	0	0	0	0	0	0	0	0
5806	Ptx3	0	1	0	1	0	1	0	0	0	0	0	0	0	0	0	1	0	0	0	0	0	0	0	0	0	0	0	0	0
1747	Dlx3	0	1	0	1	0	0	0	1	0	0	0	0	0	0	0	0	0	0	0	0	0	0	0	0	0	0	0	0	0
25925	Zfp521	0	1	0	1	0	1	0	0	0	0	0	0	0	0	0	0	0	0	0	0	0	0	0	0	0	0	0	0	0
90580	Timm29	0	1	0	1	0	0	0	1	0	0	0	0	0	0	0	0	0	0	0	0	0	0	0	0	0	0	0	0	0
729920	Crppa	0	1	0	1	0	0	0	1	0	0	0	0	0	0	0	0	0	0	0	0	0	0	0	0	0	0	0	0	0
291	Slc25a4	1	0	1	0	1	0	0	0	0	0	0	0	0	0	0	0	0	0	0	0	0	0	0	0	0	0	0	0	0
50515	Chst11	0	1	0	0	0	1	0	1	0	0	0	0	0	0	0	0	1	0	0	0	0	0	0	0	0	0	0	0	0
84435	Adgra1	0	1	0	0	0	1	0	1	0	0	0	0	0	0	0	0	0	0	0	0	0	0	0	0	0	0	0	0	0
134430	Wdr36	0	0	1	0	1	0	1	0	0	1	0	0	0	0	0	0	0	0	0	0	0	0	0	0	0	0	0	0	0
3614	Impdh1	0	0	0	0	1	0	1	1	0	0	0	0	0	0	0	1	0	0	0	0	0	0	0	0	0	0	0	0	0
9380	Grhpr	1	0	1	0	0	0	1	0	0	1	0	0	0	0	0	0	0	0	0	0	0	0	0	0	0	0	0	0	0
11174	Adamts6	0	1	0	1	0	0	0	1	0	0	0	0	0	0	0	0	0	0	0	0	0	0	0	0	0	0	0	0	0
9542	Nrg2	0	1	0	1	0	0	0	1	0	0	0	1	0	0	0	0	0	0	0	0	0	0	0	0	0	0	1	0	0
10046	Mamld1	0	1	0	1	0	0	0	1	0	0	0	0	0	0	0	0	0	0	0	0	0	0	0	0	0	0	1	0	0
553115	Pef1	1	0	1	0	0	0	1	0	0	0	0	0	0	0	0	0	0	0	0	0	0	0	0	0	0	0	0	0	0
84938	Atg4c	0	1	0	1	0	0	0	1	0	0	0	0	0	0	0	0	0	0	0	0	0	0	0	0	0	0	0	0	0
5329	Plaur	0	1	0	1	0	1	0	0	0	0	0	0	0	1	0	1	0	0	0	0	0	0	0	0	0	0	0	0	0
3489	Igfbp6	0	1	0	1	0	1	0	0	0	0	0	0	0	0	0	0	0	0	0	0	0	0	1	0	0	0	0	0	0
2941	Gsta4	0	0	1	0	0	1	1	0	0	0	0	0	0	0	0	0	0	0	0	0	0	0	0	0	0	0	0	0	0
65083	Nol6	0	0	1	0	1	0	1	0	0	1	0	0	0	0	0	0	0	0	0	0	0	0	0	0	0	0	0	0	0
80758	Prr7	0	1	0	0	0	1	0	1	0	0	0	0	0	0	0	0	0	0	0	0	0	0	0	0	0	0	0	0	0
114803	Mysm1	0	1	0	1	0	0	0	1	0	0	0	0	0	0	0	0	0	0	0	0	0	0	0	0	0	0	0	0	0
8840	Ccn4	0	1	0	1	0	0	0	1	0	0	0	0	0	0	0	0	0	0	0	0	0	0	0	0	0	0	0	0	0
10290	Speg	0	1	0	1	0	0	0	1	0	0	0	0	0	0	0	0	0	0	0	0	0	0	0	0	0	0	0	0	0
489	Atp2a3	0	1	0	1	0	0	0	1	0	0	0	0	0	1	0	0	0	0	0	0	0	0	0	0	0	0	0	1	0
5538	Ppt1	1	0	1	0	1	0	0	0	0	0	0	0	0	0	0	0	0	1	0	0	0	0	0	0	0	0	0	0	0
23358	Usp24	0	1	0	1	0	0	0	1	0	0	0	0	0	0	0	0	0	0	0	0	0	0	0	0	0	0	0	0	0
59345	Gnb4	0	1	0	1	0	0	0	1	0	0	0	0	0	1	0	0	0	0	0	0	0	0	0	0	0	0	0	0	0
8482	Sema7a	0	1	0	1	0	0	0	1	0	0	1	0	0	0	0	0	0	0	0	0	0	0	0	0	0	0	0	0	0
164592	Ccdc116	0	1	0	1	0	0	0	1	0	0	0	0	0	0	0	0	0	0	0	0	0	0	0	0	0	0	0	0	0
51560	Rab6b	0	1	0	1	0	0	0	1	0	0	0	0	0	0	0	0	0	0	0	0	1	0	0	0	0	0	0	0	0
5328	Plau	0	1	0	1	0	0	0	1	0	0	0	0	0	1	0	1	0	0	0	0	0	0	0	0	0	0	0	0	0
54936	Adprs	1	0	1	0	1	0	0	0	0	0	0	0	0	0	0	0	0	0	0	0	0	0	0	0	0	0	0	0	0
2923	Pdia3	0	1	0	0	1	0	1	0	0	0	0	0	0	0	0	0	0	0	0	0	0	0	0	0	0	0	0	0	0
1008	Cdh10	0	1	0	1	0	1	0	0	0	0	0	0	0	0	0	0	0	0	0	0	0	0	0	0	0	0	0	0	0
3929	Lbp	0	1	0	1	0	0	0	1	0	0	0	0	0	0	0	0	0	0	0	1	0	0	0	0	0	0	0	0	0
2250	Fgf5	0	1	0	1	0	0	0	1	0	0	0	1	0	0	0	0	0	0	0	0	0	0	0	0	0	0	1	0	0
51378	Angpt4	0	1	0	1	0	0	0	1	0	0	0	0	0	1	0	0	0	0	0	0	0	0	0	0	0	0	0	0	0
121512	Fgd4	0	1	0	1	0	0	0	1	0	0	0	0	1	0	0	0	0	0	0	0	0	0	0	0	0	0	0	0	0
59	Acta2	0	1	0	1	0	1	0	0	0	0	0	0	0	0	0	0	0	0	0	0	0	0	0	0	0	0	0	1	0
5339	Plec	1	0	1	0	1	0	0	0	1	0	0	0	0	0	0	0	0	0	0	0	0	0	0	0	0	0	0	0	0
26136	Tes	1	0	1	0	0	0	1	0	0	0	0	0	0	0	0	0	0	0	0	0	0	0	0	0	0	0	0	0	0
64780	Mical1	0	1	0	1	0	0	0	1	0	0	0	0	0	1	0	0	0	0	0	0	0	0	0	0	0	0	0	0	0
83856	Fsd1l	0	1	0	1	0	0	0	1	0	0	0	0	0	0	0	0	0	0	0	0	0	0	0	0	0	0	0	0	0
6711	Sptbn1	1	0	1	0	1	0	0	0	0	0	1	0	1	0	0	0	0	0	0	0	1	0	0	0	0	0	1	0	0
5396	Prrx1	0	1	0	1	0	0	0	1	0	0	0	0	0	0	0	0	0	0	0	0	0	0	0	0	0	0	0	0	0
57664	Plekha4	0	1	0	1	0	0	0	1	0	0	0	0	0	0	0	0	0	1	0	0	0	0	0	0	0	0	0	0	0
117248	Galnt15	0	1	0	1	0	1	0	0	0	0	0	0	0	0	0	0	0	0	0	0	0	0	0	0	0	0	0	0	0
83394	Pitpnm3	0	1	0	1	0	0	0	1	0	0	0	0	0	0	0	0	0	1	0	0	0	0	0	0	0	0	0	0	0
6678	Sparc	1	1	0	0	1	0	0	0	1	0	0	1	0	1	0	0	0	0	1	0	1	0	0	0	1	0	0	0	0
1465	Csrp1	0	1	0	1	0	0	1	0	0	0	0	0	0	0	1	0	0	0	0	0	0	0	0	0	0	0	0	0	0
54842	Mfsd6	0	1	0	1	0	0	0	1	0	0	0	0	0	0	0	0	0	0	0	0	0	0	0	0	0	0	0	0	0
4710	Ndufb4	0	0	1	0	1	0	1	0	0	0	0	0	0	0	0	0	0	0	0	0	0	0	0	1	0	0	0	0	0
57659	Zbtb4	0	1	0	1	0	0	0	1	0	0	0	0	0	0	0	0	0	0	0	0	0	0	0	0	0	0	0	0	0
3597	Il13ra1	0	0	0	1	0	1	0	1	0	0	0	0	0	0	0	0	0	0	0	1	0	0	0	0	0	0	0	0	0
112817	Hoga1	0	1	0	1	0	0	0	1	0	0	0	0	0	0	0	0	0	0	0	0	0	0	0	0	0	0	0	0	0
338707	B4galnt4	0	1	0	0	0	1	0	1	0	0	0	0	0	0	0	0	0	0	0	0	0	0	0	0	0	0	0	0	0
9507	Adamts4	0	1	0	1	0	0	0	1	1	0	0	0	0	0	0	0	0	0	0	0	0	0	0	0	0	0	0	0	0
898	Ccne1	0	0	0	1	0	1	0	1	0	0	0	0	1	0	1	0	0	0	0	0	0	0	0	0	0	0	0	0	0
4130	Map1a	0	1	0	1	0	0	0	1	0	0	0	0	0	0	0	0	0	0	0	0	0	0	0	0	0	0	0	0	0
284106	Cisd3	0	1	0	1	0	1	0	0	0	0	0	0	0	0	0	0	0	0	0	0	0	0	0	0	0	0	0	0	0
346171	Zfp57	0	1	0	1	0	0	0	1	0	0	0	0	0	0	0	0	0	0	0	0	0	0	0	0	0	0	0	0	0
89866	Sec16b	0	1	0	0	0	1	0	1	0	0	0	0	0	0	0	0	0	0	0	0	1	0	0	0	0	0	0	0	0
4723	Ndufv1	1	0	1	0	1	0	0	0	0	0	0	0	0	0	0	0	0	0	0	0	0	0	0	1	0	0	0	0	0
6745	Ssr1	1	0	1	0	1	0	0	0	0	1	0	0	0	0	1	0	0	0	0	0	0	0	0	0	0	0	0	0	0
65260	Coa7	0	1	0	1	0	0	0	1	0	0	0	0	0	0	0	0	0	0	0	0	0	0	0	0	0	0	0	0	0
4839	Nop2	1	0	1	0	0	0	1	0	0	1	0	0	0	0	0	0	0	0	0	0	0	0	0	0	0	0	0	0	0
9902	Mrc2	1	0	1	1	0	0	0	0	0	0	0	0	0	0	0	0	0	0	0	0	0	0	0	0	0	0	0	0	0
10365	Klf2	0	1	0	1	0	0	0	1	0	0	0	0	0	0	0	0	0	0	0	0	0	0	0	0	0	0	0	0	0
116931	Med12l	0	1	0	1	0	0	0	1	0	0	0	0	0	0	0	0	0	0	0	0	0	0	0	0	0	0	0	0	0
4702	Ndufa8	1	0	1	0	1	0	0	0	0	0	0	0	0	0	0	0	0	0	0	0	0	0	0	1	0	0	0	0	0
26504	Cnnm4	0	1	0	1	0	0	0	1	0	0	0	0	0	0	0	0	0	0	0	0	0	0	0	0	0	0	0	0	0
80709	Akna	0	1	0	1	0	0	0	1	0	0	0	0	0	0	0	0	0	0	0	0	0	0	0	0	0	0	0	0	0
7015	Tert	0	1	0	1	0	0	0	1	0	0	0	0	0	0	0	0	0	0	0	0	0	0	0	0	0	0	0	0	0
353345	Gpr141	0	1	0	1	0	1	0	0	0	0	0	0	0	0	0	0	0	0	0	0	0	0	0	0	0	0	0	0	0
57537	Sorcs2	0	1	0	1	0	0	0	1	0	0	0	0	0	0	0	0	0	0	0	0	0	0	0	0	0	0	0	0	0
51478	Hsd17b7	0	1	0	1	0	0	0	1	0	0	0	0	0	0	0	0	0	1	0	0	0	0	0	0	0	1	0	0	0
8526	Dgke	0	1	0	1	0	0	0	1	0	0	0	0	0	1	0	0	0	0	0	0	0	0	0	0	0	0	0	0	0
5571	Prkag1	1	0	1	0	1	0	0	0	0	0	0	0	0	0	0	0	0	0	0	0	1	0	0	0	0	0	0	0	0
10965	Acot2	0	0	0	1	0	0	1	1	0	0	0	0	0	0	0	0	0	1	0	0	0	0	0	0	0	0	0	0	0
51663	Zfr	1	0	1	0	0	0	1	0	0	0	0	0	0	0	0	0	0	0	0	0	0	0	0	0	0	0	0	0	0
93986	Foxp2	0	1	0	1	0	0	0	1	0	0	0	0	0	0	0	0	0	0	0	0	0	0	0	0	0	0	0	0	0
1293	Col6a3	0	1	0	0	0	1	0	1	1	0	1	1	0	0	0	0	0	0	1	0	0	0	0	0	1	0	0	0	0
3234	Hoxd8	0	1	0	0	0	1	0	1	0	0	0	0	0	0	0	0	0	0	0	0	0	0	0	0	0	0	0	0	0
3679	Itga7	0	1	0	1	0	0	0	1	1	0	0	0	0	0	0	0	0	0	1	0	0	0	0	0	0	0	0	0	0
284	Angpt1	0	1	0	1	0	1	0	0	0	0	0	0	0	1	0	0	0	0	0	0	0	0	0	0	0	0	1	0	0
23368	Ppp1r13b	0	1	0	1	0	0	0	1	0	0	0	0	0	0	0	0	0	0	0	0	0	0	0	0	0	0	0	0	0
23347	Smchd1	1	0	1	0	1	0	0	0	0	0	0	0	0	0	0	0	0	0	0	0	0	0	0	0	0	0	0	0	0
84918	Lrp11	0	1	0	1	0	0	0	1	0	0	0	0	0	0	0	0	0	0	0	0	0	0	0	0	0	0	0	0	0
51115	Rmdn1	1	0	1	0	0	0	1	0	0	0	0	0	0	0	0	0	0	0	0	0	0	0	0	0	0	0	0	0	0
23677	Sh3bp4	0	1	0	1	0	0	0	1	0	0	0	0	0	0	1	0	0	0	0	0	0	0	0	0	0	0	0	0	0
1268	Cnr1	0	1	0	1	0	0	0	1	0	0	0	0	0	0	0	0	0	0	0	0	0	0	0	0	0	0	0	0	0
4254	Kitl	0	1	0	1	0	0	0	1	0	0	0	1	0	0	0	0	0	0	0	0	0	0	0	0	0	0	1	0	0
8140	Slc7a5	1	0	1	0	0	1	0	0	0	1	0	0	0	1	0	0	0	0	0	0	0	0	0	0	0	0	0	0	0
726	Capn5	0	1	0	1	0	1	0	0	1	0	0	0	0	0	0	0	0	0	0	0	0	0	0	0	0	0	0	0	0
4327	Mmp19	0	1	0	1	0	0	0	1	1	0	0	0	0	0	0	0	0	0	0	0	0	0	0	0	0	0	0	0	0
4306	Nr3c2	0	1	0	1	0	0	0	1	0	0	0	0	0	0	1	0	0	0	0	0	0	0	0	0	0	0	0	0	0
117154	Dach2	0	1	0	1	0	0	0	1	0	0	0	0	0	0	0	0	0	0	0	0	0	0	0	0	0	0	0	0	0
150771	Itpripl1	0	1	0	0	0	1	0	1	0	0	0	0	0	0	0	0	0	0	0	0	0	0	0	0	0	0	0	0	0
9066	Syt7	0	1	0	1	0	0	0	1	0	0	0	0	0	0	0	0	0	0	0	0	0	0	0	0	0	0	0	0	0
6196	Rps6ka2	0	1	0	1	0	1	0	0	0	0	1	1	0	0	1	0	0	0	0	1	0	0	0	0	0	0	0	0	0
5243	Abcb1a	0	1	0	1	0	1	0	0	0	0	0	0	0	0	0	0	0	0	0	0	0	0	0	0	0	0	0	0	0
11168	Psip1	0	0	0	0	1	0	1	1	0	0	0	0	0	0	0	0	0	0	0	0	0	0	0	0	0	0	0	0	0
8989	Trpa1	0	1	0	1	0	0	0	1	0	0	0	0	0	0	0	0	0	0	0	0	0	0	0	0	0	0	0	0	0
8522	Gas7	0	1	0	1	0	1	0	0	0	0	0	0	0	0	0	0	0	0	0	0	0	0	0	0	0	0	0	0	0
56256	Sertad4	0	1	0	1	0	0	0	1	0	0	0	0	0	0	0	0	0	0	0	0	0	0	0	0	0	0	0	0	0
11022	Tdrkh	0	1	0	1	0	0	0	1	0	0	0	0	0	0	0	0	0	0	0	0	0	0	0	0	0	0	0	0	0
7837	Pxdn	0	1	0	1	0	0	0	1	1	0	0	0	0	0	0	0	0	0	0	0	0	0	0	0	1	0	0	0	0
151230	Klhl23	0	1	0	1	0	0	0	1	0	0	0	0	0	0	0	0	0	0	0	0	0	0	0	0	0	0	0	0	0
4851	Notch1	0	1	0	1	0	0	0	1	0	0	0	0	0	0	0	0	0	0	0	0	0	0	0	0	0	0	1	0	0
57333	Rcn3	0	1	0	1	0	0	0	1	0	0	0	0	0	0	0	0	0	0	0	0	0	0	0	0	0	0	0	0	0
2119	Etv5	0	1	0	0	0	1	0	1	0	0	0	0	0	0	0	0	0	0	0	0	0	0	0	0	0	0	0	0	0
51326	Arf2	0	1	0	1	0	0	0	1	0	0	0	0	0	0	0	0	0	0	0	0	0	0	0	0	0	0	0	0	0
5789	Ptprd	0	1	0	1	0	0	0	1	0	0	0	0	0	0	0	0	0	0	0	0	0	0	0	0	0	0	0	0	0
55194	Eva1b	0	1	0	1	0	0	0	1	0	0	0	0	0	0	0	0	0	0	0	0	0	0	0	0	0	0	0	0	0
3267	Agfg1	1	0	1	0	1	0	0	0	0	0	0	0	0	0	0	0	0	0	0	0	1	0	0	0	0	0	0	0	0
56603	Cyp26b1	0	1	0	1	0	0	0	1	0	0	0	0	0	0	0	0	0	0	0	0	0	0	0	0	0	0	0	0	0
56944	Olfml3	0	1	0	0	0	1	0	1	0	0	0	0	0	0	0	0	0	0	0	0	0	0	0	0	0	0	0	0	0
10885	Wdr3	0	0	1	1	0	0	1	0	0	1	0	0	0	0	0	0	0	0	0	0	0	0	0	0	0	0	0	0	0
57221	Arfgef3	0	0	0	1	0	1	0	1	0	0	0	0	0	0	0	0	0	0	0	0	0	0	0	0	0	0	0	0	0
80830	Apol6	0	1	0	1	0	0	0	1	0	0	0	0	0	0	0	0	0	0	0	0	0	0	0	0	0	0	0	0	0
5865	Rab3b	0	1	0	1	0	0	0	1	0	0	0	0	0	0	0	0	0	0	0	0	0	0	0	0	0	0	0	0	0
6667	Gm4924;Zfp459;Gm10130;Zfp983;Zfp937;Zfp599;B230307C23Rik;6720489N17Rik	0	1	0	1	0	0	0	1	0	0	0	0	0	0	1	0	0	1	0	0	0	0	0	0	0	1	0	0	0
85476	Gfm1	0	0	1	1	1	0	0	0	0	1	0	0	0	0	0	0	0	0	0	0	0	0	0	0	0	0	0	0	0
151636	Dtx3l	0	1	0	1	0	0	0	1	0	0	0	0	0	0	0	0	0	0	0	0	0	0	0	0	0	0	0	0	0
3105	H2-K1	0	1	0	1	0	0	0	1	0	0	0	0	0	0	0	1	0	0	0	1	0	0	0	0	0	0	0	0	0
83938	Lrmda	0	1	0	1	0	0	0	1	0	0	0	0	0	0	0	0	0	0	0	0	0	0	0	0	0	0	0	0	0
6154	Rpl26	1	0	1	0	0	0	0	0	0	1	1	0	0	0	1	0	0	0	0	0	0	0	0	0	0	0	0	0	0
51421	Amotl2	0	1	0	1	0	0	0	0	0	0	0	0	0	0	0	0	0	0	0	0	0	0	0	0	0	0	0	0	0
57134	Man1c1	0	1	0	1	0	0	0	0	0	0	0	0	0	0	0	0	0	0	0	0	1	0	0	0	0	0	0	0	0
6597	Smarca4	1	0	1	0	0	0	0	0	0	0	1	0	0	0	0	0	0	0	0	1	0	0	0	0	0	0	0	0	0
9217	Vapb	1	0	1	0	0	0	0	0	0	0	0	0	1	0	0	0	0	1	0	0	0	0	0	0	0	0	0	0	0
10468	Fst	0	0	0	0	0	1	0	1	0	0	0	0	0	0	0	0	0	0	0	0	0	0	0	0	0	0	0	0	0
4313	Mmp2	0	1	0	0	0	0	0	1	1	0	1	0	0	0	0	0	0	0	0	1	0	0	1	0	0	0	0	0	0
80319	Cxxc4	0	1	0	0	0	0	0	1	0	0	0	0	0	0	0	0	0	0	0	0	0	0	0	0	0	0	0	0	0
978	Cda	0	1	0	1	0	0	0	0	0	0	0	0	0	0	0	1	0	0	0	0	0	0	0	0	0	0	0	0	0
57622	Lrfn1	0	1	0	0	0	0	0	1	0	0	0	0	0	0	0	0	0	0	0	0	0	0	0	0	0	0	0	0	0
120425	Jaml	0	0	0	1	0	1	0	0	0	0	0	0	0	1	0	0	0	0	0	0	0	0	0	0	0	0	0	0	0
25759	Shc2	0	1	0	0	0	0	0	1	0	0	0	1	0	0	0	0	0	0	0	0	0	0	0	0	0	0	1	0	0
8997	Kalrn	0	1	0	0	0	0	0	1	0	0	1	0	1	0	0	0	0	0	0	0	0	0	0	0	0	0	1	0	0
753	Ldlrad4	0	1	0	1	0	0	0	0	0	0	0	0	0	0	0	0	0	0	0	0	0	0	0	0	0	0	0	0	0
282996	Rbm20	0	1	0	1	0	0	0	0	0	0	0	0	0	0	0	0	0	0	0	0	0	0	0	0	0	0	0	0	0
7483	Wnt9a	0	1	0	1	0	0	0	0	0	0	0	0	0	0	0	0	0	0	0	0	0	0	0	0	0	0	0	0	0
23764	Maff	0	0	0	1	0	0	0	1	0	0	0	0	0	1	0	0	0	0	0	0	0	0	0	0	0	0	0	0	0
27071	Dapp1	0	1	0	1	0	0	0	0	0	0	0	0	0	0	0	0	0	0	0	0	0	0	0	0	0	0	0	0	0
145482	Ptgr2	0	0	1	0	0	0	1	0	0	0	0	0	0	0	0	0	0	1	0	0	0	0	0	0	0	0	0	0	0
6672	Sp100	0	1	0	1	0	0	0	0	0	0	0	0	0	0	0	0	0	0	0	1	0	0	0	0	0	0	0	0	0
2627	Gata6	0	0	0	1	0	0	0	1	0	0	0	0	0	1	0	0	0	0	0	0	0	0	0	0	0	0	0	0	0
55127	Heatr1	1	0	1	0	0	0	0	0	0	1	0	0	0	0	0	0	0	0	0	0	0	0	0	0	0	0	0	0	0
860	Runx2	0	1	0	1	0	0	0	0	0	0	0	0	0	0	0	0	0	0	0	0	0	0	0	0	0	0	0	0	0
3329	Hspd1	0	0	1	0	1	0	0	0	0	0	0	0	0	0	0	0	0	0	0	0	0	0	0	0	0	0	0	0	0
4637	Myl6	0	1	0	1	0	0	0	0	0	0	1	0	1	0	0	0	0	0	0	0	0	0	0	0	0	0	0	1	0
80228	Orai2	0	1	0	0	0	0	0	1	0	0	0	0	0	1	0	0	0	0	0	0	0	0	0	0	0	0	0	1	0
152559	Paqr3	0	0	0	1	0	0	0	1	0	0	0	0	0	0	0	0	0	0	0	0	0	0	0	0	0	0	1	0	0
221491	AI413582	0	1	0	0	0	0	0	1	0	0	0	0	0	0	0	0	0	0	0	0	0	0	0	0	0	0	0	0	0
203069	R3hcc1	0	1	0	1	0	0	0	0	0	0	0	0	0	0	0	0	0	0	0	0	0	0	0	0	0	0	0	0	0
8613	Plpp3	0	1	0	1	0	0	0	0	0	0	0	0	0	0	0	0	0	1	0	0	0	0	0	0	0	0	0	0	0
53827	Fxyd5	0	1	0	1	0	0	0	0	0	0	0	0	0	0	0	0	0	0	0	0	0	0	0	0	0	0	0	0	0
427	Asah1	1	0	0	0	0	0	1	0	0	0	0	0	0	0	0	1	0	1	0	0	0	0	0	0	0	0	0	0	0
4691	Ncl	0	0	1	0	0	0	1	0	0	1	0	0	0	0	0	0	0	0	0	0	0	0	0	0	0	0	0	0	0
5999	Rgs4	0	1	0	1	0	0	0	0	0	0	0	0	0	0	0	0	0	0	0	0	0	0	0	0	0	0	0	0	0
11224	Rpl35	1	0	1	0	0	0	0	0	0	1	1	0	0	0	1	0	0	0	0	0	0	0	0	0	0	0	0	0	0
5167	Enpp1	0	1	0	1	0	0	0	0	0	0	0	0	0	0	0	0	0	0	0	0	0	0	0	0	0	0	0	0	0
51678	Mpp6	1	0	0	0	0	0	1	0	0	0	0	0	0	0	0	0	0	0	0	0	0	0	0	0	0	0	0	0	0
196463	Plbd2	1	0	1	0	0	0	0	0	0	0	0	0	0	0	0	0	0	0	0	0	0	0	0	0	0	0	0	0	0
50807	Asap1	0	1	1	0	0	0	0	0	0	0	0	0	0	0	0	0	0	0	0	0	0	0	0	0	0	0	0	0	0
5118	Pcolce	0	0	1	0	1	0	0	0	1	0	0	0	0	0	0	0	0	0	0	0	0	0	0	0	0	0	0	0	0
113201	Golm2	0	1	0	0	0	0	0	1	0	0	0	0	0	0	0	0	0	0	0	0	0	0	0	0	0	0	0	0	0
976	Adgre5	0	1	0	1	0	0	0	0	0	0	0	0	0	0	0	1	0	0	0	0	0	0	0	0	0	0	0	0	0
152007	Glipr2	1	0	0	1	0	0	0	0	0	0	0	0	0	0	0	0	0	0	0	0	0	0	0	0	0	0	0	0	0
225	Abcd2	0	1	0	1	0	0	0	0	0	0	0	0	0	0	0	0	0	0	0	0	0	0	0	0	0	0	0	0	0
6217	Rps16	1	0	1	0	0	0	0	0	0	1	1	0	0	0	1	0	0	0	0	0	0	0	0	0	0	0	0	0	0
4736	Rpl10a	1	0	1	0	0	0	0	0	0	1	1	0	0	0	1	0	0	0	0	0	0	0	0	0	0	0	0	0	0
9953	Hs3st3b1	0	1	0	0	0	0	0	1	0	0	0	0	0	0	0	0	1	0	0	0	0	0	0	0	0	0	0	0	0
1240	Cmklr1	0	1	0	1	0	0	0	0	0	0	0	0	0	0	0	0	0	0	0	0	0	0	0	0	0	0	0	0	0
3936	Lcp1	0	1	0	1	0	0	0	0	0	0	0	0	0	0	0	0	0	0	0	1	0	0	0	0	0	0	0	0	0
51144	Hsd17b12	1	0	1	0	0	0	0	0	0	0	0	0	0	0	0	0	0	1	0	0	0	0	0	0	0	0	0	0	0
11080	Dnajb4	0	0	1	1	0	0	0	0	0	0	0	0	0	0	0	0	0	0	0	0	0	0	0	0	0	0	0	0	0
347404	Lancl3	0	1	0	1	0	0	0	0	0	0	0	0	0	0	0	0	0	0	0	0	0	0	0	0	0	0	0	0	0
154810	Amotl1	0	1	0	1	0	0	0	0	0	0	0	0	0	0	0	0	0	0	0	0	0	0	0	0	0	0	0	0	0
688	Klf5	0	1	0	1	0	0	0	0	0	0	0	0	0	0	0	0	0	0	0	0	0	0	0	0	0	0	0	0	0
8577	Tmeff1	0	1	0	1	0	0	0	0	0	0	0	0	0	0	0	0	0	0	0	0	0	0	0	0	0	0	0	0	0
26230	Tiam2	0	0	0	1	0	0	0	1	0	0	0	0	1	0	0	0	0	1	0	0	0	0	0	0	0	0	0	0	0
285973	Atg9b	0	0	0	1	0	0	0	1	0	0	0	0	0	0	0	0	0	0	0	0	0	0	0	0	0	0	0	0	0
10992	Sf3b2	1	0	1	0	0	0	0	0	0	1	0	0	0	0	0	0	0	0	0	0	0	0	0	0	0	0	0	0	0
80324	Pus1	0	0	1	0	0	0	1	0	0	1	0	0	0	0	0	0	0	0	0	0	0	0	0	0	0	0	0	0	0
143279	Hectd2	0	1	0	0	0	0	0	1	0	0	0	0	0	0	0	0	0	0	0	0	0	0	0	0	0	0	0	0	0
26002	Moxd1	0	0	0	1	0	0	0	1	0	0	0	0	0	0	0	0	0	0	0	0	0	0	0	0	0	0	0	0	0
55365	Tmem176a	0	1	0	1	0	0	0	0	0	0	0	0	0	0	0	0	0	0	0	0	0	0	0	0	0	0	0	0	0
7286	Tuft1	0	1	0	1	0	0	0	0	0	0	0	0	0	0	0	0	0	0	0	0	0	0	0	0	0	0	0	0	0
8027	Stam	0	0	0	0	1	0	1	0	0	0	0	1	1	0	0	0	0	0	1	0	1	0	0	0	0	0	0	0	0
10391	Coro2b	0	1	0	0	0	0	0	1	0	0	0	0	0	0	0	0	0	0	0	0	0	0	0	0	0	0	0	0	0
23160	Wdr43	0	0	1	0	0	0	1	0	0	1	0	0	0	0	0	0	0	0	0	0	0	0	0	0	0	0	0	0	0
1429	Cryz	0	0	0	0	1	0	1	0	0	0	0	0	0	0	0	0	0	0	0	0	0	0	0	0	0	0	0	0	0
8721	Edf1	1	0	1	0	0	0	0	0	0	0	0	0	0	0	0	0	0	0	0	0	0	0	0	0	0	0	0	0	0
346389	Macc1	0	1	0	0	0	0	0	1	0	0	0	0	0	0	0	0	0	0	0	0	0	0	0	0	0	0	0	0	0
10512	Sema3c	0	1	0	0	0	0	0	1	0	0	0	0	0	0	0	0	0	0	0	0	0	0	0	0	0	0	0	0	0
5311	Pkd2	0	1	0	0	0	0	0	1	0	0	0	0	0	0	0	0	0	0	0	0	0	0	0	0	0	0	0	0	0
57642	Col20a1	0	1	0	0	0	0	0	1	1	0	0	0	0	0	0	0	0	0	0	0	0	0	0	0	0	0	0	0	0
53834	Fgfrl1	0	1	0	0	0	0	0	1	0	0	0	1	0	0	0	0	0	0	0	0	0	0	0	0	0	0	0	0	0
22859	Adgrl1	0	0	0	0	0	1	0	1	0	0	0	0	0	0	0	0	0	0	0	0	0	0	0	0	0	0	0	0	0
8237	Usp11	0	0	0	1	0	0	0	1	0	0	0	0	0	0	0	0	0	0	0	0	0	0	0	0	0	0	0	0	0
167555	Fam151b	0	1	0	0	0	0	0	1	0	0	0	0	0	0	0	0	0	0	0	0	0	0	0	0	0	0	0	0	0
10730	Yme1l1	1	0	1	0	0	0	0	0	0	0	0	0	0	0	0	0	0	0	0	0	0	0	0	0	0	0	0	0	0
64332	Nfkbiz	0	0	0	1	0	0	0	1	0	0	0	0	0	0	0	0	0	0	0	0	0	0	0	0	0	0	0	0	0
201161	Cenpv	1	0	1	0	0	0	0	0	0	0	0	0	0	0	0	0	0	0	0	0	0	0	0	0	0	0	0	0	0
6139	Rpl17	1	0	1	0	0	0	0	0	0	1	1	0	0	0	1	0	0	0	0	0	0	0	0	0	0	0	0	0	0
90843	Tceal8	0	1	0	1	0	0	0	0	0	0	0	0	0	0	0	0	0	0	0	0	0	0	0	0	0	0	0	0	0
10100	Tspan2	0	1	0	1	0	0	0	0	0	0	0	0	0	0	0	0	0	0	0	0	0	0	0	0	0	0	0	0	0
7082	Tjp1	0	0	1	0	1	0	0	0	0	0	0	0	0	0	0	0	0	0	0	0	1	0	0	0	0	0	0	0	0
221092	Hnrnpul2	1	0	1	0	0	0	0	0	0	0	0	0	0	0	0	0	0	0	0	0	0	0	0	0	0	0	0	0	0
2286	Fkbp2	1	0	1	0	0	0	0	0	0	0	0	0	0	0	0	0	0	0	0	0	0	0	0	0	0	0	0	0	0
1191	Clu	0	1	0	0	0	0	0	1	0	0	0	0	0	1	0	0	0	0	0	0	0	0	0	0	0	0	0	0	0
9096	Tbx18	0	1	0	1	0	0	0	0	0	0	0	0	0	0	0	0	0	0	0	0	0	0	0	0	0	0	0	0	0
10576	Cct2	0	1	0	1	0	0	0	0	0	0	0	0	1	0	0	1	0	0	0	0	0	0	0	0	0	0	0	0	0
10901	Dhrs4	1	0	1	0	0	0	0	0	0	0	0	0	0	0	0	0	0	0	0	0	0	0	0	0	0	0	0	0	0
4931	Nvl	0	1	0	1	0	0	0	0	0	0	0	0	0	0	0	0	0	0	0	0	0	0	0	0	0	0	0	0	0
4000	Lmna	1	0	1	0	0	0	0	0	0	0	0	0	0	0	1	0	0	0	0	0	0	0	0	0	0	0	1	0	0
7571	Zfp612	0	1	0	0	0	0	0	1	0	0	0	0	0	0	0	0	0	0	0	0	0	0	0	0	0	0	0	0	0
55813	Utp6	1	0	1	0	0	0	0	0	0	1	0	0	0	0	0	0	0	0	0	0	0	0	0	0	0	0	0	0	0
79829	Naa40	0	0	1	0	0	0	1	0	0	0	0	0	0	0	0	0	0	0	0	0	0	0	0	0	0	0	0	0	0
91523	Pced1b	0	1	0	0	0	0	0	1	0	0	0	0	0	0	0	0	0	0	0	0	0	0	0	0	0	0	0	0	0
824	Capn2	0	1	0	0	0	0	1	0	1	0	0	0	0	0	0	0	0	0	0	0	0	0	0	0	0	0	0	0	0
23111	Spart	0	0	0	0	1	0	1	0	0	0	0	0	0	0	0	0	0	0	0	0	0	0	0	0	0	0	0	0	0
79783	Sugct	0	1	0	1	0	0	0	0	0	0	0	0	0	0	0	0	0	0	0	0	0	0	0	0	0	0	0	0	0
54442	Kctd5	0	1	0	1	0	0	0	0	0	0	0	0	0	0	0	0	0	0	0	0	0	0	0	0	0	0	0	0	0
84034	Emilin2	0	1	0	1	0	0	0	0	1	0	0	0	0	0	0	0	0	0	0	0	0	1	0	0	0	0	0	0	0
116039	Osr2	0	0	0	1	0	0	0	1	0	0	0	0	0	0	0	0	0	0	0	0	0	0	0	0	0	0	0	0	0
338382	Rab7b	0	1	0	1	0	0	0	0	0	0	0	0	0	0	0	0	0	0	0	0	1	0	0	0	0	0	0	0	0
4722	Ndufs3	1	0	1	0	0	0	0	0	0	0	0	0	1	0	0	0	0	0	0	0	0	0	0	1	0	0	0	0	0
4665	Nab2	0	0	1	0	1	0	0	0	0	0	1	1	0	0	0	0	0	0	0	0	0	0	0	0	0	0	0	0	0
4008	Lmo7	0	0	0	1	0	0	0	1	0	0	0	0	0	0	0	0	0	0	0	0	0	0	0	0	0	0	1	0	0
9580	Sox13	0	0	0	1	0	0	0	1	0	0	0	0	0	0	0	0	0	0	0	0	0	0	0	0	0	0	0	0	0
9926	Lpgat1	0	1	0	1	0	0	0	0	0	0	0	0	0	0	0	0	0	1	0	0	0	0	0	0	0	0	0	0	0
84957	Relt	0	0	0	1	0	0	0	1	0	0	0	0	0	0	0	0	0	0	0	0	0	0	0	0	0	0	0	0	0
9524	Tecr	1	0	1	0	0	0	0	0	0	0	0	0	0	0	0	0	0	1	0	0	0	0	0	0	0	0	0	0	0
4848	Cnot2	0	1	0	1	0	0	0	0	0	0	0	0	0	0	0	0	0	0	0	0	0	0	0	0	0	0	0	0	0
9475	Rock2	0	0	1	0	0	0	1	0	0	0	1	1	1	0	0	0	0	0	0	0	0	0	0	0	0	0	0	0	0
57491	Ahrr	0	1	0	1	0	0	0	0	0	0	0	0	0	0	0	0	0	1	0	0	0	0	0	0	0	0	0	0	0
4753	Nell2	0	1	0	1	0	0	0	0	0	0	1	0	0	0	0	0	0	0	0	0	0	0	0	0	0	0	0	0	0
10961	Erp29	0	1	0	0	1	0	0	0	0	0	0	0	0	0	0	0	0	0	0	0	0	0	0	0	0	0	0	0	0
29934	Snx12	1	0	0	0	0	0	1	0	0	0	0	0	0	0	0	0	0	0	0	0	0	0	0	0	0	0	0	0	0
4052	Ltbp1	0	1	0	1	0	0	0	0	1	0	0	0	0	0	0	0	0	0	0	0	0	1	1	0	0	0	0	0	0
140707	Bri3bp	0	1	0	1	0	0	0	0	0	0	0	0	0	0	0	0	0	0	0	0	0	0	0	0	0	0	0	0	0
9060	Papss2	0	1	0	1	0	0	0	0	0	0	0	0	0	0	0	0	1	0	0	0	0	0	0	0	0	0	0	0	0
9349	Rpl23	1	0	1	0	0	0	0	0	0	1	1	0	0	0	1	0	0	0	0	0	0	0	0	0	0	0	0	0	0
6556	Slc11a1	0	0	0	1	0	0	0	1	0	0	0	0	0	0	0	1	0	0	0	0	0	0	0	0	0	0	0	0	0
950	Scarb2	1	0	1	0	0	0	0	0	0	0	0	0	0	0	0	0	0	0	0	0	1	0	0	0	0	0	0	0	0
2335	Fn1	0	0	1	0	0	0	1	0	1	0	0	1	0	1	0	0	0	0	1	1	0	1	1	0	0	0	1	0	0
161145	Tmem229b	0	1	0	0	0	0	0	1	0	0	0	0	0	0	0	0	0	0	0	0	0	0	0	0	0	0	0	0	0
10845	Clpx	1	0	1	0	0	0	0	0	0	0	0	0	0	0	0	0	0	0	0	0	0	0	0	0	0	0	0	0	0
10199	Mphosph10	1	0	1	0	0	0	0	0	0	1	0	0	0	0	0	0	0	0	0	0	0	0	0	0	0	0	0	0	0
56243	Etl4	0	0	0	1	0	1	0	0	0	0	0	0	0	0	0	0	0	0	0	0	0	0	0	0	0	0	0	0	0
272	Ampd3	0	0	0	1	0	0	0	1	0	0	0	0	0	0	0	1	0	0	0	0	0	0	0	0	0	0	0	0	0
55450	Camk2n1	0	0	0	1	0	0	0	1	0	0	0	0	0	0	0	0	0	0	0	0	0	0	0	0	0	0	0	0	0
134510	Ublcp1	1	0	0	0	1	0	0	0	0	0	0	0	0	0	0	0	0	0	0	0	0	0	0	0	0	0	0	0	0
8503	Pik3r3	0	1	0	0	0	0	0	1	0	0	1	1	1	1	0	0	0	1	0	1	0	0	0	0	0	0	1	0	0
57003	Ccdc47	1	0	1	0	0	0	0	0	0	0	0	0	0	0	0	0	0	0	0	0	0	0	0	0	0	0	0	0	0
90488	Tmem263	1	1	0	0	0	0	0	0	0	0	0	0	0	0	0	0	0	0	0	0	0	0	0	0	0	0	0	0	0
54757	Fam20a	0	1	0	0	0	0	0	1	0	0	0	0	0	0	0	0	0	0	0	0	0	0	1	0	0	0	0	0	0
51201	Zdhhc2	0	1	0	1	0	0	0	0	0	0	0	0	0	0	0	0	0	0	0	0	0	0	0	0	0	0	0	0	0
9244	Crlf1	0	0	0	1	0	1	0	0	0	0	0	0	0	0	0	0	0	0	0	1	0	0	0	0	0	0	0	0	0
5058	Pak1	0	1	0	1	0	0	0	0	0	0	1	1	1	0	0	0	0	0	0	0	0	0	0	0	0	0	1	1	0
64135	Ifih1	0	1	0	0	0	0	0	1	0	0	0	0	0	0	0	0	0	0	0	0	0	0	0	0	0	0	0	0	0
10449	Acaa2	1	0	1	0	0	0	0	0	0	0	0	0	0	0	0	0	0	1	0	0	0	0	0	0	0	0	0	0	0
5463	Pou6f1	0	1	0	0	0	0	0	1	0	0	0	0	0	0	0	0	0	0	0	0	0	0	0	0	0	0	0	0	0
25973	Pars2	0	1	0	1	0	0	0	0	0	0	0	0	0	0	0	0	0	0	0	0	0	0	0	0	0	0	0	0	0
64798	Deptor	0	1	0	1	0	0	0	0	0	0	0	0	0	0	0	0	0	0	0	0	0	0	0	0	0	0	0	0	0
55707	Necap2	0	0	1	0	0	0	1	0	0	0	0	0	0	0	0	0	0	0	0	0	1	0	0	0	0	0	0	0	0
23394	Adnp	1	0	1	0	0	0	0	0	0	0	0	0	0	0	0	0	0	0	0	0	0	0	0	0	0	0	0	0	0
10628	Txnip	0	1	0	0	0	0	0	1	0	0	0	0	0	0	1	0	0	0	0	0	0	0	0	0	0	0	0	0	0
6051	Rnpep	0	0	0	1	0	0	0	1	0	0	0	0	0	0	0	0	0	0	0	0	0	0	0	0	0	0	0	0	0
6209	Rps15	1	0	1	0	0	0	0	0	0	1	1	0	0	0	1	0	0	0	0	0	0	0	0	0	0	0	0	0	0
79148	Mmp28	0	1	0	1	0	0	0	0	0	0	0	0	0	0	0	0	0	0	0	0	0	0	0	0	0	0	0	0	0
7150	Top1	1	0	1	0	0	0	0	0	0	0	0	0	0	0	0	0	0	0	0	0	0	0	0	0	0	0	0	0	0
22882	Zhx2	0	1	0	0	0	0	0	1	0	0	0	0	0	0	0	0	0	0	0	0	0	0	0	0	0	0	0	0	0
4001	Lmnb1	1	0	1	0	0	0	0	0	0	0	0	0	1	0	1	0	0	0	0	1	0	0	0	0	0	0	0	0	0
9816	Urb2	1	0	1	0	0	0	0	0	0	0	0	0	0	0	0	0	0	0	0	0	0	0	0	0	0	0	0	0	0
7102	Tspan7	0	1	0	1	0	0	0	0	0	0	0	0	0	1	0	0	0	0	0	0	0	0	0	0	0	0	0	0	0
23324	Man2b2	1	0	1	0	0	0	0	0	0	0	0	0	0	0	0	0	1	0	0	0	0	0	0	0	0	0	0	0	0
84628	Ntng2	0	1	0	0	0	0	0	1	0	0	0	0	0	0	0	0	0	0	0	0	0	0	0	0	0	0	0	0	0
6218	Rps17	1	0	1	0	0	0	0	0	0	1	1	0	0	0	1	0	0	0	0	0	0	0	0	0	0	0	0	0	0
4729	Ndufv2	1	0	1	0	0	0	0	0	0	0	0	0	0	0	0	0	0	0	0	0	0	0	0	1	0	0	0	0	0
2561	Gabrb2	0	0	0	1	0	0	0	1	0	0	0	1	0	0	0	0	0	0	0	0	0	0	0	0	0	0	0	0	0
6604	Smarcd3	0	1	0	0	0	0	0	1	0	0	0	0	0	0	1	0	0	1	0	0	0	0	0	0	0	0	0	0	0
9111	Nmi	0	1	0	1	0	0	0	0	0	0	0	0	0	0	0	0	0	0	0	0	0	0	0	0	0	0	0	0	0
22908	Sacm1l	1	0	1	0	0	0	0	0	0	0	0	0	0	0	0	0	0	1	0	0	0	0	0	0	0	0	0	0	0
27286	Srpx2	0	1	0	0	0	0	0	1	0	0	0	0	0	0	0	0	0	0	0	0	0	0	0	0	0	0	0	0	0
254827	Naaladl2	0	0	0	1	0	0	0	1	0	0	0	0	0	0	0	0	0	0	0	0	0	0	0	0	0	0	0	0	0
3326	Hsp90ab1	0	0	0	0	1	0	1	0	0	0	1	0	1	0	1	1	0	0	0	0	0	0	0	0	0	0	0	0	0
55366	Lgr4	0	1	0	0	0	1	0	0	0	0	0	0	0	0	0	0	0	0	0	0	0	0	0	0	0	0	0	0	0
1340	Cox6b1	1	0	1	0	0	0	0	0	0	0	0	0	0	0	1	0	0	0	0	0	0	0	0	1	0	0	0	0	0
29780	Parvb	0	1	0	0	1	0	0	0	0	0	0	0	0	0	0	0	0	0	0	0	0	0	0	0	0	0	0	0	0
2644	Gchfr	0	1	0	1	0	0	0	0	0	0	0	0	0	0	0	0	0	0	0	0	0	0	0	0	0	0	0	0	0
6191	Rps4x	1	0	1	0	0	0	0	0	0	1	1	0	0	0	1	0	0	0	0	0	0	0	0	0	0	0	0	0	0
23560	Gtpbp4	1	0	1	0	0	0	0	0	0	0	0	0	0	0	0	0	0	0	0	0	0	0	0	0	0	0	0	0	0
56892	Tcim	0	1	0	0	0	0	0	1	0	0	0	0	0	0	0	0	0	0	0	0	0	0	0	0	0	0	0	0	0
3157	Hmgcs1	0	1	0	1	0	0	0	0	0	0	0	0	0	0	0	0	0	1	0	0	0	0	0	0	0	1	0	0	0
11078	Triobp	0	1	0	1	0	0	0	0	0	0	0	0	0	0	0	0	0	0	0	0	0	0	0	0	0	0	0	0	0
9868	Tomm70	1	0	1	0	0	0	0	0	0	0	0	0	0	0	0	0	0	0	0	0	0	0	0	0	0	0	0	0	0
80222	Tars2	0	0	1	0	1	0	0	0	0	1	0	0	0	0	0	0	0	0	0	0	0	0	0	0	0	0	0	0	0
6152	Rpl24	1	0	1	0	0	0	0	0	0	1	1	0	0	0	1	0	0	0	0	0	0	0	0	0	0	0	0	0	0
9948	Wdr1	0	1	0	1	0	0	0	0	0	0	0	0	0	1	0	0	0	0	0	0	0	0	0	0	0	0	0	0	0
1339	Cox6a2	0	0	0	1	0	0	0	1	0	0	0	0	0	0	0	0	0	0	0	0	0	0	0	0	0	0	0	0	0
79668	Parp8	0	1	0	1	0	0	0	0	0	0	0	0	0	0	0	0	0	0	0	0	0	0	0	0	0	0	0	0	0
115004	Cgas	0	1	0	1	0	0	0	0	0	0	0	0	0	0	0	0	0	0	0	0	0	0	0	0	0	0	0	0	0
2010	Emd	1	0	1	0	0	0	0	0	0	0	0	0	1	0	0	0	0	0	0	0	0	0	0	0	0	0	0	0	0
10273	Stub1	0	0	0	0	1	0	1	0	0	0	0	1	0	0	0	0	0	0	0	0	0	0	0	0	0	0	1	0	0
7087	Icam5	0	1	0	1	0	0	0	0	1	0	0	0	0	0	0	0	0	0	1	0	0	0	0	0	0	0	0	0	0
10939	Afg3l2	1	0	1	0	0	0	0	0	0	0	0	0	0	0	0	0	0	0	0	0	0	0	0	0	0	0	0	0	0
9194	Slc16a7	0	1	0	0	0	0	0	1	0	0	0	0	0	0	0	0	0	0	0	0	0	0	0	0	0	0	0	0	0
222234	Fam185a	0	1	0	0	0	0	0	1	0	0	0	0	0	0	0	0	0	0	0	0	0	0	0	0	0	0	0	0	0
2235	Fech	1	0	0	0	1	0	0	0	0	0	0	0	0	0	0	0	0	0	0	0	0	0	0	0	0	0	0	0	0
8544	Pir	0	0	1	0	0	0	1	0	0	0	0	0	0	0	0	0	0	0	0	0	0	0	0	0	0	0	0	0	0
87	Actn1	0	1	0	1	0	0	0	0	1	0	0	0	1	1	0	0	0	0	1	0	0	0	0	0	0	0	0	0	0
1408	Cry2	0	1	0	1	0	0	0	0	0	0	0	0	0	0	0	0	0	0	0	0	0	0	0	0	0	0	0	0	0
9620	Celsr1	0	1	0	0	0	0	0	1	0	0	0	0	0	0	0	0	0	0	0	0	0	0	0	0	0	0	0	0	0
55924	Inka2	0	1	0	1	0	0	0	0	0	0	0	0	0	0	0	0	0	0	0	0	0	0	0	0	0	0	0	0	0
6793	Stk10	0	0	0	0	1	0	1	0	0	0	0	0	1	0	0	1	0	0	0	0	0	0	0	0	0	0	0	0	0
4026	Lpp	0	1	0	1	0	0	0	0	0	0	0	0	0	0	0	0	0	0	0	0	0	0	0	0	0	0	0	0	0
54432	Yipf1	0	0	0	1	0	0	0	1	0	0	0	0	0	0	0	0	0	0	0	0	0	0	0	0	0	0	0	0	0
26507	Cnnm1	0	1	0	1	0	0	0	0	0	0	0	0	0	0	0	0	0	0	0	0	0	0	0	0	0	0	0	0	0
747	Dagla	0	1	0	1	0	0	0	0	0	0	0	0	0	1	0	0	0	0	0	0	0	0	0	0	0	0	0	0	0
84935	Medag	0	0	0	1	0	1	0	0	0	0	0	0	0	0	0	0	0	0	0	0	0	0	0	0	0	0	0	0	0
60437	Cdh26	0	1	0	1	0	0	0	0	0	0	0	0	0	0	0	0	0	0	0	0	0	0	0	0	0	0	0	0	0
29119	Ctnna3	0	1	0	1	0	0	0	0	0	0	0	0	0	0	0	0	0	0	0	0	0	0	0	0	0	0	0	0	0
54680	Znhit6	0	0	1	0	0	0	1	0	0	0	0	0	0	0	0	0	0	0	0	0	0	0	0	0	0	0	0	0	0
493	Atp2b4	0	1	0	1	0	0	0	0	0	0	0	0	0	1	0	0	0	0	0	0	0	0	0	0	0	0	0	1	0
84144	Syde2	0	1	0	1	0	0	0	0	0	0	0	0	1	0	0	0	0	0	0	0	0	0	0	0	0	0	0	0	0
25929	Gemin5	0	0	0	0	1	0	1	0	0	0	0	0	0	0	0	0	0	0	0	0	0	0	0	0	0	0	0	0	0
5317	Pkp1	0	1	0	1	0	0	0	0	0	0	0	0	0	0	0	1	0	0	0	0	0	0	0	0	0	0	0	0	0
9734	Hdac9	0	1	0	0	0	1	0	0	0	0	0	0	0	0	0	0	0	0	0	0	0	0	0	0	0	0	1	0	0
92140	Mtdh	1	0	1	0	0	0	0	0	0	0	0	0	0	0	0	0	0	0	0	0	0	0	0	0	0	0	0	0	0
8904	Cpne1	0	0	1	0	0	0	1	0	0	0	0	0	0	0	0	1	0	1	0	0	0	0	0	0	0	0	0	0	0
51313	Gask1b	0	0	0	1	0	0	0	1	0	0	0	0	0	0	0	0	0	0	0	0	0	0	0	0	0	0	0	0	0
79774	Grtp1	0	1	0	1	0	0	0	0	0	0	0	0	0	0	0	0	0	0	0	0	0	0	0	0	0	0	0	0	0
81035	Colec12	0	1	0	0	0	0	0	1	0	0	0	0	0	0	0	0	0	0	0	0	1	0	0	0	1	0	0	0	0
3075	Cfh	0	1	0	1	0	0	0	0	0	0	0	0	0	0	0	0	0	0	0	0	0	0	0	0	0	0	0	0	0
23	Abcf1	1	0	1	0	0	0	0	0	0	0	0	0	0	0	0	0	0	0	0	0	0	0	0	0	0	0	0	0	0
80273	Grpel1	0	0	0	0	1	0	1	0	0	0	0	0	0	0	0	0	0	0	0	0	0	0	0	0	0	0	0	0	0
1741	Dlg3	0	0	0	1	0	0	0	1	0	0	1	0	0	0	0	0	0	0	0	0	0	0	0	0	0	0	1	0	0
118987	Pdzd8	0	0	1	0	1	0	0	0	0	0	0	0	0	0	0	0	0	0	0	0	0	0	0	0	0	0	0	0	0
55325	Ufsp2	1	0	1	0	0	0	0	0	0	0	0	0	0	0	0	0	0	0	0	0	0	0	0	0	0	0	0	0	0
140733	Macrod2	0	1	0	0	0	0	0	1	0	0	0	0	0	0	0	0	0	0	0	0	0	0	0	0	0	0	0	0	0
6184	Rpn1	1	0	1	0	0	0	0	0	0	1	0	0	0	0	0	0	0	0	0	0	0	0	0	0	0	0	0	0	0
1603	Dad1	1	0	1	0	0	0	0	0	0	0	0	0	0	0	0	0	0	0	0	0	0	0	0	0	0	0	0	0	0
100132074	Foxo6	0	1	0	1	0	0	0	0	0	0	0	0	0	0	0	0	0	0	0	0	0	0	0	0	0	0	0	0	0
1628	Dbp	0	1	0	1	0	0	0	0	0	0	0	0	0	0	0	0	0	0	0	0	0	0	0	0	0	0	0	0	0
25923	Atl3	1	0	1	0	0	0	0	0	0	0	0	0	0	0	0	0	0	0	0	0	0	0	0	0	0	0	0	0	0
54756	Il17rd	0	0	0	1	0	0	0	1	0	0	0	0	0	0	0	0	0	0	0	0	0	0	0	0	0	0	1	0	0
362	Aqp5	0	1	0	1	0	0	0	0	0	0	0	0	0	0	0	0	0	0	0	0	0	0	0	0	0	0	0	0	0
9610	Rin1	0	0	0	0	1	0	1	0	0	0	0	0	0	0	0	0	0	0	0	0	1	0	0	0	0	0	0	0	0
23277	Cluh	0	0	1	0	0	0	1	0	0	0	0	0	0	0	0	0	0	0	0	0	0	0	0	0	0	0	0	0	0
2729	Gclc	1	0	1	0	0	0	0	0	0	0	0	0	0	0	0	0	0	0	0	0	0	0	0	0	0	0	0	0	0
5209	Pfkfb3	0	0	0	1	0	0	0	1	0	0	0	0	0	0	0	0	1	0	0	0	0	0	0	0	0	0	0	0	0
139324	Hdx	0	1	0	1	0	0	0	0	0	0	0	0	0	0	0	0	0	0	0	0	0	0	0	0	0	0	0	0	0
23154	Ncdn	1	0	1	0	0	0	0	0	0	0	0	0	0	0	0	0	0	0	0	0	0	0	0	0	0	0	0	0	0
2926	Grsf1	0	0	0	0	1	0	1	0	0	0	0	0	0	0	0	0	0	0	0	0	0	0	0	0	0	0	0	0	0
11173	Adamts7	0	1	0	0	0	0	0	1	0	0	0	0	0	0	0	0	0	0	0	0	0	0	0	0	0	0	0	0	0
84446	Brsk1	0	1	0	0	0	0	0	1	0	0	0	0	0	0	0	0	0	0	0	0	0	0	0	0	0	0	0	0	0
442213	Ptchd4	0	0	0	1	0	1	0	0	0	0	0	0	0	0	0	0	0	0	0	0	0	0	0	0	0	0	0	0	0
60529	Alx4	0	0	0	0	0	1	0	1	0	0	0	0	0	0	0	0	0	0	0	0	0	0	0	0	0	0	0	0	0
6193	Rps5	1	0	1	0	0	0	0	0	0	1	1	0	0	0	1	0	0	0	0	0	0	0	0	0	0	0	0	0	0
57459	Gatad2b	1	0	1	0	0	0	0	0	0	0	0	0	0	0	0	0	0	0	0	0	0	0	0	0	0	0	1	0	0
6236	Rrad	0	1	0	1	0	0	0	0	0	0	0	1	0	0	0	0	0	0	0	0	0	0	0	0	0	0	0	0	0
3600	Il15	0	1	0	1	0	0	0	0	0	0	0	0	0	0	0	0	0	0	0	1	0	0	0	0	0	0	0	0	0
5165	Pdk3	0	0	0	0	1	0	0	1	0	0	0	0	0	0	0	0	0	0	0	0	0	0	0	0	0	0	0	0	0
51110	Lactb2	1	0	0	0	0	0	1	0	0	0	0	0	0	0	0	0	0	0	0	0	0	0	0	0	0	0	0	0	0
57142	Rtn4	1	0	1	0	0	0	0	0	0	0	0	0	0	0	0	0	0	0	0	0	0	0	0	0	0	0	0	0	0
126393	Hspb6	0	1	0	1	0	0	0	0	0	0	0	0	0	0	0	0	0	0	0	0	0	0	0	0	0	0	0	0	0
6507	Slc1a3	0	1	0	0	0	0	0	1	0	0	0	0	0	0	0	0	0	0	0	0	0	0	0	0	0	0	0	0	0
23043	Tnik	0	1	0	1	0	0	0	0	0	0	0	0	0	0	1	0	0	0	0	0	0	0	0	0	0	0	0	0	0
9554	Sec22b	1	0	1	0	0	0	0	0	0	0	0	0	0	0	0	0	0	0	0	0	1	0	0	0	0	0	0	0	0
4256	Mgp	0	1	0	1	0	0	0	0	0	0	0	0	0	0	0	0	0	0	0	0	0	0	0	0	0	0	0	0	0
4355	Mpp2	0	1	0	1	0	0	0	0	0	0	0	0	0	0	0	0	0	0	0	0	0	0	0	0	0	0	0	0	0
29957	Slc25a24	1	0	0	0	0	0	1	0	0	0	0	0	0	0	0	0	0	0	0	0	0	0	0	0	0	0	0	0	0
161176	Syne3	0	1	0	1	0	0	0	0	0	0	0	0	0	0	0	0	0	0	0	0	0	0	0	0	0	0	0	0	0
57214	Cemip	0	1	0	0	0	0	0	1	0	0	0	0	0	0	0	0	1	0	0	0	0	0	0	0	0	0	0	0	0
54625	Parp14	0	1	0	0	0	0	0	1	0	0	0	0	0	0	0	0	0	0	0	0	0	0	0	0	0	0	0	0	0
10528	Nop56	1	0	1	0	0	0	0	0	0	1	0	0	0	0	0	0	0	0	0	0	0	0	0	0	0	0	0	0	0
27031	Nphp3	0	1	0	1	0	0	0	0	0	0	0	0	0	0	0	0	0	0	0	0	0	0	0	0	0	0	0	0	0
4695	Ndufa2	1	0	1	0	0	0	0	0	0	0	0	0	0	0	0	0	0	0	0	0	0	0	0	1	0	0	0	0	0
165215	Fam171b	0	0	0	1	0	0	0	1	0	0	0	0	0	0	0	0	0	0	0	0	0	0	0	0	0	0	0	0	0
81502	H13	0	1	0	0	0	0	0	1	0	0	0	0	0	0	1	0	0	0	0	0	0	0	0	0	0	0	0	0	0
3295	Hsd17b4	1	0	1	0	0	0	0	0	0	0	0	0	0	0	0	0	0	1	0	0	0	0	0	0	0	0	0	0	0
8565	Yars	0	0	0	0	1	0	1	0	0	0	0	0	0	0	0	0	0	0	0	0	0	0	0	0	0	0	0	0	0
2674	Gfra1	0	1	0	1	0	0	0	0	0	0	1	0	0	0	0	0	0	0	0	0	0	0	0	0	0	0	1	0	0
201501	Zbtb7c	0	1	0	1	0	0	0	0	0	0	0	0	0	0	0	0	0	0	0	0	0	0	0	0	0	0	0	0	0
56624	Asah2	0	1	0	1	0	0	0	0	0	0	0	0	0	0	0	0	0	1	0	0	0	0	0	0	0	0	0	0	0
26469	Ptpn18	0	1	0	1	0	0	0	0	0	0	0	1	0	0	0	0	0	0	0	1	0	0	0	0	0	0	0	0	0
3801	Kifc3	0	1	0	0	0	0	0	1	0	0	0	0	0	0	0	0	0	0	0	0	0	0	0	0	0	0	0	0	0
5413	Septin5	1	0	1	0	0	0	0	0	0	0	0	0	0	0	0	0	0	0	0	0	0	0	0	0	0	0	0	0	0
59286	Ubl5	0	0	1	0	1	0	0	0	0	0	0	0	0	0	0	0	0	0	0	0	0	0	0	0	0	0	0	0	0
11155	Ldb3	0	1	0	1	0	0	0	0	0	0	0	0	0	0	0	0	0	0	0	0	0	0	0	0	0	0	0	0	0
9520	Npepps	0	0	1	0	1	0	0	0	0	0	0	0	0	0	0	0	0	0	0	0	0	0	0	0	0	0	0	0	0
7004	Tead4	0	1	0	1	0	0	0	0	0	0	0	0	0	0	0	0	0	0	0	0	0	0	0	0	0	0	0	0	0
256691	Mamdc2	0	1	0	0	0	0	0	1	0	0	0	0	0	0	0	0	0	0	0	0	0	0	0	0	0	0	0	0	0
9943	Oxsr1	1	0	0	0	1	0	0	0	0	0	0	0	0	0	0	0	0	0	0	0	0	0	0	0	0	0	0	0	0
10580	Sorbs1	0	1	0	1	0	0	0	0	0	0	0	0	0	0	0	0	0	0	0	0	0	0	0	0	0	0	0	1	0
140609	Nek7	1	0	1	0	0	0	0	0	0	0	0	0	0	0	0	0	0	0	0	0	0	0	0	0	0	0	0	0	0
11238	Car5b	0	1	0	1	0	0	0	0	0	0	0	0	0	0	0	0	0	0	0	0	0	0	0	0	0	0	0	0	0
9377	Cox5a	1	0	1	0	0	0	0	0	0	0	0	0	0	0	1	0	0	0	0	0	0	0	0	1	0	0	0	0	0
5796	Ptprk	0	1	0	1	0	0	0	0	0	0	0	1	0	0	0	0	0	0	0	0	0	0	0	0	0	0	0	0	0
50650	Arhgef3	0	1	0	1	0	0	0	0	0	0	0	0	1	0	0	0	0	0	0	0	0	0	0	0	0	0	0	0	0
55720	Tsr1	1	0	1	0	0	0	0	0	0	1	0	0	0	0	0	0	0	0	0	0	0	0	0	0	0	0	0	0	0
53343	Nudt9	1	0	1	0	0	0	0	0	0	0	0	0	0	0	0	0	0	0	0	0	0	0	0	0	0	0	0	0	0
9699	Rims2	0	1	0	0	0	1	0	0	0	0	0	0	0	0	0	0	0	0	0	0	0	0	0	0	0	0	0	0	0
10092	Arpc5	0	1	0	1	0	0	0	0	0	0	1	0	1	0	0	1	0	0	0	0	1	0	0	0	0	0	0	0	0
23336	Synm	0	1	0	1	0	0	0	0	0	0	0	0	0	0	0	0	0	0	0	0	0	0	0	0	0	0	0	0	0
387758	Fibin	0	1	0	1	0	0	0	0	0	0	0	0	0	0	0	0	0	0	0	0	0	0	0	0	0	0	0	0	0
2788	Gng7	0	1	0	1	0	0	0	0	0	0	0	0	0	1	0	0	0	0	0	0	0	0	0	0	0	0	0	0	0
9353	Slit2	0	1	0	1	0	0	0	0	0	0	1	0	0	0	0	0	0	0	0	0	0	0	0	0	0	0	0	0	0
790	Cad	0	0	0	0	1	0	1	0	0	0	0	0	0	0	0	0	0	0	0	0	0	0	0	0	0	0	0	0	0
5549	Prelp	0	0	0	1	0	0	0	1	0	0	0	0	0	0	0	0	1	0	0	0	0	0	0	0	0	0	0	0	0
347902	Amigo2	0	1	0	0	0	0	0	1	0	0	0	0	1	0	0	0	0	0	0	0	0	0	0	0	0	0	0	0	0
1389	Crebl2	0	1	0	1	0	0	0	0	0	0	0	0	0	0	0	0	0	0	0	0	0	0	0	0	0	0	0	0	0
359845	Rflnb	0	1	0	1	0	0	0	0	0	0	0	0	0	0	0	0	0	0	0	0	0	0	0	0	0	0	0	0	0
10654	Pmvk	0	1	0	1	0	0	0	0	0	0	0	0	0	0	0	0	0	1	0	0	0	0	0	0	0	1	0	0	0
670	Bphl	1	0	0	0	0	0	1	0	0	0	0	0	0	0	0	0	0	0	0	0	0	0	0	0	0	0	0	0	0
170506	Dhx36	1	0	1	0	0	0	0	0	0	0	0	0	0	0	0	0	0	0	0	0	0	0	0	0	0	0	0	0	0
7005	Tead3	0	0	0	1	0	0	0	1	0	0	0	0	0	0	0	0	0	0	0	0	0	0	0	0	0	0	0	0	0
1643	Ddb2	0	0	0	1	0	0	0	1	0	0	0	0	0	0	0	0	0	0	0	0	0	0	0	0	0	0	0	0	0
6693	Spn	0	1	0	1	0	0	0	0	0	0	0	0	0	1	0	0	0	0	0	0	0	0	0	0	0	0	0	0	0
8654	Pde5a	0	0	0	1	0	0	0	1	0	0	0	0	1	1	0	0	0	0	0	0	0	0	0	0	0	0	0	0	0
2290	Foxg1	0	0	0	1	0	0	0	1	0	0	0	0	0	0	0	0	0	0	0	0	0	0	0	0	0	0	0	0	0
221981	Thsd7a	0	1	0	1	0	0	0	0	0	0	0	0	0	0	0	0	0	0	0	0	0	0	0	0	0	0	0	0	0
23446	Slc44a1	0	1	0	1	0	0	0	0	0	0	0	0	0	0	0	0	0	1	0	0	0	0	0	0	0	0	0	0	0
57568	Sipa1l2	0	0	0	0	0	1	0	1	0	0	0	0	0	0	0	0	0	0	0	0	0	0	0	0	0	0	0	0	0
5168	Enpp2	0	1	0	1	0	0	0	0	0	0	0	0	0	0	0	0	0	0	0	0	0	0	0	0	0	0	0	0	0
6352	Ccl5	0	1	0	1	0	0	0	0	0	0	0	0	0	0	0	0	0	0	0	1	0	0	0	0	0	0	0	0	0
1793	Dock1	1	0	1	0	0	0	0	0	0	0	1	1	1	1	0	0	0	0	0	0	0	0	0	0	0	0	0	0	0
3710	Itpr3	0	0	0	0	1	0	1	0	0	0	0	1	0	1	0	0	0	0	0	0	0	0	0	0	0	0	1	1	0
9722	Nos1ap	0	1	0	1	0	0	0	0	0	0	0	0	0	0	0	0	0	0	0	0	0	0	0	0	0	0	0	0	0
1316	Klf6	0	1	0	1	0	0	0	0	0	0	0	0	0	0	0	0	0	0	0	0	0	0	0	0	0	0	0	0	0
89795	Nav3	0	0	0	1	0	0	0	1	0	0	0	0	0	0	0	0	0	0	0	0	0	0	0	0	0	0	0	0	0
178	Agl	1	0	0	0	0	0	1	0	0	0	0	0	0	0	0	1	1	0	0	0	0	0	0	0	0	0	0	0	0
83483	Plvap	0	1	0	1	0	0	0	0	0	0	0	0	0	0	0	0	0	0	0	0	0	0	0	0	0	0	0	0	0
144100	Plekha7	0	1	0	1	0	0	0	0	0	0	0	0	0	0	0	0	0	0	0	0	0	0	0	0	0	0	0	0	0
92922	Ccdc102a	0	1	0	0	0	0	0	1	0	0	0	0	0	0	0	0	0	0	0	0	0	0	0	0	0	0	0	0	0
25791	Ngef	0	0	0	0	0	1	0	1	0	0	1	0	1	0	0	0	0	0	0	0	0	0	0	0	0	0	0	0	0
1107	Chd3	0	0	0	1	0	0	0	1	0	0	0	0	0	0	0	0	0	0	0	0	0	0	0	0	0	0	1	0	0
6228	Rps23	1	0	1	0	0	0	0	0	0	1	1	0	0	0	1	0	0	0	0	0	0	0	0	0	0	0	0	0	0
81544	Gdpd5	0	1	0	0	0	1	0	0	0	0	0	0	0	0	0	0	0	1	0	0	0	0	0	0	0	0	0	0	0
826	Capns1	0	0	0	0	1	0	1	0	1	0	0	0	0	0	0	0	0	0	0	0	0	0	0	0	0	0	0	0	0
6203	Rps9	1	0	1	0	0	0	0	0	0	1	1	0	0	0	1	0	0	0	0	0	0	0	0	0	0	0	0	0	0
84836	Abhd14b	1	0	1	0	0	0	0	0	0	0	0	0	0	0	0	0	0	0	0	0	0	0	0	0	0	0	0	0	0
4191	Mdh2	0	0	0	0	1	0	1	0	0	0	0	0	0	0	0	0	1	0	0	0	0	0	0	0	0	0	0	0	0
56171	Dnah7b	0	0	0	1	0	0	0	1	0	0	0	0	0	0	0	0	0	0	0	0	0	0	0	0	0	0	0	0	0
55062	Wipi1	0	1	0	0	0	0	0	1	0	0	0	0	0	0	1	0	0	0	0	0	0	0	0	0	0	0	0	0	0
7841	Mogs	1	0	1	0	0	0	0	0	0	0	0	0	0	0	0	0	0	0	0	0	0	0	0	0	0	0	0	0	0
4810	Nhs	0	0	0	0	0	1	0	1	0	0	0	0	1	0	0	0	0	0	0	0	0	0	0	0	0	0	0	0	0
6204	Rps10	1	0	1	0	0	0	0	0	0	1	1	0	0	0	1	0	0	0	0	0	0	0	0	0	0	0	0	0	0
55858	Tmem165	1	0	0	0	0	0	1	0	0	0	0	0	0	0	0	0	0	0	0	0	0	0	0	0	0	0	0	0	0
443	Aspa	0	1	0	1	0	0	0	0	0	0	0	0	0	0	0	0	0	0	0	0	0	0	0	0	0	0	0	0	0
64423	Inf2	1	0	1	0	0	0	0	0	0	0	0	0	0	0	0	0	0	0	0	0	0	0	0	0	0	0	0	0	0
4135	Map6	0	1	0	0	0	0	0	1	0	0	0	0	0	0	0	0	0	0	0	0	0	0	0	0	0	0	0	0	0
10424	Pgrmc2	1	0	1	0	0	0	0	0	0	0	0	0	1	0	0	0	0	0	0	0	0	0	0	0	0	0	0	0	0
408	Arrb1	0	1	0	1	0	0	0	0	0	0	0	0	0	1	0	0	0	0	0	0	1	0	0	0	0	0	1	0	0
169355	Ido2	0	1	0	1	0	0	0	0	0	0	0	0	0	0	0	0	0	0	0	0	0	0	0	0	0	0	0	0	0
8878	Sqstm1	0	0	0	0	1	0	1	0	0	0	0	0	0	0	0	0	0	0	0	1	0	0	0	0	0	0	1	0	0
7431	Vim	1	0	1	0	0	0	0	0	0	0	0	0	1	0	0	0	0	0	0	1	0	0	0	0	0	0	0	1	0
488	Atp2a2	1	0	1	0	0	0	0	0	0	0	0	0	0	1	0	0	0	0	0	0	0	0	0	0	0	0	0	1	0
6208	Rps14	1	0	1	0	0	0	0	0	0	1	1	0	0	0	1	0	0	0	0	0	0	0	0	0	0	0	0	0	0
4363	Abcc1	0	0	0	1	0	0	1	0	0	0	0	0	0	0	1	0	0	1	0	0	0	0	0	0	0	0	0	0	0
2794	Gnl1	0	0	1	0	0	0	1	0	0	0	0	0	0	0	0	0	0	0	0	0	0	0	0	0	0	0	0	0	0
6546	Slc8a1	0	0	0	0	0	1	0	1	0	0	0	0	0	1	0	0	0	0	0	0	0	0	0	0	0	0	0	1	0
55107	Ano1	0	1	0	1	0	0	0	0	0	0	0	0	0	0	0	0	0	0	0	0	0	0	0	0	0	0	0	0	0
29767	Tmod2	0	0	0	1	0	0	0	1	0	0	0	0	0	0	0	0	0	0	0	0	0	0	0	0	0	0	0	1	0
375190	Fam228b	0	1	0	0	0	0	0	1	0	0	0	0	0	0	0	0	0	0	0	0	0	0	0	0	0	0	0	0	0
27341	Rrp7a	0	0	1	0	1	0	0	0	0	1	0	0	0	0	0	0	0	0	0	0	0	0	0	0	0	0	0	0	0
8496	Ppfibp1	1	0	0	0	0	0	1	0	0	0	0	0	0	0	0	0	0	0	0	0	0	0	0	0	0	0	1	0	0
8877	Sphk1	0	1	0	0	0	0	0	1	0	0	0	1	0	0	0	0	0	1	0	0	0	0	0	0	0	0	0	0	0
308	Anxa5	0	0	0	0	1	0	1	0	0	0	0	0	0	1	0	0	0	0	0	0	0	0	0	0	0	0	0	0	0
55660	Prpf40a	1	0	1	0	0	0	0	0	0	1	0	0	0	0	0	0	0	0	0	0	0	0	0	0	0	0	0	0	0
60468	Bach2	0	1	0	1	0	0	0	0	0	0	0	0	0	0	0	0	0	0	0	0	0	0	0	0	0	0	0	0	0
2668	Gdnf	0	0	0	1	0	0	0	1	0	0	1	0	0	0	0	0	0	0	0	0	0	0	0	0	0	0	1	0	0
23047	Pds5b	1	0	1	0	0	0	0	0	0	0	0	0	0	0	0	0	0	0	0	0	0	0	0	0	0	0	0	0	0
80279	Cdk5rap3	0	0	1	0	0	0	1	0	0	0	0	0	0	0	0	0	0	0	0	0	0	0	0	0	0	0	0	0	0
6599	Smarcc1	0	0	0	0	1	0	1	0	0	0	0	0	0	0	0	0	0	0	0	0	0	0	0	0	0	0	0	0	0
7453	Wars1	0	0	0	0	1	0	1	0	0	0	0	0	0	0	0	0	0	0	0	0	0	0	0	0	0	0	0	0	0
10989	Immt	1	0	0	0	0	0	1	0	0	0	0	0	0	0	0	0	0	0	0	0	0	0	0	0	0	0	0	0	0
2245	Fgd1	0	1	0	1	0	0	0	0	0	0	0	0	1	0	0	0	0	0	0	0	0	0	0	0	0	0	0	0	0
22994	Cep131	0	1	0	1	0	0	0	0	0	0	0	0	0	0	0	0	0	0	0	0	0	0	0	0	0	0	0	0	0
3218	Hoxb8	0	1	0	1	0	0	0	0	0	0	0	0	0	0	0	0	0	0	0	0	0	0	0	0	0	0	0	0	0
947	Cd34	0	1	0	1	0	0	0	0	0	0	0	0	0	0	0	0	0	0	0	0	0	0	0	0	0	0	0	0	0
26575	Rgs17	0	1	0	1	0	0	0	0	0	0	0	0	0	0	0	0	0	0	0	0	0	0	0	0	0	0	0	0	0
521	Atp5me	1	0	1	0	0	0	0	0	0	0	0	0	0	0	0	0	0	0	0	0	0	0	0	1	0	0	0	0	0
160851	Dgkh	0	1	0	1	0	0	0	0	0	0	0	0	0	1	0	0	0	0	0	0	0	0	0	0	0	0	0	0	0
10940	Pop1	0	0	0	1	0	0	0	1	0	0	0	0	0	0	0	0	0	0	0	0	0	0	0	0	0	0	0	0	0
5106	Pck2	0	0	1	0	0	0	1	0	0	0	0	0	0	0	0	0	1	0	0	0	0	0	0	0	0	0	0	0	0
9413	Fam189a2	0	0	0	1	0	0	0	1	0	0	0	0	0	0	0	0	0	0	0	0	0	0	0	0	0	0	0	0	0
5565	Prkab2	0	1	0	1	0	0	0	0	0	0	0	0	0	0	0	0	0	1	0	0	1	0	0	0	0	0	0	0	0
64108	Rtp4	0	1	0	0	0	1	0	0	0	0	0	0	0	0	0	0	0	0	0	0	0	0	0	0	0	0	0	0	0
56704	Jph1	0	1	0	0	0	0	0	1	0	0	0	0	0	0	0	0	0	0	0	0	0	0	0	0	0	0	0	0	0
10016	Pdcd6	1	0	0	0	0	0	1	0	0	0	0	0	0	0	0	0	0	0	0	0	0	0	0	0	0	0	0	0	0
1462	Vcan	0	0	0	1	0	0	0	1	1	0	0	0	0	0	0	0	1	0	1	0	0	0	1	0	0	0	0	0	0
84418	Cystm1	0	1	0	0	0	0	0	1	0	0	0	0	0	0	0	1	0	0	0	0	0	0	0	0	0	0	0	0	0
79734	Kctd17	0	0	0	0	0	0	1	1	0	0	0	0	0	0	0	0	0	0	0	0	0	0	0	0	0	0	0	0	0
91653	Boc	0	1	0	1	0	0	0	0	0	0	0	0	0	0	0	0	0	0	0	0	0	0	0	0	0	0	0	0	0
4716	Ndufb10	1	0	1	0	0	0	0	0	0	0	0	0	0	0	0	0	0	0	0	0	0	0	0	1	0	0	0	0	0
2109	Etfb	1	0	1	0	0	0	0	0	0	0	0	0	0	0	0	0	0	0	0	0	0	0	0	1	0	0	0	0	0
51253	Mrpl37	0	1	0	0	0	0	0	1	0	0	0	0	0	0	0	0	0	0	0	0	0	0	0	0	0	0	0	0	0
2027	Eno3	0	0	0	0	0	0	1	1	0	0	0	0	0	0	0	0	1	0	0	0	0	0	0	0	0	0	0	0	0
56034	Pdgfc	0	1	0	1	0	0	0	0	0	0	0	1	0	0	0	0	0	0	0	0	0	0	0	0	0	0	0	0	0
2026	Eno2	0	1	0	1	0	0	0	0	0	0	0	0	0	0	0	0	1	0	0	0	0	0	0	0	0	0	0	0	0
4122	Man2a2	0	1	0	1	0	0	0	0	0	0	0	0	0	0	0	0	0	0	0	0	1	0	0	0	0	0	0	0	0
112495	Gtf3c6	0	1	0	1	0	0	0	0	0	0	0	0	0	0	0	0	0	0	0	0	0	0	0	0	0	0	0	0	0
2017	Cttn	0	0	1	0	1	0	0	0	0	0	0	0	1	0	0	0	0	0	0	0	1	0	0	0	0	0	0	0	0
2585	Galk2	1	0	1	0	0	0	0	0	0	0	0	0	0	0	0	0	0	0	0	0	0	0	0	0	0	0	0	0	0
4248	Mgat3	0	1	0	1	0	0	0	0	0	0	0	0	0	0	0	0	0	0	0	0	0	0	0	0	0	0	0	0	0
7042	Tgfb2	0	1	0	0	0	0	0	1	1	0	0	0	0	1	0	0	0	0	1	0	0	1	0	0	0	0	0	0	0
4038	Lrp4	0	1	0	0	0	0	0	1	1	0	0	0	0	0	0	0	0	0	1	0	0	0	0	0	0	0	0	0	0
84632	Afap1l2	0	1	0	1	0	0	0	0	0	0	0	0	0	0	0	0	0	0	0	0	0	0	0	0	0	0	0	0	0
590	Bche	0	0	0	1	0	0	0	1	0	0	0	0	0	0	0	0	0	1	0	0	0	0	0	0	0	0	0	0	0
775	Cacna1c	0	0	0	1	0	0	0	1	0	0	1	0	0	0	0	0	0	0	0	0	0	0	0	0	0	0	0	1	0
1501	Ctnnd2	0	0	0	0	0	1	0	1	0	0	0	0	0	0	0	0	0	0	0	0	0	0	0	0	0	0	0	0	0
84795	Pyroxd2	0	1	0	1	0	0	0	0	0	0	0	0	0	0	0	0	0	0	0	0	0	0	0	0	0	0	0	0	0
130589	Galm	0	1	0	0	0	1	0	0	0	0	0	0	0	0	0	0	0	0	0	0	0	0	0	0	0	0	0	0	0
83743	Grwd1	1	0	0	0	1	0	0	0	0	0	0	0	0	0	0	0	0	0	0	0	0	0	0	0	0	0	0	0	0
389658	Alkal1	0	1	0	1	0	0	0	0	0	0	0	0	0	0	0	0	0	0	0	0	0	0	0	0	0	0	0	0	0
9230	Rab11b	1	0	1	0	0	0	0	0	0	0	0	0	0	0	0	0	0	0	0	0	1	0	0	0	0	0	0	0	0
9871	Sec24d	0	1	0	1	0	0	0	0	0	0	0	0	0	0	0	0	0	1	0	0	1	0	0	0	0	1	0	0	0
59342	Scpep1	0	0	1	0	0	0	1	0	0	0	0	0	0	0	0	0	0	0	0	0	0	0	0	0	0	0	0	0	0
114786	Xkr4	0	0	0	1	0	0	0	1	0	0	0	0	0	0	0	0	0	0	0	0	0	0	0	0	0	0	0	0	0
10250	Srrm1	1	0	1	0	0	0	0	0	0	1	0	0	1	0	0	0	0	0	0	0	0	0	0	0	0	0	0	0	0
3930	Lbr	1	0	1	0	0	0	0	0	0	0	0	0	1	0	0	0	0	1	0	0	0	0	0	0	0	0	0	0	0
115207	Kctd12	0	0	0	1	0	0	0	1	0	0	0	0	0	0	0	0	0	0	0	0	0	0	0	0	0	0	0	0	0
22795	Nid2	0	1	0	0	0	0	0	1	1	0	0	0	0	0	0	0	0	0	1	0	0	0	0	0	0	0	0	0	0
54995	Oxsm	0	1	0	1	0	0	0	0	0	0	0	0	0	0	0	0	0	0	0	0	0	0	0	0	0	0	0	0	0
11072	Dusp14	0	1	0	1	0	0	0	0	0	0	0	0	0	0	0	0	0	0	0	0	0	0	0	0	0	0	0	0	0
6542	Slc7a2	0	1	0	1	0	0	0	0	0	0	0	0	0	0	0	0	0	0	0	0	0	0	0	0	0	0	0	0	0
57648	C77080	0	1	0	1	0	0	0	0	0	0	0	0	0	0	0	0	0	0	0	0	0	0	0	0	0	0	0	0	0
9601	Pdia4	0	0	0	0	0	0	1	1	0	0	0	0	0	0	0	0	0	0	0	0	0	0	0	0	0	0	0	0	0
56983	Poglut1	0	1	0	1	0	0	0	0	0	0	0	0	0	0	0	0	0	0	0	0	0	0	0	0	0	0	0	0	0
23648	Ssbp3	0	0	0	1	0	0	0	1	0	0	0	0	0	0	0	0	0	0	0	0	0	0	0	0	0	0	0	0	0
4175	Mcm6	1	0	0	0	0	0	1	0	0	0	0	0	0	0	0	0	0	0	0	0	0	0	0	0	0	0	0	0	0
10769	Plk2	0	1	0	1	0	0	0	0	0	0	0	0	0	0	0	0	0	0	0	0	0	0	0	0	0	0	0	0	0
10670	Rraga	0	0	0	0	0	0	1	1	0	0	0	0	0	0	1	0	0	0	0	0	0	0	0	0	0	0	1	0	0
57669	Epb41l5	0	1	0	1	0	0	0	0	0	0	0	0	0	0	0	0	0	0	0	0	0	0	0	0	0	0	0	0	0
5303	Pin4	1	0	1	0	0	0	0	0	0	0	0	0	0	0	0	0	0	0	0	0	0	0	0	0	0	0	0	0	0
27131	Snx5	1	0	1	0	0	0	0	0	0	0	0	0	0	0	0	0	0	0	0	0	1	0	0	0	0	0	0	0	0
56172	Ank	0	1	0	1	0	0	0	0	0	0	0	0	0	0	0	0	0	0	0	0	0	0	0	0	0	0	0	0	0
81	Actn4	0	1	0	1	0	0	0	0	0	0	0	0	0	1	0	0	0	0	0	0	0	0	0	0	0	0	0	0	0
59271	Eva1c	0	1	0	1	0	0	0	0	0	0	0	0	0	0	0	0	0	0	0	0	0	0	0	0	0	0	0	0	0
3183	Hnrnpc	1	0	1	0	0	0	0	0	0	1	0	0	1	0	0	0	0	0	0	0	0	0	0	0	0	0	0	0	0
11235	Pdcd10	0	0	0	0	1	0	1	0	0	0	0	0	0	0	0	0	0	0	0	0	0	0	0	0	0	0	0	0	0
10351	Abca8b	0	1	0	1	0	0	0	0	0	0	0	0	0	0	0	0	0	0	0	0	0	0	0	0	0	0	0	0	0
163	Ap2b1	1	0	1	0	0	0	0	0	0	0	1	1	0	0	0	0	0	0	0	0	1	0	0	0	0	0	0	0	0
6722	Srf	0	1	0	1	0	0	0	0	0	0	0	1	1	0	0	0	0	0	0	0	0	0	0	0	0	0	0	0	0
25902	Mthfd1l	1	0	1	0	0	0	0	0	0	0	0	0	0	0	0	0	0	0	0	0	0	0	0	0	0	0	0	0	0
8460	Tpst1	0	1	0	0	0	0	0	1	0	0	0	0	0	0	0	0	0	0	0	0	0	0	0	0	0	0	0	0	0
23263	Mcf2l	0	1	0	0	0	0	0	1	0	0	0	0	1	0	0	0	0	0	0	0	0	0	0	0	0	0	0	0	0
6510	Slc1a5	1	0	1	0	0	0	0	0	0	0	0	0	1	0	0	0	0	0	0	0	0	0	0	0	0	0	0	0	0
157753	Tmem74	0	1	0	0	0	0	0	1	0	0	0	0	0	0	0	0	0	0	0	0	0	0	0	0	0	0	0	0	0
3162	Hmox1	0	0	0	0	0	1	1	0	0	0	0	0	0	0	1	0	0	0	0	1	0	0	0	0	0	0	0	0	0
337876	Chsy3	0	1	0	1	0	0	0	0	0	0	0	0	0	0	0	0	1	0	0	0	0	0	0	0	0	0	0	0	0
9414	Tjp2	1	0	0	0	1	0	0	0	0	0	0	0	1	0	0	0	0	0	0	0	0	0	0	0	0	0	0	0	0
57602	Usp36	0	0	0	1	0	0	0	1	0	0	0	0	0	0	0	0	0	0	0	0	0	0	0	0	0	0	0	0	0
10203	Calcrl	0	0	0	1	0	0	0	1	0	0	0	0	0	0	0	0	0	0	0	0	0	0	0	0	0	0	0	0	0
1108	Chd4	1	0	1	0	0	0	0	0	0	0	0	1	0	0	0	0	0	0	0	0	0	0	0	0	0	0	1	0	0
51018	Rrp15	0	1	0	1	0	0	0	0	0	0	0	0	0	0	0	0	0	0	0	0	0	0	0	0	0	0	0	0	0
10452	Tomm40	1	0	1	0	0	0	0	0	0	0	0	0	0	0	0	0	0	0	0	0	0	0	0	0	0	0	0	0	0
23089	Peg10	0	0	0	1	0	1	0	0	0	0	0	0	0	0	0	0	0	0	0	0	0	0	0	0	0	0	0	0	0
254528	Meiob	0	0	0	1	0	0	0	1	0	0	0	0	0	0	0	0	0	0	0	0	0	0	0	0	0	0	0	0	0
10492	Syncrip	1	0	1	0	0	0	0	0	0	0	0	0	0	0	0	0	0	0	0	0	0	0	0	0	0	0	0	0	0
11010	Glipr1	0	1	0	0	0	0	0	1	0	0	0	0	0	0	0	1	0	1	0	0	0	0	0	0	0	0	0	0	0
84439	Hhipl1	0	1	0	0	0	0	0	1	0	0	0	0	0	0	0	0	0	0	0	0	0	0	0	0	0	0	0	0	0
4651	Myo10	0	1	0	1	0	0	0	0	0	0	1	0	0	0	0	0	0	0	0	0	0	0	0	0	0	0	0	0	0
9723	Sema3e	0	1	0	0	0	0	0	1	0	0	1	0	0	0	0	0	0	0	0	0	0	0	0	0	0	0	0	0	0
64855	Niban2	1	0	1	0	0	0	0	0	0	0	0	0	0	0	0	0	0	0	0	0	0	0	0	0	0	0	0	0	0
9790	Bms1	1	0	1	0	0	0	0	0	0	1	0	0	0	0	0	0	0	0	0	0	0	0	0	0	0	0	0	0	0
84267	2210016F16Rik	0	0	0	1	0	0	0	1	0	0	0	0	0	0	0	0	0	0	0	0	0	0	0	0	0	0	0	0	0
8870	Ier3	0	0	0	1	0	0	0	1	0	0	0	0	0	0	0	0	0	0	0	0	0	0	0	0	0	0	1	0	0
9049	Aip	1	0	1	0	0	0	0	0	0	0	0	0	0	0	0	0	0	0	0	1	0	0	0	0	0	0	0	0	0
5202	Pfdn2	0	1	0	1	0	0	0	0	0	0	0	0	0	0	0	0	0	0	0	0	0	0	0	0	0	0	0	0	0
79973	Zfp970	0	1	0	1	0	0	0	0	0	0	0	0	0	0	0	0	0	0	0	0	0	0	0	0	0	0	0	0	0
27340	Utp20	1	0	1	0	0	0	0	0	0	1	0	0	0	0	0	0	0	0	0	0	0	0	0	0	0	0	0	0	0
9146	Hgs	0	0	1	0	1	0	0	0	0	0	0	1	1	0	0	0	0	0	1	0	1	0	0	0	0	0	0	0	0
10135	Nampt	1	0	0	0	0	0	1	0	0	0	0	0	0	0	0	0	0	0	0	0	0	0	0	0	0	0	0	0	0
10602	Cdc42ep3	0	1	0	1	0	0	0	0	0	0	0	0	1	0	0	0	0	0	0	0	0	0	0	0	0	0	1	0	0
658	Bmpr1b	0	1	0	1	0	0	0	0	0	0	0	0	0	0	0	0	0	0	0	0	0	0	0	0	0	0	0	0	0
2018	Emx2	0	1	0	0	0	0	0	1	0	0	0	0	0	0	0	0	0	0	0	0	0	0	0	0	0	0	0	0	0
57407	Nmral1	0	0	0	0	1	0	1	0	0	0	0	0	0	0	0	0	0	0	0	0	0	0	0	0	0	0	0	0	0
27250	Pdcd4	0	0	1	0	0	0	1	0	0	0	0	0	0	0	0	0	0	0	0	1	0	0	0	0	0	0	0	0	0
123103	Klhl33	0	1	0	0	0	0	0	1	0	0	0	0	0	0	0	0	0	0	0	0	0	0	0	0	0	0	0	0	0
51495	Hacd3	1	0	1	0	0	0	0	0	0	0	0	0	0	0	0	0	0	1	0	0	0	0	0	0	0	0	0	0	0
821	Canx	1	0	1	0	0	0	0	0	0	1	0	0	0	0	0	0	0	0	0	1	0	0	0	0	0	0	0	0	0
161753	Odf3l1	0	1	0	1	0	0	0	0	0	0	0	0	0	0	0	0	0	0	0	0	0	0	0	0	0	0	0	0	0
10642	Igf2bp1	0	0	0	1	0	0	0	1	0	0	0	0	0	0	0	0	0	0	0	0	0	0	0	0	0	0	1	0	0
4811	Nid1	0	1	0	0	0	0	0	1	1	0	0	0	0	0	0	0	0	0	1	0	0	0	0	0	0	0	0	0	0
25817	Tafa5	0	1	0	0	0	0	0	1	0	0	0	0	0	0	0	0	0	0	0	0	0	0	0	0	0	0	0	0	0
3611	Ilk	0	1	0	1	0	0	0	0	0	0	0	0	0	0	0	0	0	0	0	0	0	0	0	0	0	0	0	0	0
5600	Mapk11	0	0	0	1	0	0	0	1	0	0	1	1	1	0	1	0	0	0	0	1	0	0	0	0	0	0	0	0	0
219654	Zcchc24	0	1	0	1	0	0	0	0	0	0	0	0	0	0	0	0	0	0	0	0	0	0	0	0	0	0	0	0	0
8826	Iqgap1	0	0	0	0	1	0	1	0	0	0	0	0	1	0	0	1	0	0	0	0	0	0	0	0	0	0	1	0	0
10476	Atp5pd	1	0	1	0	0	0	0	0	0	0	0	0	0	0	0	0	0	0	0	0	0	0	0	1	0	0	0	0	0
7274	Ttpa	0	1	0	1	0	0	0	0	0	0	0	0	0	0	0	0	0	0	0	0	0	0	0	0	0	0	0	0	0
3783	Kcnn4	0	1	0	1	0	0	0	0	0	0	0	0	0	0	0	0	0	0	0	0	0	0	0	0	0	0	0	0	0
7128	Tnfaip3	0	1	0	1	0	0	0	0	0	0	0	0	0	0	0	0	0	0	0	0	0	0	0	0	0	0	0	0	0
127943	Fcrlb	0	1	0	0	0	0	0	1	0	0	0	0	0	0	0	0	0	0	0	0	0	0	0	0	0	0	0	0	0
57222	Ergic1	1	0	1	0	0	0	0	0	0	0	0	0	0	0	0	0	0	0	0	0	0	0	0	0	0	0	0	0	0
1314	Copa	1	1	0	0	0	0	0	0	0	0	0	0	0	0	0	0	0	0	0	0	1	0	0	0	0	0	0	0	0
64405	Cdh22	0	1	0	1	0	0	0	0	0	0	0	0	0	0	0	0	0	0	0	0	0	0	0	0	0	0	0	0	0
5447	Por	1	0	1	0	0	0	0	0	0	0	0	0	0	0	0	0	0	0	0	0	0	0	0	0	0	0	0	0	0
33	Acadl	1	0	1	0	0	0	0	0	0	0	0	0	0	0	0	0	0	1	0	0	0	0	0	0	0	0	0	0	0
5824	Pex19	0	1	0	1	0	0	0	0	0	0	0	0	0	0	0	0	0	0	0	0	0	0	0	0	0	0	0	0	0
4854	Notch3	0	1	0	1	0	0	0	0	0	0	0	0	0	0	0	0	0	0	0	0	0	0	0	0	0	0	0	0	0
8560	Degs1	0	1	0	1	0	0	0	0	0	0	0	0	0	0	0	1	0	1	0	0	0	0	0	0	0	0	0	0	0
253827	Msrb3	0	1	0	1	0	0	0	0	0	0	0	0	0	0	0	0	0	0	0	0	0	0	0	0	0	0	0	0	0
54103	Gsap	0	1	0	1	0	0	0	0	0	0	0	0	0	0	0	0	0	0	0	0	0	0	0	0	0	0	0	0	0
93166	Prdm6	0	1	0	1	0	0	0	0	0	0	0	0	0	0	0	0	0	0	0	0	0	0	0	0	0	0	0	0	0
285282	Rabl3	0	1	0	1	0	0	0	0	0	0	0	0	0	0	0	0	0	0	0	0	0	0	0	0	0	0	0	0	0
718	C3	0	1	0	0	0	0	0	1	0	0	0	0	0	0	0	1	0	0	0	0	0	0	1	0	0	0	0	0	0
994	Cdc25b	0	1	0	1	0	0	0	0	0	0	0	0	0	0	0	0	0	0	0	0	0	0	0	0	0	0	0	0	0
1650	Ddost	1	0	1	0	0	0	0	0	0	1	0	0	0	0	0	1	0	0	0	0	0	0	0	0	0	0	0	0	0
132430	Pabpc4l	0	0	0	1	0	0	0	1	0	0	0	0	0	0	0	0	0	0	0	0	0	0	0	0	0	0	0	0	0
6788	Stk3	1	0	1	0	0	0	0	0	0	0	0	0	0	0	0	0	0	0	0	0	0	0	0	0	0	0	0	0	0
2947	Gstm5	1	0	0	0	0	0	1	0	0	0	0	0	0	0	0	0	0	0	0	0	0	0	0	0	0	0	0	0	0
22907	Dhx30	1	0	1	0	0	0	0	0	0	0	0	0	0	0	0	0	0	0	0	0	0	0	0	0	0	0	0	0	0
55686	Mreg	0	0	0	1	0	0	0	1	0	0	0	0	0	0	0	0	0	0	0	0	0	0	0	0	0	0	0	0	0
6662	Sox9	0	1	0	1	0	0	0	0	0	0	0	0	0	0	0	0	0	0	0	0	0	0	0	0	0	0	0	0	0
10935	Prdx3	0	0	0	0	1	0	1	0	0	0	0	0	0	0	1	0	0	0	0	0	0	0	0	0	0	0	0	0	0
51520	Lars1	1	0	1	0	0	0	0	0	0	1	0	0	0	0	0	0	0	0	0	0	0	0	0	0	0	0	0	0	0
5868	Rab5a	1	0	1	0	0	0	0	0	0	0	0	0	0	1	0	0	0	1	0	0	1	0	0	0	0	0	0	0	0
2952	Gstt1	0	1	0	1	0	0	0	0	0	0	0	0	0	0	0	0	0	0	0	0	0	0	0	0	0	0	0	0	0
89790	Siglecg	0	1	0	1	0	0	0	0	0	0	0	0	0	0	0	0	0	0	0	0	0	0	0	0	0	0	0	0	0
51011	Fahd2a	0	1	0	1	0	0	0	0	0	0	0	0	0	0	0	0	0	0	0	0	0	0	0	0	0	0	0	0	0
10247	Rida	1	0	0	0	1	0	0	0	0	1	0	0	0	0	0	0	0	0	0	0	0	0	0	0	0	0	0	0	0
80714	Pbx4	0	1	0	1	0	0	0	0	0	0	0	0	0	0	0	0	0	0	0	0	0	0	0	0	0	0	0	0	0
114134	Slc2a13	0	1	0	1	0	0	0	0	0	0	0	0	0	0	0	0	0	0	0	0	0	0	0	0	0	0	0	0	0
9531	Bag3	0	1	1	0	0	0	0	0	0	0	0	0	0	0	1	0	0	0	0	0	0	0	0	0	0	0	0	0	0
619279	Zfp704	0	1	0	0	0	0	0	1	0	0	0	0	0	0	0	0	0	0	0	0	0	0	0	0	0	0	0	0	0
142	Parp1	1	0	1	0	0	0	0	0	0	1	0	0	0	0	0	0	0	0	0	0	0	0	0	0	0	0	0	0	0
340061	Sting1	0	1	0	0	0	0	0	1	0	0	0	0	0	0	0	1	0	0	0	0	0	0	0	0	0	0	0	0	0
6595	Smarca2	0	1	0	0	0	0	0	1	0	0	0	0	0	0	0	0	0	0	0	0	0	0	0	0	0	0	0	0	0
6741	Ssb	1	0	1	0	0	0	0	0	0	0	0	0	0	0	0	0	0	0	0	0	0	0	0	0	0	0	0	0	0
79822	Arhgap28	0	1	0	1	0	0	0	0	0	0	0	0	0	0	0	0	0	0	0	0	0	0	0	0	0	0	0	0	0
4833	Nme4	0	1	0	1	0	0	0	0	0	0	0	0	0	0	0	0	0	0	0	0	0	0	0	0	0	0	0	0	0
23179	Rgl1	0	0	0	1	0	0	0	1	0	0	0	0	0	0	0	0	0	1	0	0	0	0	0	0	0	0	1	0	0
6238	Rrbp1	0	1	1	0	0	0	0	0	0	0	0	0	0	0	0	0	0	0	0	0	0	0	0	0	0	0	1	0	0
3065	Hdac1	1	0	1	0	0	0	0	0	0	0	0	1	0	1	0	0	0	0	0	0	0	0	0	0	0	0	1	0	0
28231	Slco4a1	0	1	0	0	0	0	0	1	0	0	0	0	0	0	0	0	0	0	0	0	0	0	0	0	0	0	0	0	0
6207	Rps13	1	0	1	0	0	0	0	0	0	1	1	0	0	0	1	0	0	0	0	0	0	0	0	0	0	0	0	0	0
7866	Ifrd2	1	0	1	0	0	0	0	0	0	0	0	0	0	0	0	0	0	0	0	0	0	0	0	0	0	0	0	0	0
200159	1700016C15Rik	0	1	0	0	0	0	0	1	0	0	0	0	0	0	0	0	0	0	0	0	0	0	0	0	0	0	0	0	0
100131755	Armcx4	0	1	0	1	0	0	0	0	0	0	0	0	0	0	0	0	0	0	0	0	0	0	0	0	0	0	0	0	0
2200	Fbn1	0	1	0	0	0	0	0	1	1	0	0	0	0	0	0	0	0	0	1	0	0	1	1	0	0	0	0	0	0
998	Cdc42	1	0	1	0	0	0	0	0	0	1	1	1	1	1	0	0	0	0	0	1	0	0	0	0	0	0	1	0	0
26011	Tenm4	0	0	0	1	0	0	0	1	0	0	0	0	0	0	0	0	0	0	0	0	0	0	0	0	0	0	0	0	0
59352	Lgr6	0	1	0	0	0	0	0	1	0	0	0	0	0	0	0	0	0	0	0	0	0	0	0	0	0	0	0	0	0
5481	Ppid	1	0	1	0	0	0	0	0	0	0	0	0	0	0	0	0	0	0	0	0	0	0	0	0	0	0	0	0	0
5156	Pdgfra	0	0	0	1	0	0	0	1	0	0	0	1	0	0	0	0	0	0	0	0	0	0	0	0	0	0	1	0	0
5861	Rab1a	1	0	1	0	0	0	0	0	0	0	0	0	0	0	0	0	0	0	0	0	1	0	0	0	0	0	0	0	0
63876	Pknox2	0	1	0	0	0	0	0	1	0	0	0	0	0	0	0	0	0	0	0	0	0	0	0	0	0	0	0	0	0
10912	Gadd45g	0	1	0	1	0	0	0	0	0	0	0	0	0	0	0	0	0	0	0	0	0	0	0	0	0	0	0	0	0
3422	Idi1	0	0	0	1	0	0	1	0	0	0	0	0	0	0	0	0	0	1	0	0	0	0	0	0	0	1	0	0	0
219578	Zfp804b	0	1	0	0	0	0	0	1	0	0	0	0	0	0	0	0	0	0	0	0	0	0	0	0	0	0	0	0	0
10421	Cd2bp2	0	0	0	0	1	0	1	0	0	0	0	0	0	0	0	0	0	0	0	0	0	0	0	0	0	0	0	0	0
29927	Sec61a1	1	0	1	0	0	0	0	0	0	1	0	0	0	0	0	0	0	0	0	0	0	0	0	0	0	0	0	0	0
5176	Serpinf1	0	1	0	0	1	0	0	0	0	0	0	0	0	0	0	0	0	0	0	0	0	0	0	0	0	0	0	0	0
1521	Ctsw	0	0	0	1	0	0	0	1	0	0	0	0	0	1	0	0	0	0	0	0	0	0	0	0	0	0	0	0	0
1736	Dkc1	1	0	1	0	0	0	0	0	0	1	0	0	0	0	0	0	0	0	0	0	0	0	0	0	0	0	0	0	0
64131	Xylt1	0	1	0	0	0	1	0	0	0	0	0	0	0	0	0	0	1	0	0	0	0	0	0	0	0	0	0	0	0
4318	Mmp9	0	0	0	1	0	0	0	1	1	0	1	1	0	0	0	1	0	0	0	1	0	0	0	0	0	0	0	0	0
22905	Epn2	0	1	0	1	0	0	0	0	0	0	0	0	0	0	0	0	0	0	0	0	1	0	0	0	0	0	0	0	0
9590	Akap12	0	1	0	1	0	0	0	0	0	0	0	0	1	0	0	0	0	0	0	0	0	0	0	0	0	0	0	0	0
55561	Cdc42bpg	0	1	0	0	0	0	0	1	0	0	0	0	0	0	0	0	0	0	0	0	0	0	0	0	0	0	0	0	0
55666	Nploc4	0	0	1	0	1	0	0	0	0	0	0	0	0	0	0	0	0	0	0	0	0	0	0	0	0	0	0	0	0
79886	Caap1	0	1	0	1	0	0	0	0	0	0	0	0	0	0	0	0	0	0	0	0	0	0	0	0	0	0	0	0	0
10220	Gdf11	0	1	0	0	0	0	0	1	0	0	0	0	0	0	0	0	0	0	0	0	0	0	0	0	0	0	0	0	0
140885	Sirpa	0	0	0	1	0	0	0	1	0	0	0	0	0	1	0	1	0	0	0	0	0	0	0	0	0	0	0	0	0
5834	Pygb	1	0	1	0	0	0	0	0	0	0	0	0	0	0	0	1	1	0	0	0	0	0	0	0	0	0	0	0	0
85441	Helz2	0	1	0	1	0	0	0	0	0	0	0	0	0	0	1	0	0	1	0	0	0	0	0	0	0	1	0	0	0
10765	Kdm5b	0	1	0	0	0	0	0	1	0	0	0	0	0	0	0	0	0	0	0	0	0	0	0	0	0	0	0	0	0
57561	Arrdc3	0	1	0	1	0	0	0	0	0	0	0	0	0	0	0	0	0	0	0	0	0	0	0	0	0	0	0	0	0
26353	Hspb8	0	0	1	0	0	0	1	0	0	0	0	0	0	0	1	0	0	0	0	0	0	0	0	0	0	0	0	0	0
29995	Lmcd1	0	1	0	1	0	0	0	0	0	0	0	0	0	0	0	0	0	0	0	0	0	0	0	0	0	0	0	0	0
5971	Relb	0	1	0	1	0	0	0	0	0	0	0	0	0	0	0	0	0	0	0	1	0	0	0	0	0	0	0	0	0
158405	E130308A19Rik	0	0	0	1	0	0	0	1	0	0	0	0	0	0	0	0	0	0	0	0	0	0	0	0	0	0	0	0	0
9525	Vps4b	1	0	1	0	0	0	0	0	0	0	0	0	0	0	0	0	0	0	0	0	1	0	0	0	0	0	0	0	0
23171	Gpd1l	0	0	0	0	0	0	1	1	0	0	0	0	0	0	0	0	0	1	0	0	0	0	0	0	0	0	0	0	0
2934	Gsn	1	0	1	0	0	0	0	0	0	0	0	0	0	0	0	1	0	0	0	0	0	0	0	0	0	0	0	0	0
23242	Cobl	0	0	0	1	0	0	0	1	0	0	0	0	0	0	0	0	0	0	0	0	0	0	0	0	0	0	0	0	0
10252	Spry1	0	1	0	1	0	0	0	0	0	0	0	1	0	0	0	0	0	0	0	0	0	0	0	0	0	0	0	0	0
58472	Sqor	1	0	1	0	0	0	0	0	0	1	0	0	0	0	0	0	0	0	0	0	0	0	0	0	0	0	0	0	0
9588	Prdx6	1	0	1	0	0	0	0	0	0	0	0	0	0	0	1	1	0	0	0	0	0	0	0	0	0	0	0	0	0
2977	Gucy1a2	0	0	0	1	0	0	0	1	0	0	0	0	0	1	0	0	0	0	0	0	0	0	0	0	0	0	0	1	0
4616	Gadd45b	0	1	0	1	0	0	0	0	0	0	0	0	0	0	0	0	0	0	0	0	0	0	0	0	0	0	0	0	0
10762	Nup50	0	0	0	0	1	0	1	0	0	0	0	0	0	0	1	0	1	0	0	1	0	0	0	0	0	0	0	0	0
1515	Ctsl	0	0	1	0	0	0	1	0	1	0	0	0	0	0	0	0	0	0	0	0	0	0	0	0	0	0	0	0	0
1687	Gsdme	0	1	0	0	0	0	0	1	0	0	0	0	0	0	0	0	0	0	0	0	0	0	0	0	0	0	0	0	0
827	Capn6	0	1	0	0	0	0	0	1	1	0	0	0	0	0	0	0	0	0	0	0	0	0	0	0	0	0	0	0	0
84293	Prxl2a	0	1	0	1	0	0	0	0	0	0	0	0	0	0	0	0	0	0	0	0	0	0	0	0	0	0	0	0	0
121227	Lrig3	0	1	0	1	0	0	0	0	0	0	0	0	0	0	0	0	0	0	0	0	0	0	0	0	0	0	0	0	0
1786	Dnmt1	1	0	1	0	0	0	0	0	0	0	0	0	0	0	0	0	0	0	0	0	0	0	0	0	0	0	0	0	0
81606	Lbh	0	1	0	1	0	0	0	0	0	0	0	0	0	0	0	0	0	0	0	0	0	0	0	0	0	0	0	0	0
4062	Ly6a;Ly6c1	0	1	0	1	0	0	0	0	0	0	0	0	0	0	0	0	0	0	0	0	0	0	0	0	0	0	0	0	0
152002	Xxylt1	1	0	1	0	0	0	0	0	0	0	0	0	0	0	0	0	0	0	0	0	0	0	0	0	0	0	0	0	0
6096	Rorb	0	1	0	0	0	0	0	1	0	0	0	0	0	0	0	0	0	0	0	0	0	0	0	0	0	0	0	0	0
84833	Atp5mk	1	0	1	0	0	0	0	0	0	0	0	0	0	0	0	0	0	0	0	0	0	0	0	0	0	0	0	0	0
84946	Ltv1	0	1	0	1	0	0	0	0	0	0	0	0	0	0	0	0	0	0	0	0	0	0	0	0	0	0	0	0	0
55759	Wdr12	0	0	0	0	1	0	1	0	0	0	0	0	0	0	0	0	0	0	0	0	0	0	0	0	0	0	0	0	0
6189	Rps3a	1	0	1	0	0	0	0	0	0	1	1	0	0	0	1	0	0	0	0	0	0	0	0	0	0	0	0	0	0
6168	Rpl37a	1	0	1	0	0	0	0	0	0	1	1	0	0	0	1	0	0	0	0	0	0	0	0	0	0	0	0	0	0
4783	Nfil3	0	1	0	1	0	0	0	0	0	0	0	0	0	0	0	0	0	0	0	0	0	0	0	0	0	0	0	0	0
11231	Sec63	1	0	1	0	0	0	0	0	0	0	0	0	0	0	0	0	0	0	0	0	0	0	0	0	0	0	0	0	0
5325	Plagl1	0	1	0	1	0	0	0	0	0	0	0	0	0	0	0	0	0	0	0	0	0	0	0	0	0	0	0	0	0
6133	Rpl9	1	0	1	0	0	0	0	0	0	1	1	0	0	0	1	0	0	0	0	0	0	0	0	0	0	0	0	0	0
3955	Lfng	0	0	0	0	0	1	0	1	0	0	0	0	0	0	0	0	0	0	0	0	0	0	0	0	0	0	0	0	0
3899	Aff3	0	1	0	1	0	0	0	0	0	0	0	0	0	0	0	0	0	0	0	0	0	0	0	0	0	0	0	0	0
85027	Smim3	0	1	0	1	0	0	0	0	0	0	0	0	0	0	0	0	0	0	0	0	0	0	0	0	0	0	0	0	0
55379	Lrrc59	1	0	1	0	0	0	0	0	0	0	0	0	0	0	0	0	0	0	0	0	0	0	0	0	0	0	0	0	0
25979	Dhrs7b	1	0	1	0	0	0	0	0	0	0	0	0	0	0	0	0	0	1	0	0	0	0	0	0	0	0	0	0	0
29085	Phpt1	0	0	1	0	0	0	1	0	0	0	0	0	0	0	0	0	0	0	0	0	0	0	0	0	0	0	0	0	0
1756	Dmd	0	0	0	1	0	0	0	1	1	0	0	0	0	0	0	0	0	0	1	0	0	0	0	0	0	0	0	1	0
9997	Sco2	1	0	1	0	0	0	0	0	0	0	0	0	0	0	1	0	0	0	0	0	0	0	0	1	0	0	0	0	0
9173	Il1rl1	0	1	0	0	0	0	0	1	0	0	0	0	0	0	0	0	0	0	0	1	0	0	0	0	0	0	1	0	0
624	Bdkrb2	0	0	0	1	0	1	0	0	0	0	0	0	0	0	0	0	0	0	0	0	0	0	0	0	0	0	0	0	0
122416	Ankrd9	0	1	0	1	0	0	0	0	0	0	0	0	0	0	0	0	0	0	0	0	0	0	0	0	0	0	0	0	0
7088	Tle1	0	0	0	1	0	0	0	1	0	0	0	0	0	0	0	0	0	0	0	0	0	0	0	0	0	0	0	0	0
115290	Fbxo17	0	1	0	0	0	0	0	1	0	0	0	0	0	0	0	0	0	0	0	0	0	0	0	0	0	0	0	0	0
56931	Dus3l	1	0	1	0	0	0	0	0	0	0	0	0	0	0	0	0	0	0	0	0	0	0	0	0	0	0	0	0	0
255057	Cbarp	0	1	0	1	0	0	0	0	0	0	0	0	0	0	0	0	0	0	0	0	0	0	0	0	0	0	0	0	0
3998	Lman1	0	0	1	0	1	0	0	0	0	0	0	0	1	0	0	0	0	0	0	0	1	0	0	0	0	0	0	0	0
1327	Cox4i1	1	0	1	0	0	0	0	0	0	0	0	0	0	0	1	0	0	0	0	0	0	0	0	1	0	0	0	0	0
9904	Rbm19	0	0	1	0	0	0	1	0	0	0	0	0	0	0	0	0	0	0	0	0	0	0	0	0	0	0	0	0	0
7133	Tnfrsf1b	0	1	0	1	0	0	0	0	0	0	0	0	0	0	0	1	0	0	0	1	0	0	0	0	0	0	0	0	0
23318	Tut4	0	0	0	1	0	0	0	1	0	0	0	0	0	0	0	0	0	0	0	0	0	0	0	0	0	0	0	0	0
55755	Cdk5rap2	0	1	0	0	0	0	0	1	0	0	0	0	0	0	0	0	0	0	0	0	0	0	0	0	0	0	0	0	0
55501	Chst12	0	1	0	0	0	0	0	1	0	0	0	0	0	0	0	0	1	0	0	0	0	0	0	0	0	0	0	0	0
58493	Inip	0	1	0	0	0	0	0	1	0	0	0	0	0	0	0	0	0	0	0	0	0	0	0	0	0	0	0	0	0
2888	Grb14	0	1	0	1	0	0	0	0	0	0	0	0	0	1	0	0	0	0	0	0	0	0	0	0	0	0	0	0	0
84549	Mak16	0	0	0	0	1	0	1	0	0	0	0	0	0	0	0	0	0	0	0	0	0	0	0	0	0	0	0	0	0
4774	Nfia	0	1	0	1	0	0	0	0	0	0	0	0	0	0	0	0	0	0	0	0	0	0	0	0	0	0	0	0	0
160428	Aldh1l2	1	0	1	0	0	0	0	0	0	0	0	0	0	0	0	0	0	0	0	0	0	0	0	0	0	0	0	0	0
3838	Kpna2	1	0	0	0	0	0	1	0	0	1	0	0	0	0	0	0	0	0	0	1	0	0	0	0	0	0	1	0	0
23081	Kdm4c	0	0	0	1	0	0	0	1	0	0	0	0	1	0	0	0	0	0	0	0	0	0	0	0	0	0	0	0	0
6628	Snrpb	1	0	1	0	0	0	0	0	0	1	0	0	0	0	0	0	0	0	0	0	0	0	0	0	0	0	0	0	0
23165	Nup205	0	0	0	0	1	0	1	0	0	0	0	0	0	0	1	0	1	0	0	1	0	0	0	0	0	0	0	0	0
310	Anxa7	1	0	1	0	0	0	0	0	0	0	0	0	0	0	0	0	0	0	0	0	0	0	0	0	0	0	0	0	0
79780	Ccdc82	0	1	0	1	0	0	0	0	0	0	0	0	0	0	0	0	0	0	0	0	0	0	0	0	0	0	0	0	0
6675	Uap1	0	1	0	1	0	0	0	0	0	0	0	0	0	0	0	0	0	0	0	0	0	0	0	0	0	0	0	0	0
402	Arl2	1	0	0	0	1	0	0	0	0	0	0	0	0	0	0	0	0	0	0	0	0	0	0	0	0	0	1	0	0
79924	Adm2	0	1	0	1	0	0	0	0	0	0	0	0	0	0	0	0	0	0	0	0	0	0	0	0	0	0	0	0	0
10380	Bpnt1	0	1	0	1	0	0	0	0	0	0	0	0	0	0	0	0	0	0	0	0	0	0	0	0	0	0	0	0	0
26577	Pcolce2	0	0	0	1	0	0	0	1	1	0	0	0	0	0	0	0	0	0	0	0	0	0	0	0	0	0	0	0	0
79836	Lonrf3	0	1	0	1	0	0	0	0	0	0	0	0	0	0	0	0	0	0	0	0	0	0	0	0	0	0	0	0	0
9120	Slc16a6	0	1	0	1	0	0	0	0	0	0	0	0	0	0	0	0	0	0	0	0	0	0	0	0	0	0	0	0	0
4311	Mme	0	1	0	0	0	0	0	1	0	0	0	0	0	0	0	1	0	0	0	0	0	0	0	0	0	0	0	0	0
55161	Tmem33	1	0	1	0	0	0	0	0	0	0	0	0	0	0	0	0	0	0	0	0	0	0	0	0	0	0	0	0	0
392617	Elfn1	0	1	0	1	0	0	0	0	0	0	0	0	0	0	0	0	0	0	0	0	0	0	0	0	0	0	0	0	0
3945	Ldhb	0	1	0	1	0	0	0	0	0	0	0	0	0	0	0	0	0	0	0	0	0	0	0	0	0	0	0	0	0
51430	Suco	0	1	0	1	0	0	0	0	0	0	0	0	0	0	0	0	0	0	0	0	0	0	0	0	0	0	0	0	0
57595	Pdzd4	0	0	0	1	0	0	0	1	0	0	0	0	0	0	0	0	0	0	0	0	0	0	0	0	0	0	0	0	0
84879	Mfsd2a	0	0	0	1	0	1	0	0	0	0	0	0	0	0	0	0	0	1	0	0	0	0	0	0	0	0	0	0	0
6949	Tcof1	0	0	0	0	1	0	1	0	0	0	0	0	0	0	0	0	0	0	0	0	0	0	0	0	0	0	0	0	0
80017	Dglucy	1	0	1	0	0	0	0	0	0	0	0	0	0	0	0	0	0	0	0	0	0	0	0	0	0	0	0	0	0
80139	Zfp703	0	1	0	0	0	0	0	1	0	0	0	0	0	0	0	0	0	0	0	0	0	0	0	0	0	0	0	0	0
9388	Lipg	0	1	0	0	0	0	0	1	0	0	0	0	0	0	0	0	0	0	0	0	0	0	0	0	0	0	0	0	0
10371	Sema3a	0	0	0	1	0	1	0	0	0	0	1	0	0	0	0	0	0	0	0	0	0	0	0	0	0	0	0	0	0
286	Ank1	0	0	0	1	0	0	0	1	0	0	1	0	0	0	0	0	0	0	0	0	1	0	0	0	0	0	0	0	0
55898	Unc45a	0	1	0	1	0	0	0	0	0	0	0	0	0	0	0	0	0	0	0	0	0	0	0	0	0	0	0	0	0
84626	Krba1	0	0	0	1	0	0	0	1	0	0	0	0	0	0	0	0	0	0	0	0	0	0	0	0	0	0	0	0	0
285180	Rufy4	0	1	0	1	0	0	0	0	0	0	0	0	0	0	0	0	0	0	0	0	0	0	0	0	0	0	0	0	0
55190	Nudt11	0	1	0	1	0	0	0	0	0	0	0	0	0	0	0	0	0	0	0	0	0	0	0	0	0	0	0	0	0
1302	Col11a2	0	1	0	0	0	0	0	1	1	0	0	1	0	0	0	0	0	0	1	0	0	0	0	0	0	0	0	0	0
51362	Cdc40	0	0	0	0	1	0	1	0	0	0	0	0	0	0	0	0	0	0	0	0	0	0	0	0	0	0	0	0	0
5036	Pa2g4	1	0	1	0	0	0	0	0	0	0	0	0	0	0	0	1	0	0	0	0	0	0	0	0	0	0	0	0	0
91050	Ccdc149	0	1	0	0	0	0	0	1	0	0	0	0	0	0	0	0	0	0	0	0	0	0	0	0	0	0	0	0	0
55765	Inava	0	1	0	0	0	0	0	1	0	0	0	0	0	0	0	0	0	0	0	0	0	0	0	0	0	0	0	0	0
120	Add3	0	0	0	1	0	0	0	1	0	0	0	0	1	0	0	0	0	0	0	0	0	0	0	0	0	0	0	0	0
148979	Glis1	0	0	0	1	0	0	0	1	0	0	0	0	0	0	0	0	0	0	0	0	0	0	0	0	0	0	0	0	0
168667	Bmper	0	1	0	0	0	0	0	1	0	0	0	0	0	0	0	0	0	0	0	0	0	0	0	0	0	0	0	0	0
8879	Sgpl1	1	0	1	0	0	0	0	0	0	0	0	0	0	0	0	0	0	1	0	0	0	0	0	0	0	0	0	0	0
8507	Enc1	0	1	0	1	0	0	0	0	0	0	0	0	0	0	0	0	0	0	0	0	0	0	0	0	0	0	0	0	0
151887	Ccdc80	0	1	0	0	0	0	0	1	0	0	0	0	0	0	0	0	0	0	0	0	0	0	0	0	0	0	0	0	0
214	Alcam	0	1	0	1	0	0	0	0	0	0	1	0	0	0	0	0	0	0	0	0	0	0	0	0	0	0	0	0	0
8869	St3gal5	0	1	0	1	0	0	0	0	0	0	0	0	0	0	0	0	0	0	0	0	0	0	0	0	0	0	0	0	0
65986	Zbtb10	0	1	0	1	0	0	0	0	0	0	0	0	0	0	0	0	0	0	0	0	0	0	0	0	0	0	0	0	0
1155	Tbcb	1	0	0	0	0	0	1	0	0	0	0	0	0	0	0	0	0	0	0	0	0	0	0	0	0	0	0	0	0
7360	Ugp2	1	0	1	0	0	0	0	0	0	0	0	0	0	0	0	0	1	0	0	0	0	0	0	0	0	0	0	0	0
56993	Tomm22	0	0	0	0	1	0	0	1	0	0	0	0	0	0	0	0	0	0	0	0	0	0	0	0	0	0	0	0	0
4043	Lrpap1	0	1	0	1	0	0	0	0	0	0	0	0	0	0	0	0	0	0	0	0	0	0	0	0	0	0	0	0	0
54881	Tex10	1	0	1	0	0	0	0	0	0	1	0	0	0	0	0	0	0	0	0	0	0	0	0	0	0	0	0	0	0
80176	Spsb1	0	1	0	0	0	0	0	1	0	0	0	0	0	0	0	0	0	0	0	0	0	0	0	0	0	0	0	0	0
830	Capza2	1	0	1	0	0	0	0	0	0	0	0	0	0	1	1	0	0	0	0	0	1	0	0	0	0	0	0	0	0
64409	Galnt17	0	1	0	1	0	0	0	0	0	0	0	0	0	0	0	0	0	0	0	0	0	0	0	0	0	0	0	0	0
23533	Pik3r5	0	1	0	0	0	0	0	1	0	0	0	0	0	1	0	0	0	1	0	0	0	0	0	0	0	0	0	0	0
7158	Trp53bp1	0	0	1	0	1	0	0	0	0	0	0	0	0	0	0	0	0	0	0	0	0	0	0	0	0	0	0	0	0
5928	Rbbp4	1	0	1	0	0	0	0	0	0	0	0	0	0	0	1	0	0	0	0	0	0	0	0	0	0	0	1	0	0
3696	Itgb8	0	0	0	1	0	0	0	1	1	0	0	0	0	0	0	0	0	0	1	0	0	1	0	0	0	0	0	0	0
1266	Cnn3	0	1	0	0	0	0	1	0	0	0	0	0	0	0	0	0	0	0	0	0	0	0	0	0	0	0	0	0	0
7414	Vcl	0	1	0	1	0	0	0	0	0	0	0	0	0	1	0	1	0	0	0	0	0	0	0	0	0	0	1	1	0
84896	Atad1	1	0	1	0	0	0	0	0	0	0	0	0	0	0	0	0	0	0	0	0	0	0	0	0	0	0	0	0	0
57510	Xpo5	1	0	1	0	0	0	0	0	0	0	0	0	0	0	0	0	0	0	0	0	0	0	0	0	0	0	0	0	0
26153	Kif26a	0	1	0	1	0	0	0	0	0	0	0	0	0	1	0	0	0	0	0	0	1	0	0	0	0	0	0	0	0
2070	Eya4	0	1	0	1	0	0	0	0	0	0	0	0	0	0	0	0	0	0	0	0	0	0	0	0	0	0	0	0	0
6792	Cdkl5	0	1	0	1	0	0	0	0	0	0	0	0	0	0	0	0	0	0	0	0	0	0	0	0	0	0	0	0	0
104	Adarb1	0	1	0	0	0	0	0	1	0	0	0	0	0	0	0	0	0	0	0	0	0	0	0	0	0	0	0	0	0
6147	Rpl23a	1	0	1	0	0	0	0	0	0	1	1	0	0	0	1	0	0	0	0	0	0	0	0	0	0	0	0	0	0
9023	Ch25h	0	1	0	1	0	0	0	0	0	0	0	0	0	0	0	0	0	1	0	0	0	0	0	0	0	1	0	0	0
57580	Prex1	0	1	0	0	0	0	0	1	0	0	0	0	1	0	0	0	0	0	0	0	0	0	0	0	0	0	0	0	0
93643	Tjap1	0	0	1	0	0	0	1	0	0	0	0	0	0	0	0	0	0	0	0	0	0	0	0	0	0	0	0	0	0
23371	Tns2	0	0	0	1	1	0	0	0	0	0	0	0	0	0	0	0	0	0	0	0	0	0	0	0	0	0	0	0	0
84298	Llph	0	1	0	1	0	0	0	0	0	0	0	0	0	0	0	0	0	0	0	0	0	0	0	0	0	0	0	0	0
9843	Heph	0	1	0	1	0	0	0	0	0	0	0	0	0	0	0	0	0	0	0	0	0	0	0	0	0	0	0	0	0
29967	Lrp12	0	1	0	0	0	0	0	1	0	0	0	0	0	0	0	0	0	0	0	0	0	0	0	0	0	0	0	0	0
3778	Kcnma1	0	1	0	1	0	0	0	0	0	0	0	0	0	1	0	0	0	0	0	0	0	0	0	0	0	0	0	0	0
55226	Nat10	0	0	1	0	0	0	1	0	0	1	0	0	0	0	0	0	0	0	0	0	0	0	0	0	0	0	0	0	0
114987	Wdr31	0	0	0	1	0	0	0	1	0	0	0	0	0	0	0	0	0	0	0	0	0	0	0	0	0	0	0	0	0
54947	Lpcat2	0	1	0	0	0	0	0	1	0	0	0	0	0	0	0	0	0	1	0	0	0	0	0	0	0	0	0	0	0
6359	Ccl9	0	0	0	1	0	0	0	1	0	0	0	0	0	0	0	0	0	0	0	0	0	0	0	0	0	0	0	0	0
26038	Chd5	0	1	0	1	0	0	0	0	0	0	0	0	0	0	0	0	0	0	0	0	0	0	0	0	0	0	0	0	0
10938	Ehd1	1	0	0	0	0	0	1	0	0	0	0	0	0	1	0	0	0	0	0	0	0	0	0	0	0	0	0	0	0
56261	Gpcpd1	0	1	0	1	0	0	0	0	0	0	0	0	0	0	0	0	0	1	0	0	0	0	0	0	0	0	0	0	0
8476	Cdc42bpa	0	1	0	1	0	0	0	0	0	0	0	0	1	0	0	0	0	0	0	0	0	0	0	0	0	0	0	0	0
6182	Mrpl12	1	0	1	0	0	0	0	0	0	1	0	0	0	0	0	0	0	0	0	0	0	0	0	0	0	0	0	0	0
5046	Pcsk6	0	1	0	1	0	0	0	0	0	0	0	1	0	0	0	0	0	0	0	0	0	0	0	0	0	0	0	0	0
124599	Cd300lb	0	1	0	0	0	0	0	1	0	0	0	0	0	0	0	0	0	0	0	0	0	0	0	0	0	0	0	0	0
815	Camk2a	0	1	0	1	0	0	0	0	0	0	0	0	0	0	1	0	0	0	0	1	0	0	0	0	0	0	1	1	0
51661	Fkbp7	0	1	0	0	1	0	0	0	0	0	0	0	0	0	0	0	0	0	0	0	0	0	0	0	0	0	0	0	0
2597	Gapdh	1	0	0	0	0	0	1	0	0	0	0	0	0	0	0	0	1	0	0	0	0	0	0	0	0	0	0	0	0
5879	Rac1	1	0	1	0	0	0	0	0	0	1	1	1	1	1	0	1	0	0	1	0	1	0	0	0	0	0	1	0	0
9342	Snap29	1	0	1	0	0	0	0	0	0	0	0	0	0	0	0	1	0	0	0	0	1	0	0	0	0	0	0	0	0
93183	Pigm	0	1	0	1	0	0	0	0	0	0	0	0	0	0	0	0	0	0	0	0	0	0	0	0	0	0	0	0	0
5327	Plat	0	1	0	0	0	0	0	1	0	0	0	1	0	1	0	0	0	0	0	0	0	0	0	0	0	0	0	0	0
51194	Ipo11	0	0	1	0	1	0	0	0	0	0	0	0	0	0	0	0	0	0	0	0	0	0	0	0	0	0	0	0	0
1376	Cpt2	0	0	0	1	0	0	0	1	0	0	0	0	0	0	0	0	0	1	0	0	0	0	0	0	0	0	0	0	0
51474	Lima1	0	1	1	0	0	0	0	0	0	0	0	0	0	0	0	0	0	0	0	0	0	0	0	0	0	0	0	0	0
3965	Lgals9	0	1	0	0	0	0	0	1	0	0	0	0	0	0	0	0	0	0	0	1	0	0	0	0	0	0	0	0	0
203	Ak1	0	0	0	0	0	0	1	1	0	0	0	0	0	0	0	0	0	0	0	0	0	0	0	0	0	0	0	0	0
192111	Pgam5	0	0	0	0	1	0	1	0	0	0	0	0	0	0	0	0	0	0	0	0	0	0	0	0	0	0	0	0	0
266743	Npas4	0	1	0	1	0	0	0	0	0	0	0	0	0	0	0	0	0	0	0	0	0	0	0	0	0	0	0	0	0
6674	Spag1	0	1	0	0	0	0	0	1	0	0	0	0	0	0	0	0	0	0	0	0	0	0	0	0	0	0	0	0	0
22807	Ikzf2	0	1	0	1	0	0	0	0	0	0	0	0	0	0	0	0	0	0	0	0	0	0	0	0	0	0	0	0	0
7494	Xbp1	0	1	0	0	0	0	0	1	0	0	0	0	0	0	1	0	0	0	0	0	0	0	0	0	0	0	0	0	0
2697	Gja1	0	1	0	1	0	0	0	0	0	0	0	0	1	0	0	0	0	0	0	0	1	0	0	0	0	0	0	0	0
83643	Ccdc3	0	1	0	0	0	0	0	1	0	0	0	0	0	0	0	0	0	0	0	0	0	0	0	0	0	0	0	0	0
9551	Atp5j2	1	0	1	0	0	0	0	0	0	0	0	0	0	0	0	0	0	0	0	0	0	0	0	1	0	0	0	0	0
2052	Ephx1	1	0	1	0	0	0	0	0	0	0	0	0	0	0	0	0	0	0	0	0	0	0	0	0	0	0	0	0	0
444	Asph	1	0	1	0	0	0	0	0	0	0	0	0	0	0	0	0	0	0	0	0	0	0	0	0	0	0	0	1	0
58477	Srprb	1	0	1	0	0	0	0	0	0	1	0	0	0	0	1	0	0	0	0	0	0	0	0	0	0	0	0	0	0
9181	Arhgef2	1	0	1	0	0	0	0	0	0	0	0	0	1	0	0	0	0	0	0	0	0	0	0	0	0	0	0	0	0
523	Atp6v1a	1	0	0	0	0	0	1	0	0	1	0	1	0	0	1	0	0	0	0	0	0	0	0	0	0	0	0	0	0
54606	Ddx56	0	0	0	0	1	0	1	0	0	0	0	0	0	0	0	0	0	0	0	0	0	0	0	0	0	0	0	0	0
64236	Pdlim2	0	0	0	0	0	1	1	0	0	0	0	0	0	0	0	0	0	0	0	0	0	0	0	0	0	0	0	0	0
26985	Ap3m1	0	0	1	0	1	0	0	0	0	0	0	0	0	0	0	0	0	0	0	0	0	0	0	0	0	0	0	0	0
54919	Dnaaf5	0	0	0	0	0	0	1	1	0	0	0	0	0	0	0	0	0	0	0	0	0	0	0	0	0	0	0	0	0
9315	Nrep	0	1	0	0	0	0	0	1	0	0	0	0	0	0	0	0	0	0	0	0	0	0	0	0	0	0	0	0	0
9245	Gcnt3	0	1	0	1	0	0	0	0	0	0	0	0	0	0	0	0	0	0	0	0	0	0	0	0	0	0	0	0	0
79073	Tmem109	1	0	1	0	0	0	0	0	0	0	0	0	0	0	0	0	0	0	0	0	0	0	0	0	0	0	0	0	0
23331	Ttc28	0	1	0	0	0	0	0	1	0	0	0	0	0	0	0	0	0	0	0	0	0	0	0	0	0	0	0	0	0
7408	Vasp	0	1	0	1	0	0	0	0	0	0	1	0	0	0	0	0	0	0	0	0	0	0	0	0	0	0	0	0	0
3241	Hpcal1	0	0	0	0	1	0	1	0	0	0	0	0	0	0	0	0	0	0	0	0	0	0	0	0	0	0	0	0	0
7867	Mapkapk3	0	1	0	1	0	0	0	0	0	0	0	1	0	0	1	0	0	0	0	1	0	0	0	0	0	0	0	0	0
51703	Acsl5	1	0	1	0	0	0	0	0	0	0	0	0	0	0	0	0	0	1	0	0	0	0	0	0	0	0	0	0	0
387119	Cep85l	0	0	0	1	0	0	0	1	0	0	0	0	0	0	0	0	0	0	0	0	0	0	0	0	0	0	0	0	0
11266	Dusp12	0	1	0	1	0	0	0	0	0	0	0	0	0	0	0	0	0	0	0	0	0	0	0	0	0	0	0	0	0
57326	Pbxip1	0	1	0	0	0	0	0	1	0	0	0	0	0	0	0	0	0	0	0	0	0	0	0	0	0	0	0	0	0
23481	Pes1	1	0	1	0	0	0	0	0	0	1	0	0	0	0	0	0	0	0	0	0	0	0	0	0	0	0	0	0	0
5990	Rfx2	0	1	0	1	0	0	0	0	0	0	0	0	0	0	0	0	0	0	0	0	0	0	0	0	0	0	0	0	0
8839	Ccn5	0	0	0	1	0	0	0	1	0	0	0	0	0	0	0	0	0	0	0	0	0	0	0	0	0	0	0	0	0
1464	Cspg4	0	1	0	1	0	0	0	0	0	0	0	0	0	0	0	0	1	0	0	0	0	0	0	0	0	0	0	0	0
66004	Lynx1	0	1	0	1	0	0	0	0	0	0	0	0	0	0	0	0	0	0	0	0	0	0	0	0	0	0	0	0	0
2593	Gamt	0	1	0	0	0	0	1	0	0	0	0	0	0	0	0	0	0	0	0	0	0	0	0	0	0	0	0	0	0
3097	Hivep2	0	1	0	0	0	0	0	1	0	0	0	0	0	0	0	0	0	0	0	0	0	0	0	0	0	0	0	0	0
7091	Tle4	0	1	0	1	0	0	0	0	0	0	0	0	0	0	0	0	0	0	0	0	0	0	0	0	0	0	0	0	0
57619	Shroom3	0	1	0	1	0	0	0	0	0	0	0	0	0	0	0	0	0	0	0	0	0	0	0	0	0	0	0	0	0
85446	Zfhx2	0	1	0	0	0	0	0	1	0	0	0	0	0	0	0	0	0	0	0	0	0	0	0	0	0	0	0	0	0
1808	Dpysl2	0	0	0	0	1	0	1	0	0	0	1	0	0	0	0	0	0	0	0	0	0	0	0	0	0	0	0	0	0
3159	Hmga1	0	1	0	0	0	0	0	1	0	0	0	0	0	0	1	0	0	0	0	0	0	0	0	0	0	0	0	0	0
4053	Ltbp2	0	1	0	1	0	0	0	0	1	0	0	0	0	0	0	0	0	0	0	0	0	1	0	0	0	0	0	0	0
9218	Vapa	1	0	1	0	0	0	0	0	0	0	0	0	0	0	0	1	0	1	0	0	0	0	0	0	0	0	0	0	0
10397	Ndrg1	0	0	0	0	1	0	1	0	0	0	0	0	0	0	0	0	0	0	0	0	0	0	0	0	0	0	0	0	0
5783	Ptpn13	0	0	0	1	0	0	0	1	0	0	0	0	1	0	0	0	0	1	0	1	0	0	0	0	0	0	0	0	0
11015	Kdelr3	0	1	0	0	0	0	0	1	0	0	0	0	0	0	1	0	0	0	0	0	1	0	0	0	0	0	0	0	0
221692	Phactr1	0	1	0	0	0	0	0	1	0	0	0	0	0	0	0	0	0	0	0	0	0	0	0	0	0	0	0	0	0
11332	Acot7	0	0	1	0	1	0	0	0	0	0	0	0	0	0	0	0	0	1	0	0	0	0	0	0	0	0	0	0	0
25777	Sun2	1	0	0	0	0	0	0	1	0	0	0	0	0	0	0	0	0	0	0	0	0	0	0	0	0	0	0	0	0
28999	Klf15	0	0	0	1	0	0	0	1	0	0	0	0	0	0	0	0	0	0	0	0	0	0	0	0	0	0	0	0	0
389610	Xkr5	0	1	0	0	0	0	0	1	0	0	0	0	0	0	0	0	0	0	0	0	0	0	0	0	0	0	0	0	0
5286	Pik3c2a	0	1	0	1	0	0	0	0	0	0	0	0	0	0	0	0	0	1	0	0	1	0	0	0	0	0	0	0	0
8612	Plpp2	0	1	0	1	0	0	0	0	0	0	0	0	0	0	0	0	0	1	0	0	0	0	0	0	0	0	0	0	0
55832	Cand1	0	1	0	1	0	0	0	0	0	0	0	0	0	0	0	1	0	0	0	0	0	0	0	0	0	0	0	0	0
22954	Trim32	0	0	0	0	0	0	1	1	0	0	0	0	0	0	0	0	0	0	0	0	0	0	0	0	0	0	0	0	0
57689	Lrrc4c	0	1	0	0	0	1	0	0	0	0	0	0	0	0	0	0	0	0	0	0	0	0	0	0	0	0	0	0	0
1512	Ctsh	0	1	0	1	0	0	0	0	0	0	0	0	0	0	0	1	0	0	0	0	0	0	0	0	0	0	0	0	0
6347	Ccl7;Ccl2	0	0	0	1	0	0	0	1	0	0	0	0	0	0	1	0	0	0	0	1	0	0	0	0	0	0	0	0	0
36	Acadsb	1	0	0	0	0	0	1	0	0	1	0	0	0	0	0	0	0	0	0	0	0	0	0	0	0	0	0	0	0
128178	Edaradd	0	1	0	0	0	1	0	0	0	0	0	0	0	0	0	0	0	0	0	1	0	0	0	0	0	0	0	0	0
6642	Snx1	1	0	1	0	0	0	0	0	0	0	0	0	0	0	0	0	0	0	0	0	0	0	0	0	0	0	0	0	0
55964	Septin3	0	1	0	1	0	0	0	0	0	0	0	0	0	0	0	0	0	0	0	0	0	0	0	0	0	0	0	0	0
11180	Wdr6	0	1	1	0	0	0	0	0	0	0	0	0	1	0	0	0	0	0	0	0	0	0	0	0	0	0	0	0	0
9567	Gtpbp1	0	0	0	0	0	0	1	1	0	0	0	0	0	0	0	0	0	0	0	0	0	0	0	0	0	0	0	0	0
154215	Nkain2	0	1	0	0	0	1	0	0	0	0	0	0	0	0	0	0	0	0	0	0	0	0	0	0	0	0	0	0	0
84263	Hsdl2	0	0	0	1	0	0	0	1	0	0	0	0	0	0	0	0	0	0	0	0	0	0	0	0	0	0	0	0	0
3703	Stt3a	1	0	1	0	0	0	0	0	0	0	0	0	0	0	0	0	0	0	0	0	0	0	0	0	0	0	0	0	0
6158	Rpl28	1	0	1	0	0	0	0	0	0	1	1	0	0	0	1	0	0	0	0	0	0	0	0	0	0	0	0	0	0
26135	Serbp1	1	0	1	0	0	0	0	0	0	0	0	0	0	0	0	0	0	0	0	0	0	0	0	0	0	0	0	0	0
5664	Psen2	0	1	0	1	0	0	0	0	0	0	1	1	0	0	0	0	0	0	0	0	0	0	0	0	0	0	1	0	0
22848	Aak1	1	0	1	0	0	0	0	0	0	0	0	0	0	0	0	0	0	0	0	0	1	0	0	0	0	0	0	0	0
63892	Thada	1	0	1	0	0	0	0	0	0	1	0	0	0	0	0	0	0	0	0	0	0	0	0	0	0	0	0	0	0
7112	Tmpo	1	0	1	0	0	0	0	0	0	0	0	0	1	0	0	0	0	0	0	0	0	0	0	0	0	0	0	0	0
23600	Amacr	1	0	1	0	0	0	0	0	0	0	0	0	0	0	0	0	0	1	0	0	0	0	0	0	0	0	0	0	0
10516	Fbln5	0	0	0	1	0	0	0	1	1	0	0	0	0	0	0	0	0	0	0	0	0	1	0	0	0	0	0	0	0
55706	Ndc1	0	1	0	0	0	0	0	1	0	0	0	0	0	0	1	0	1	0	0	1	0	0	0	0	0	0	0	0	0
399512	Slc25a35	0	0	0	1	0	0	0	1	0	0	0	0	0	0	0	0	0	0	0	0	0	0	0	0	0	0	0	0	0
4837	Nnmt	0	0	0	1	0	1	0	0	0	0	0	0	0	0	0	0	0	0	0	0	0	0	0	0	0	0	0	0	0
2554	Gabra1	0	0	0	1	0	0	0	1	0	0	0	1	0	0	0	0	0	0	0	0	0	0	0	0	0	0	0	0	0
94121	Sytl4	0	1	0	1	0	0	0	0	0	0	0	0	0	1	0	0	0	0	0	0	0	0	0	0	0	0	0	0	0
10457	Gpnmb	0	0	0	1	0	0	0	1	0	0	0	0	0	0	0	0	0	0	0	0	0	0	0	0	0	0	0	0	0
25999	Clip3	0	1	0	0	0	0	0	1	0	0	0	0	0	0	0	0	0	0	0	0	0	0	0	0	0	0	0	0	0
4281	Mid1	0	0	0	1	0	0	0	1	0	0	0	0	0	0	0	0	0	0	0	1	0	0	0	0	0	0	0	0	0
10763	Nes	0	0	0	1	1	0	0	0	0	0	0	0	0	0	0	0	0	0	0	0	0	0	0	0	0	0	0	0	0
139411	Ptchd1	0	1	0	0	0	0	0	1	0	0	0	0	0	0	0	0	0	0	0	0	0	0	0	0	0	0	0	0	0
8209	Gatd3a	1	0	1	0	0	0	0	0	0	0	0	0	0	0	0	0	0	0	0	0	0	0	0	0	0	0	0	0	0
51706	Cyb5r1	0	0	1	0	0	0	1	0	0	0	0	0	0	1	0	0	0	0	0	0	0	0	0	0	0	0	0	0	0
10318	Tnip1	0	0	0	1	0	0	0	1	0	0	0	0	0	0	0	0	0	0	0	0	0	0	0	0	0	0	0	0	0
8435	Soat2	0	1	0	1	0	0	0	0	0	0	0	0	0	0	0	0	0	0	0	0	0	0	0	0	0	0	0	0	0
6645	Sntb2	1	0	1	0	0	0	0	0	0	0	0	0	0	0	0	0	0	0	0	0	0	0	0	0	0	0	0	0	0
358	Aqp1	0	1	0	1	0	0	0	0	0	0	0	0	0	0	0	0	0	0	0	0	0	0	0	0	0	0	0	0	0
55753	Ogdhl	0	1	0	0	0	0	0	1	0	0	0	0	0	0	0	0	0	0	0	0	0	0	0	0	0	0	0	0	0
1632	Eci1	1	0	1	0	0	0	0	0	0	0	0	0	0	0	0	0	0	1	0	0	0	0	0	0	0	0	0	0	0
4534	Mtm1	0	0	0	1	0	0	0	1	0	0	0	0	0	0	0	0	0	1	0	0	0	0	0	0	0	0	0	0	0
389136	Vgll3	0	1	0	1	0	0	0	0	0	0	0	0	0	0	0	0	0	0	0	0	0	0	0	0	0	0	0	0	0
83787	Armc10	1	0	1	0	0	0	0	0	0	0	0	0	0	0	0	0	0	0	0	0	0	0	0	0	0	0	0	0	0
11135	Cdc42ep1	0	0	0	1	0	0	0	1	0	0	0	0	1	0	0	0	0	0	0	0	0	0	0	0	0	0	0	0	0
83871	Rab34	1	0	1	0	0	0	0	0	0	0	0	0	0	0	0	0	0	0	0	0	0	0	0	0	0	0	0	0	0
9128	Prpf4	0	0	1	0	0	0	0	1	0	1	0	0	0	0	0	0	0	0	0	0	0	0	0	0	0	0	0	0	0
7353	Ufd1	0	0	1	0	1	0	0	0	0	0	0	0	0	0	0	0	0	0	0	0	0	0	0	0	0	0	0	0	0
10432	Rbm14	1	0	1	0	0	0	0	0	0	0	0	0	0	0	0	0	0	0	0	0	0	0	0	0	0	0	0	0	0
9416	Ddx23	1	0	0	0	0	0	1	0	0	0	0	0	0	0	0	0	0	0	0	0	0	0	0	0	0	0	0	0	0
151393	Rmdn2	0	1	0	1	0	0	0	0	0	0	0	0	0	0	0	0	0	0	0	0	0	0	0	0	0	0	0	0	0
58527	Abracl	0	1	0	1	0	0	0	0	0	0	0	0	0	0	0	0	0	0	0	0	0	0	0	0	0	0	0	0	0
347733	Tubb2b	0	0	0	1	0	0	0	1	0	0	1	0	1	1	1	0	0	0	0	0	1	0	0	0	0	0	0	0	0
1992	Serpinb1a	0	0	0	1	0	0	0	1	0	0	0	0	0	0	0	1	0	0	0	0	0	0	0	0	0	0	0	0	0
121457	Ikbip	0	1	1	0	0	0	0	0	0	0	0	0	0	0	0	0	0	0	0	0	0	0	0	0	0	0	0	0	0
134728	Irak1bp1	0	1	0	1	0	0	0	0	0	0	0	0	0	0	0	0	0	0	0	0	0	0	0	0	0	0	0	0	0
5984	Rfc4	0	0	0	0	1	0	1	0	0	0	0	0	0	0	0	0	0	0	0	0	0	0	0	0	0	0	0	0	0
9498	Slc4a8	0	1	0	1	0	0	0	0	0	0	0	0	0	0	0	0	0	0	0	0	0	0	0	0	0	0	0	0	0
10797	Mthfd2	0	0	1	0	1	0	0	0	0	0	0	0	0	0	0	0	0	0	0	0	0	0	0	0	0	0	0	0	0
222663	Scube3	0	1	0	1	0	0	0	0	1	0	0	0	0	0	0	0	0	0	0	0	0	0	0	0	0	0	0	0	0
203238	Ccdc171	0	0	0	1	0	0	0	1	0	0	0	0	0	0	0	0	0	0	0	0	0	0	0	0	0	0	0	0	0
10268	Ramp3	0	1	0	1	0	0	0	0	0	0	0	0	0	0	0	0	0	0	0	0	0	0	0	0	0	0	0	0	0
8395	Pip5k1b	0	0	0	1	0	0	0	1	0	0	0	0	0	0	0	0	0	1	0	0	0	0	0	0	0	0	1	0	0
389432	Samd5	0	0	0	1	0	0	0	1	0	0	0	0	0	0	0	0	0	0	0	0	0	0	0	0	0	0	0	0	0
54741	Leprot	0	0	0	1	0	0	0	1	0	0	0	0	0	0	0	0	0	0	0	0	0	0	0	0	0	0	0	0	0
7048	Tgfbr2	0	1	0	1	0	0	0	0	0	0	0	0	0	0	0	0	0	0	0	0	0	0	0	0	0	0	1	0	0
28952	Ccdc22	0	0	1	0	1	0	0	0	0	0	0	0	0	0	0	0	0	0	0	0	0	0	0	0	0	0	0	0	0
79577	Cdc73	0	0	0	0	1	0	1	0	0	0	0	0	0	0	0	0	0	0	0	0	0	0	0	0	0	0	0	0	0
4720	Ndufs2	1	0	1	0	0	0	0	0	0	0	0	0	0	0	0	0	0	0	0	0	0	0	0	1	0	0	0	0	0
862	Runx1t1	0	1	0	0	0	0	0	1	0	0	0	0	0	0	0	0	0	0	0	0	0	0	0	0	0	0	0	0	0
50848	F11r	0	1	0	0	0	0	0	1	1	0	0	0	0	1	0	0	0	0	1	0	0	0	0	0	0	0	0	0	0
54996	Mtarc2	1	0	1	0	0	0	0	0	0	0	0	0	0	0	0	0	0	0	0	0	0	0	0	0	0	0	0	0	0
55638	Sybu	0	1	0	1	0	0	0	0	0	0	0	0	0	0	0	0	0	0	0	0	0	0	0	0	0	0	0	0	0
51602	Nop58	1	0	1	0	0	0	0	0	0	1	0	0	0	0	0	0	0	0	0	0	0	0	0	0	0	0	0	0	0
10509	Sema4b	0	1	0	1	0	0	0	0	0	0	0	0	0	0	0	0	0	0	0	0	0	0	0	0	0	0	0	0	0
11069	Rapgef4	0	1	0	1	0	0	0	0	0	0	0	0	0	1	0	0	0	0	0	0	0	0	0	0	0	0	0	0	0
3148	Hmgb2	1	0	1	0	0	0	0	0	0	0	0	0	0	0	0	0	0	0	0	0	0	0	0	0	0	0	0	0	0
126374	Wtip	0	1	0	1	0	0	0	0	0	0	0	0	0	0	1	0	0	0	0	0	0	0	0	0	0	0	0	0	0
9761	Mlec	1	0	1	0	0	0	0	0	0	0	0	0	0	0	0	1	0	0	0	0	0	0	0	0	0	0	0	0	0
51050	Pi15	0	0	0	1	0	0	0	1	0	0	0	0	0	0	0	0	0	0	0	0	0	0	0	0	0	0	0	0	0
85315	Paqr8	0	1	0	1	0	0	0	0	0	0	0	0	0	0	0	0	0	0	0	0	0	0	0	0	0	0	0	0	0
4430	Myo1b	1	0	0	0	1	0	0	0	0	0	0	0	0	0	0	0	0	0	0	0	0	0	0	0	0	0	0	0	0
6185	Rpn2	1	0	1	0	0	0	0	0	0	1	0	0	0	0	0	0	0	0	0	0	0	0	0	0	0	0	0	0	0
158135	Ttll11	0	1	0	1	0	0	0	0	0	0	0	0	0	0	0	0	0	0	0	0	0	0	0	0	0	0	0	0	0
10370	Cited2	0	1	0	1	0	0	0	0	0	0	0	0	0	0	1	0	0	0	0	0	0	0	0	0	0	0	0	0	0
3479	Igf1	0	1	0	1	0	0	0	0	0	0	0	1	0	1	0	0	0	0	0	0	0	0	1	0	0	0	0	0	0
55034	Mocos	0	1	0	0	0	0	0	1	0	0	0	0	0	0	0	0	0	0	0	0	0	0	0	0	0	0	0	0	0
8322	Fzd4	0	0	0	1	0	0	0	1	0	0	0	0	0	0	0	0	0	0	0	0	1	0	0	0	0	0	1	0	0
595	Ccnd1	0	1	0	1	0	0	0	0	0	0	0	0	0	0	0	0	0	0	0	1	0	0	0	0	0	0	0	0	0
5798	Ptprn	0	0	0	1	0	0	0	1	0	0	0	0	0	0	0	0	0	0	0	0	0	0	0	0	0	0	0	0	0
10200	Mphosph6	0	1	0	1	0	0	0	0	0	0	0	0	0	0	0	0	0	0	0	0	0	0	0	0	0	0	0	0	0
2805	Got1	0	0	0	0	1	0	1	0	0	0	0	0	0	0	0	0	1	0	0	0	0	0	0	0	0	0	0	0	0
9509	Adamts2	0	1	0	1	0	0	0	0	1	0	0	0	0	0	0	0	0	0	0	0	0	0	0	0	0	0	0	0	0
64840	Porcn	0	0	0	0	0	0	0	1	0	0	0	0	0	0	0	0	0	0	0	0	0	0	0	0	0	0	1	0	0
55733	Hhat	0	0	0	0	0	0	0	1	0	0	0	0	0	0	0	0	0	0	0	0	0	0	0	0	0	0	0	0	0
2180	Acsl1	0	0	0	0	0	1	0	0	0	0	0	0	0	0	0	0	0	1	0	0	0	0	0	0	0	0	0	0	0
157695	Tdrp	0	0	0	0	0	0	0	1	0	0	0	0	0	0	0	0	0	0	0	0	0	0	0	0	0	0	0	0	0
91978	Tpgs1	0	1	0	0	0	0	0	0	0	0	0	0	0	0	0	0	0	0	0	0	0	0	0	0	0	0	0	0	0
8727	Ctnnal1	0	0	0	1	0	0	0	0	0	0	0	0	0	0	0	0	0	0	0	0	0	0	0	0	0	0	0	0	0
3786	Kcnq3	0	1	0	0	0	0	0	0	0	0	1	0	0	0	0	0	0	0	0	0	0	0	0	0	0	0	0	0	0
51133	Kctd3	0	1	0	0	0	0	0	0	0	0	0	0	1	0	0	0	0	0	0	0	0	0	0	0	0	0	0	0	0
5093	Pcbp1	1	0	0	0	0	0	0	0	0	0	0	0	0	0	0	0	0	0	0	0	0	0	0	0	0	0	0	0	0
1280	Col2a1	0	1	0	0	0	0	0	0	1	0	1	1	0	0	0	0	0	0	1	0	0	0	0	0	0	0	0	0	0
30818	Kcnip3	0	0	0	1	0	0	0	0	0	0	0	0	0	0	0	0	0	0	0	0	0	0	0	0	0	0	0	1	0
51330	Tnfrsf12a	0	0	0	1	0	0	0	0	0	0	0	0	0	0	0	0	0	0	0	1	0	0	0	0	0	0	0	0	0
6230	Rps25	1	0	0	0	0	0	0	0	0	1	1	0	0	0	1	0	0	0	0	0	0	0	0	0	0	0	0	0	0
5723	Psph	0	0	1	0	0	0	0	0	0	0	0	0	0	0	0	0	0	0	0	0	0	0	0	0	0	0	0	0	0
388886	Lrrc75b	0	1	0	0	0	0	0	0	0	0	0	0	0	0	0	0	0	0	0	0	0	0	0	0	0	0	0	0	0
7942	Tfeb	0	1	0	0	0	0	0	0	0	0	0	0	0	0	0	0	0	0	0	0	0	0	0	0	0	0	0	0	0
3030	Hadha	0	0	0	0	0	0	1	0	0	0	0	0	0	0	0	0	0	1	0	0	0	0	0	0	0	0	0	0	0
493856	Cisd2	0	0	0	0	0	0	1	0	0	0	0	0	0	0	0	0	0	0	0	0	0	0	0	0	0	0	0	0	0
5709	Psmd3	1	0	0	0	0	0	0	0	0	1	1	0	0	0	1	1	0	0	0	1	0	0	0	0	0	0	1	0	0
404217	Ctxn1	0	1	0	0	0	0	0	0	0	0	0	0	0	0	0	0	0	0	0	0	0	0	0	0	0	0	0	0	0
57019	Ciapin1	0	0	0	0	0	0	1	0	0	0	0	0	0	0	0	0	0	0	0	0	0	0	0	0	0	0	0	0	0
2051	Ephb6	0	0	0	1	0	0	0	0	0	0	1	0	0	0	0	0	0	0	0	0	0	0	0	0	0	0	0	0	0
1809	Dpysl3	0	0	0	0	0	0	1	0	0	0	1	0	0	0	0	0	0	0	0	0	0	0	0	0	0	0	0	0	0
6331	Scn5a	0	0	0	0	0	0	0	1	0	0	1	0	0	0	0	0	0	0	0	0	0	0	0	0	0	0	0	1	0
6567	Slc16a2	0	1	0	0	0	0	0	0	0	0	0	0	0	0	0	0	0	0	0	0	0	0	0	0	0	0	0	0	0
9638	Fez1	0	0	0	0	0	0	0	1	0	0	0	0	0	0	0	0	0	0	0	0	0	0	0	0	0	0	0	0	0
124401	Anks3	0	0	0	0	0	0	0	1	0	0	0	0	0	0	0	0	0	0	0	0	0	0	0	0	0	0	0	0	0
54800	Klhl24	0	0	0	1	0	0	0	0	0	0	0	0	0	0	0	0	0	0	0	0	0	0	0	0	0	0	0	0	0
83941	Tm2d1	0	1	0	0	0	0	0	0	0	0	0	0	0	0	0	0	0	0	0	0	0	0	0	0	0	0	0	0	0
2524	Sec1	0	0	0	1	0	0	0	0	0	0	0	0	0	0	0	0	1	0	0	0	0	0	0	0	0	0	0	0	0
1820	Arid3a	0	0	0	0	0	0	0	1	0	0	0	0	0	0	0	0	0	0	0	0	0	0	0	0	0	0	0	0	0
29894	Cpsf1	1	0	0	0	0	0	0	0	0	0	0	0	0	0	0	0	0	0	0	0	0	0	0	0	0	0	0	0	0
23333	Dpy19l1	0	0	0	0	0	0	0	1	0	0	0	0	0	0	0	0	0	0	0	0	0	0	0	0	0	0	0	0	0
84858	Zfp503	0	1	0	0	0	0	0	0	0	0	0	0	0	0	0	0	0	0	0	0	0	0	0	0	0	0	0	0	0
5420	Podxl	0	1	0	0	0	0	0	0	0	0	0	0	0	0	0	0	0	0	0	0	0	0	0	0	0	0	0	0	0
4659	Ppp1r12a	0	1	0	0	0	0	0	0	0	0	0	0	1	0	0	0	0	0	0	0	0	0	0	0	0	0	0	0	0
399474	Tmem200b	0	0	0	0	0	0	0	1	0	0	0	0	0	0	0	0	0	0	0	0	0	0	0	0	0	0	0	0	0
140738	Tmem37	0	0	0	0	0	0	0	1	0	0	0	0	0	0	0	0	0	0	0	0	0	0	0	0	0	0	0	0	0
256158	Hmcn2	0	0	0	0	0	0	0	1	0	0	0	0	0	0	0	0	0	0	0	0	0	0	0	0	0	0	0	0	0
27163	Naaa	0	0	0	1	0	0	0	0	0	0	0	0	0	0	0	0	0	0	0	0	0	0	0	0	0	0	0	0	0
11163	Nudt4	0	1	0	0	0	0	0	0	0	0	0	0	0	0	0	0	0	0	0	0	0	0	0	0	0	0	0	0	0
89849	Atg16l2	0	0	0	0	0	0	0	1	0	0	0	0	0	0	0	0	0	0	0	0	0	0	0	0	0	0	0	0	0
728858	1700034J05Rik	0	0	0	0	0	0	0	1	0	0	0	0	0	0	0	0	0	0	0	0	0	0	0	0	0	0	0	0	0
284358	Mamstr	0	0	0	1	0	0	0	0	0	0	0	0	0	0	0	0	0	0	0	0	0	0	0	0	0	0	0	0	0
54795	Trpm4	0	0	0	1	0	0	0	0	0	0	0	0	0	0	0	0	0	0	0	0	0	0	0	0	0	0	0	0	0
9512	Pmpcb	0	0	0	0	1	0	0	0	0	0	0	0	0	0	0	0	0	0	0	0	0	0	0	0	0	0	0	0	0
55553	Sox6	0	0	0	1	0	0	0	0	0	0	0	0	0	0	0	0	0	0	0	0	0	0	0	0	0	0	0	0	0
114897	C1qtnf1	0	0	0	0	0	0	0	1	0	0	0	0	0	0	0	0	0	0	0	0	0	0	0	0	0	0	0	0	0
5592	Prkg1	0	1	0	0	0	0	0	0	0	0	0	0	0	1	0	0	0	0	0	0	0	0	0	0	0	0	0	0	0
100130988	Spata48	0	1	0	0	0	0	0	0	0	0	0	0	0	0	0	0	0	0	0	0	0	0	0	0	0	0	0	0	0
284695	Zfp326	0	0	1	0	0	0	0	0	0	0	0	0	0	0	0	0	0	0	0	0	0	0	0	0	0	0	0	0	0
29094	Lgalsl	0	1	0	0	0	0	0	0	0	0	0	0	0	0	0	0	0	0	0	0	0	0	0	0	0	0	0	0	0
9957	Hs3st1	0	0	0	0	0	0	0	1	0	0	0	0	0	0	0	0	1	0	0	0	0	0	0	0	0	0	0	0	0
27129	Hspb7	0	1	0	0	0	0	0	0	0	0	0	0	0	0	0	0	0	0	0	0	0	0	0	0	0	0	0	0	0
55781	Riok2	0	0	0	1	0	0	0	0	0	0	0	0	0	0	0	0	0	0	0	0	0	0	0	0	0	0	0	0	0
4976	Opa1	0	0	1	0	0	0	0	0	0	0	0	0	0	0	0	0	0	0	0	0	0	0	0	0	0	0	0	0	0
347273	Cavin4	1	0	0	0	0	0	0	0	0	0	0	0	0	0	0	0	0	0	0	0	0	0	0	0	0	0	0	0	0
57645	Pogk	0	0	0	1	0	0	0	0	0	0	0	0	0	0	0	0	0	0	0	0	0	0	0	0	0	0	0	0	0
6832	Supv3l1	0	0	1	0	0	0	0	0	0	0	0	0	0	0	0	0	0	0	0	0	0	0	0	0	0	0	0	0	0
781	Cacna2d1	0	0	0	0	0	0	0	1	0	0	0	0	0	0	0	0	0	0	0	0	0	0	0	0	0	0	0	0	0
3956	Lgals1	0	0	0	0	1	0	0	0	0	0	0	0	0	0	0	0	0	0	0	0	0	0	1	0	0	0	0	0	0
261726	Tiprl	0	1	0	0	0	0	0	0	0	0	0	0	0	0	0	0	0	0	0	0	0	0	0	0	0	0	0	0	0
219899	Tbcel	0	0	0	0	0	0	1	0	0	0	0	0	0	0	0	0	0	0	0	0	0	0	0	0	0	0	0	0	0
5228	Pgf	0	0	0	0	0	0	0	1	0	0	0	1	0	0	0	0	0	0	0	0	0	0	0	0	0	0	0	0	0
2548	Gaa	0	0	1	0	0	0	0	0	0	0	0	0	0	0	0	1	1	0	0	0	0	0	0	0	0	0	0	0	0
9394	Hs6st1	0	1	0	0	0	0	0	0	0	0	0	0	0	0	0	0	1	0	0	0	0	0	0	0	0	0	0	0	0
578	Bak1	0	0	0	1	0	0	0	0	0	0	0	0	0	0	0	0	0	0	0	0	0	0	0	0	0	0	0	0	0
10849	Cd3eap	0	0	0	1	0	0	0	0	0	0	0	0	0	0	0	0	0	0	0	0	0	0	0	0	0	0	0	0	0
85458	Dixdc1	0	0	0	1	0	0	0	0	0	0	0	0	0	0	0	0	0	0	0	0	0	0	0	0	0	0	0	0	0
9748	Slk	0	0	0	0	1	0	0	0	0	0	0	0	1	0	0	0	0	0	0	0	0	0	0	0	0	0	0	0	0
84976	Disp1	0	1	0	0	0	0	0	0	0	0	0	0	0	0	0	0	0	0	0	0	0	0	0	0	0	0	0	0	0
5026	P2rx5	0	1	0	0	0	0	0	0	0	0	0	0	0	1	0	0	0	0	0	0	0	0	0	0	0	0	0	0	0
166378	Spata5	0	0	1	0	0	0	0	0	0	0	0	0	0	0	0	0	0	0	0	0	0	0	0	0	0	0	0	0	0
10947	Ap3m2	0	0	0	1	0	0	0	0	0	0	0	0	0	0	0	0	0	0	0	0	0	0	0	0	0	0	0	0	0
5720	Psme1	1	0	0	0	0	0	0	0	0	1	1	0	0	0	1	0	0	0	0	1	0	0	0	0	0	0	1	0	0
154664	Abca13	0	0	0	0	0	0	0	1	0	0	0	0	0	0	0	1	0	0	0	0	0	0	0	0	0	0	0	0	0
5052	Prdx1	0	0	0	0	1	0	0	0	0	0	0	0	0	0	1	0	0	0	0	0	0	0	0	0	0	0	0	0	0
7345	Uchl1	0	1	0	0	0	0	0	0	0	0	0	0	0	0	0	0	0	0	0	0	0	0	0	0	0	0	0	0	0
84135	Utp15	0	0	1	0	0	0	0	0	0	1	0	0	0	0	0	0	0	0	0	0	0	0	0	0	0	0	0	0	0
5686	Psma5	0	0	0	1	0	0	0	0	0	0	1	0	0	0	1	1	0	0	0	1	0	0	0	0	0	0	1	0	0
28989	Ntmt1	0	0	0	1	0	0	0	0	0	0	0	0	0	0	0	0	0	0	0	0	0	0	0	0	0	0	0	0	0
80775	Tmem177	0	0	0	0	0	0	0	1	0	0	0	0	0	0	0	0	0	0	0	0	0	0	0	0	0	0	0	0	0
1678	Timm8a1	0	0	0	0	1	0	0	0	0	0	0	0	0	0	0	0	0	0	0	0	0	0	0	0	0	0	0	0	0
340371	Nrbp2	0	0	0	0	0	0	0	1	0	0	0	0	0	0	0	0	0	0	0	0	0	0	0	0	0	0	0	0	0
9915	Arnt2	0	0	0	0	0	0	0	1	0	0	0	0	0	0	0	0	0	1	0	0	0	0	0	0	0	0	0	0	0
80210	Armc9	0	1	0	0	0	0	0	0	0	0	0	0	0	0	0	0	0	0	0	0	0	0	0	0	0	0	0	0	0
4199	Me1	1	0	0	0	0	0	0	0	0	0	0	0	0	0	0	0	0	1	0	0	0	0	0	0	0	0	0	0	0
51129	Angptl4	0	0	0	0	0	0	0	1	0	0	0	0	0	0	0	0	0	1	0	0	0	0	0	0	0	0	0	0	0
9170	Lpar2	0	0	0	1	0	0	0	0	0	0	0	0	0	0	0	0	0	0	0	0	0	0	0	0	0	0	0	0	0
3759	Kcnj2	0	0	0	0	0	1	0	0	0	0	0	0	0	0	0	0	0	0	0	0	0	0	0	0	0	0	0	1	0
10160	Farp1	0	0	0	0	0	0	1	0	0	0	0	0	1	0	0	0	0	0	0	0	0	0	0	0	0	0	0	0	0
8601	Rgs20	0	0	0	0	0	0	0	1	0	0	0	0	0	0	0	0	0	0	0	0	0	0	0	0	0	0	0	0	0
85463	Zc3h12c	0	0	0	1	0	0	0	0	0	0	0	0	0	0	0	0	0	0	0	0	0	0	0	0	0	0	0	0	0
11328	Fkbp9	1	0	0	0	0	0	0	0	0	0	0	0	0	0	0	0	0	0	0	0	0	0	0	0	0	0	0	0	0
38	Acat1	0	0	0	0	1	0	0	0	0	0	0	0	0	0	0	0	0	1	0	0	0	0	0	0	0	0	0	0	0
81034	Slc25a32	0	0	0	0	0	0	0	1	0	0	0	0	0	0	0	0	0	0	0	0	0	0	0	0	0	0	0	0	0
6498	Skil	0	0	0	1	0	0	0	0	0	0	0	0	0	0	0	0	0	0	0	0	0	0	0	0	0	0	0	0	0
11315	Park7	1	0	0	0	0	0	0	0	0	0	0	0	0	0	0	0	0	0	0	0	0	0	0	0	0	0	0	0	0
9532	Bag2	0	0	0	1	0	0	0	0	0	0	0	0	0	0	1	0	0	0	0	0	0	0	0	0	0	0	0	0	0
5510	Ppp1r7	1	0	0	0	0	0	0	0	0	0	0	0	0	0	0	0	0	0	0	0	0	0	0	0	0	0	0	0	0
627	Bdnf	0	0	0	0	0	1	0	0	0	0	0	1	0	0	0	0	0	0	0	0	0	0	0	0	0	0	0	0	0
3140	Mr1	0	1	0	0	0	0	0	0	0	0	0	0	0	0	0	0	0	0	0	0	0	0	0	0	0	0	0	0	0
2908	Nr3c1	0	0	0	0	1	0	0	0	0	0	0	0	0	0	1	0	0	0	0	0	0	0	0	0	0	0	0	0	0
1743	Dlst	1	0	0	0	0	0	0	0	0	1	0	0	0	0	0	0	0	0	0	0	0	0	0	0	0	0	0	0	0
23729	Shpk	0	0	0	1	0	0	0	0	0	0	0	0	0	0	0	0	1	0	0	0	0	0	0	0	0	0	0	0	0
79605	Pgbd5	0	1	0	0	0	0	0	0	0	0	0	0	0	0	0	0	0	0	0	0	0	0	0	0	0	0	0	0	0
1718	Dhcr24	0	0	0	0	0	0	0	1	0	0	0	0	0	0	0	0	0	1	0	0	0	0	0	0	0	0	0	0	0
6304	Satb1	0	1	0	0	0	0	0	0	0	0	0	0	0	0	0	0	0	0	0	0	0	0	0	0	0	0	0	0	0
10085	Edil3	0	0	0	1	0	0	0	0	0	0	0	0	0	0	0	0	0	0	0	0	0	0	0	0	0	0	0	0	0
147923	Zfp52	0	0	0	1	0	0	0	0	0	0	0	0	0	0	0	0	0	0	0	0	0	0	0	0	0	0	0	0	0
23066	Cand2	0	0	0	0	0	0	0	1	0	0	0	0	0	0	0	0	0	0	0	0	0	0	0	0	0	0	0	0	0
5213	Pfkm	0	0	0	0	0	0	1	0	0	0	0	0	0	0	0	0	1	0	0	0	0	0	0	0	0	0	0	0	0
93663	Arhgap18	0	1	0	0	0	0	0	0	0	0	0	0	1	0	0	0	0	0	0	0	0	0	0	0	0	0	0	0	0
5698	Psmb9	0	0	0	0	0	0	0	1	0	0	1	0	0	0	1	0	0	0	0	1	0	0	0	0	0	0	1	0	0
8233	Zrsr1	0	0	0	0	0	0	0	1	0	0	0	0	0	0	0	0	0	0	0	0	0	0	0	0	0	0	0	0	0
9779	Tbc1d5	0	0	0	0	1	0	0	0	0	0	0	0	0	0	0	0	0	0	0	0	0	0	0	0	0	0	0	0	0
79902	Nup85	0	0	0	0	0	0	1	0	0	0	0	0	1	0	1	0	1	0	0	1	0	0	0	0	0	0	0	0	0
2356	Fpgs	0	0	0	0	0	1	0	0	0	0	0	0	0	0	0	0	0	0	0	0	0	0	0	0	0	0	0	0	0
80310	Pdgfd	0	0	0	0	0	0	0	1	0	0	0	1	0	0	0	0	0	0	0	0	0	0	0	0	0	0	0	0	0
91584	Plxna4	0	0	0	0	0	1	0	0	0	0	1	0	0	0	0	0	0	0	0	0	0	0	0	0	0	0	0	0	0
3178	Hnrnpa1	0	0	0	0	0	0	1	0	0	0	0	1	0	0	0	0	0	0	0	0	0	0	0	0	0	0	0	0	0
29920	Pycr2	0	0	0	1	0	0	0	0	0	0	0	0	0	0	0	0	0	0	0	0	0	0	0	0	0	0	0	0	0
55220	Klhdc8a	0	0	0	0	0	0	0	1	0	0	0	0	0	0	0	0	0	0	0	0	0	0	0	0	0	0	0	0	0
72	Actg2	0	1	0	0	0	0	0	0	0	0	0	0	0	0	0	0	0	0	0	0	0	0	0	0	0	0	0	1	0
79568	Maip1	0	0	1	0	0	0	0	0	0	0	0	0	0	0	0	0	0	0	0	0	0	0	0	0	0	0	0	0	0
10587	Txnrd2	0	1	0	0	0	0	0	0	0	0	0	0	0	0	1	0	0	0	0	0	0	0	0	0	0	0	0	0	0
90317	Zfp979;Zfp268	0	0	0	0	0	0	0	1	0	0	0	0	0	0	0	0	0	0	0	0	0	0	0	0	0	0	0	0	0
94241	Trp53inp1	0	0	0	1	0	0	0	0	0	0	0	0	0	0	0	0	0	0	0	0	0	0	0	0	0	0	0	0	0
55651	Nhp2	0	0	0	1	0	0	0	0	0	0	0	0	0	0	0	0	0	0	0	0	0	0	0	0	0	0	0	0	0
23517	Mtrex	0	0	0	0	1	0	0	0	0	0	0	0	0	0	0	0	0	0	0	0	0	0	0	0	0	0	0	0	0
8801	Suclg2	1	0	0	0	0	0	0	0	0	0	0	0	0	0	0	0	0	0	0	0	0	0	0	0	0	0	0	0	0
2690	Ghr	0	0	0	0	0	0	0	1	0	0	0	0	0	0	0	0	0	0	0	1	0	0	0	0	0	0	0	0	0
148229	Atp8b3	0	0	0	0	0	0	0	1	0	0	0	0	0	0	0	0	0	0	0	0	0	0	0	0	0	0	0	0	0
5128	Cdk17	0	0	0	1	0	0	0	0	0	0	0	0	0	0	0	0	0	0	0	0	0	0	0	0	0	0	0	0	0
2182	Acsl4	0	0	1	0	0	0	0	0	0	0	0	0	0	0	0	0	0	1	0	0	0	0	0	0	0	0	0	0	0
6251	Rsu1	0	1	0	0	0	0	0	0	0	0	0	0	0	0	0	0	0	0	0	0	0	0	0	0	0	0	0	0	0
84698	Caps2	0	1	0	0	0	0	0	0	0	0	0	0	0	0	0	0	0	0	0	0	0	0	0	0	0	0	0	0	0
283871	Pgp	0	0	0	1	0	0	0	0	0	0	0	0	0	0	0	0	1	0	0	0	0	0	0	0	0	0	0	0	0
83932	Sprtn	0	1	0	0	0	0	0	0	0	0	0	0	0	0	0	0	0	0	0	0	0	0	0	0	0	0	0	0	0
9411	Arhgap29	0	0	0	0	0	1	0	0	0	0	0	0	1	0	0	0	0	0	0	0	0	0	0	0	0	0	0	0	0
9584	Rbm39	0	0	0	0	0	0	1	0	0	0	0	0	0	0	0	0	0	0	0	0	0	0	0	0	0	0	0	0	0
440026	Tmem41b	0	0	0	1	0	0	0	0	0	0	0	0	0	0	0	0	0	0	0	0	0	0	0	0	0	0	0	0	0
145553	Mdp1	0	0	0	1	0	0	0	0	0	0	0	0	0	0	0	0	0	0	0	0	0	0	0	0	0	0	0	0	0
6282	S100a11	0	0	0	1	0	0	0	0	0	0	0	0	0	0	0	1	0	0	0	0	0	0	0	0	0	0	0	0	0
1760	Dmpk	0	1	0	0	0	0	0	0	0	0	0	0	0	0	0	0	0	0	0	0	0	0	0	0	0	0	0	1	0
93550	Zfand4	0	1	0	0	0	0	0	0	0	0	0	0	0	0	0	0	0	0	0	0	0	0	0	0	0	0	0	0	0
155006	Tmem213	0	0	0	0	0	0	0	1	0	0	0	0	0	0	0	0	0	0	0	0	0	0	0	0	0	0	0	0	0
9555	Macroh2a1	0	0	1	0	0	0	0	0	0	0	0	0	0	0	0	0	0	0	0	0	0	0	0	0	0	0	0	0	0
9725	Tmem63a	0	1	0	0	0	0	0	0	0	0	0	0	0	0	0	1	0	0	0	0	0	0	0	0	0	0	0	0	0
1263	Plk3	0	0	0	0	0	1	0	0	0	0	0	0	0	0	0	0	0	0	0	0	0	0	0	0	0	0	0	0	0
402778	Ifitm10	0	1	0	0	0	0	0	0	0	0	0	0	0	0	0	0	0	0	0	0	0	0	0	0	0	0	0	0	0
23138	N4bp3	0	1	0	0	0	0	0	0	0	0	0	0	0	0	0	0	0	0	0	0	0	0	0	0	0	0	0	0	0
84557	Map1lc3a	0	1	0	0	0	0	0	0	0	0	0	0	0	0	0	0	0	0	0	0	0	0	0	0	0	0	0	0	0
124402	Ubald1	0	1	0	0	0	0	0	0	0	0	0	0	0	0	0	0	0	0	0	0	0	0	0	0	0	0	0	0	0
1942	Efna1	0	1	0	0	0	0	0	0	0	0	1	0	0	0	0	0	0	0	0	0	0	0	0	0	0	0	0	0	0
23387	Sik3	0	0	0	0	1	0	0	0	0	0	0	0	0	0	0	0	0	0	0	0	0	0	0	0	0	0	0	0	0
8459	Tpst2	0	0	0	0	0	0	0	1	0	0	0	0	0	0	0	0	0	0	0	0	0	0	0	0	0	0	0	0	0
6038	Rnase4	0	0	0	1	0	0	0	0	0	0	0	0	0	0	0	0	0	0	0	0	0	0	0	0	0	0	0	0	0
100996492	Gm2115	0	0	0	0	0	0	0	1	0	0	0	0	0	0	0	0	0	0	0	0	0	0	0	0	0	0	0	0	0
1019	Cdk4	1	0	0	0	0	0	0	0	0	0	0	0	0	0	1	0	0	0	0	0	0	0	0	0	0	0	0	0	0
6996	Tdg	0	1	0	0	0	0	0	0	0	0	0	0	0	0	0	0	0	0	0	0	0	0	0	0	0	0	0	0	0
55163	Pnpo	0	0	0	1	0	0	0	0	0	0	0	0	0	0	0	0	0	0	0	0	0	0	0	0	0	0	0	0	0
6520	Slc3a2	0	0	1	0	0	0	0	0	0	0	0	0	0	1	0	0	0	0	0	0	0	0	0	0	0	0	0	0	0
56477	Ccl28	0	0	0	0	0	0	0	1	0	0	0	0	0	0	0	0	0	0	0	0	0	0	0	0	0	0	0	0	0
154043	Cnksr3	0	1	0	0	0	0	0	0	0	0	0	0	0	0	0	0	0	0	0	0	0	0	0	0	0	0	0	0	0
643338	Gm14137	0	0	0	1	0	0	0	0	0	0	0	0	0	0	0	0	0	0	0	0	0	0	0	0	0	0	0	0	0
256472	Tmem151a	0	0	0	1	0	0	0	0	0	0	0	0	0	0	0	0	0	0	0	0	0	0	0	0	0	0	0	0	0
107	Adcy1	0	0	0	0	0	0	0	1	0	0	0	0	0	0	0	0	0	0	0	0	0	0	0	0	0	0	1	0	0
23780	Apol8	0	0	0	1	0	0	0	0	0	0	0	0	0	0	0	0	0	0	0	0	0	0	0	0	0	0	0	0	0
114801	Tmem200a	0	0	0	0	0	0	0	1	0	0	0	0	0	0	0	0	0	0	0	0	0	0	0	0	0	0	0	0	0
5608	Map2k6	0	0	0	1	0	0	0	0	0	0	0	0	0	0	1	0	0	0	0	1	0	0	0	0	0	0	0	0	0
4488	Msx2	0	1	0	0	0	0	0	0	0	0	0	0	0	0	0	0	0	0	0	0	0	0	0	0	0	0	0	0	0
134285	Tmem171	0	0	0	1	0	0	0	0	0	0	0	0	0	0	0	0	0	0	0	0	0	0	0	0	0	0	0	0	0
1836	Slc26a2	0	0	0	1	0	0	0	0	0	0	0	0	0	0	0	0	1	0	0	0	0	0	0	0	0	0	0	0	0
4794	Nfkbie	0	0	0	1	0	0	0	0	0	0	0	0	0	0	0	0	0	0	0	0	0	0	0	0	0	0	0	0	0
117247	Slc16a10	0	1	0	0	0	0	0	0	0	0	0	0	0	0	0	0	0	0	0	0	0	0	0	0	0	0	0	0	0
100128731	Ost4	0	1	0	0	0	0	0	0	0	0	0	0	0	0	0	0	0	0	0	0	0	0	0	0	0	0	0	0	0
117246	Ftsj3	1	0	0	0	0	0	0	0	0	0	0	0	0	0	0	0	0	0	0	0	0	0	0	0	0	0	0	0	0
22801	Itga11	0	0	0	1	0	0	0	0	1	0	0	0	0	0	0	0	0	0	1	0	0	0	0	0	0	0	0	0	0
25874	Mpc2	0	1	0	0	0	0	0	0	0	0	0	0	0	0	0	0	0	0	0	0	0	0	0	0	0	0	0	0	0
52	Acp1	0	0	0	0	0	0	1	0	0	0	0	0	0	0	0	0	0	0	0	0	0	0	0	0	0	0	0	0	0
10614	Hexim1	0	0	0	0	0	0	1	0	0	0	0	0	0	0	0	0	0	0	0	0	0	0	0	0	0	0	0	0	0
56975	Fam20c	0	0	0	0	0	0	0	1	0	0	0	0	0	0	0	0	0	0	0	0	0	0	1	0	0	0	0	0	0
9169	Scaf11	0	0	1	0	0	0	0	0	0	0	0	0	0	0	0	0	0	0	0	0	0	0	0	0	0	0	0	0	0
79784	Myh14	0	1	0	0	0	0	0	0	0	0	1	0	1	0	0	0	0	0	0	0	0	0	0	0	0	0	0	0	0
4131	Map1b	0	0	1	0	0	0	0	0	0	0	0	0	0	0	0	0	0	0	0	0	0	0	0	0	0	0	0	0	0
912	Cd1d1	0	1	0	0	0	0	0	0	0	0	0	0	0	0	0	0	0	0	0	0	0	0	0	0	0	0	0	0	0
51434	Anapc7	0	0	0	0	0	0	1	0	0	0	0	0	0	0	1	0	0	0	0	0	0	0	0	0	0	0	0	0	0
2591	Galnt3	0	1	0	0	0	0	0	0	0	0	0	1	0	0	0	0	0	0	0	0	0	0	0	0	0	0	0	0	0
129138	Ankrd54	0	0	0	0	0	0	0	1	0	0	0	0	0	0	0	0	0	0	0	0	0	0	0	0	0	0	0	0	0
8454	Cul1	0	0	1	0	0	0	0	0	0	0	0	0	0	0	1	0	0	0	0	1	0	0	0	0	0	0	1	0	0
149345	Shisa4	0	1	0	0	0	0	0	0	0	0	0	0	0	0	0	0	0	0	0	0	0	0	0	0	0	0	0	0	0
652	Bmp4	0	0	0	1	0	0	0	0	1	0	0	0	0	0	0	0	0	0	0	0	0	1	1	0	0	0	0	0	0
8425	Ltbp4	0	0	0	0	0	0	0	1	1	0	0	0	0	0	0	0	0	0	0	0	0	1	0	0	0	0	0	0	0
9967	Thrap3	0	0	1	0	0	0	0	0	0	0	0	0	0	0	0	0	0	1	0	0	0	0	0	0	0	0	0	0	0
55217	Tmlhe	1	0	0	0	0	0	0	0	0	1	0	0	0	0	0	0	0	0	0	0	0	0	0	0	0	0	0	0	0
7482	Wnt2b	0	1	0	0	0	0	0	0	0	0	0	0	0	0	0	0	0	0	0	0	0	0	0	0	0	0	0	0	0
10782	Zfp110	0	1	0	0	0	0	0	0	0	0	0	0	0	0	0	0	0	0	0	0	0	0	0	0	0	0	0	0	0
56155	Tex14	0	0	0	1	0	0	0	0	0	0	0	0	0	0	0	0	0	0	0	0	0	0	0	0	0	0	0	0	0
47	Acly	0	0	0	1	0	0	0	0	0	0	0	0	0	0	0	1	0	1	0	0	0	0	0	0	0	0	0	0	0
10101	Nubp2	0	0	0	1	0	0	0	0	0	0	0	0	0	0	0	0	0	0	0	0	0	0	0	0	0	0	0	0	0
9929	Josd1	0	0	0	0	0	0	0	1	0	0	0	0	0	0	0	0	0	0	0	0	0	0	0	0	0	0	0	0	0
6210	Rps15a	1	0	0	0	0	0	0	0	0	1	1	0	0	0	1	0	0	0	0	0	0	0	0	0	0	0	0	0	0
5341	Plek	0	1	0	0	0	0	0	0	0	0	0	0	0	1	0	0	0	0	0	0	0	0	0	0	0	0	0	0	0
29945	Anapc4	0	0	1	0	0	0	0	0	0	0	0	0	0	0	1	0	0	0	0	0	0	0	0	0	0	0	0	0	0
144110	Tmem86a	0	0	0	1	0	0	0	0	0	0	0	0	0	0	0	0	0	0	0	0	0	0	0	0	0	0	0	0	0
2058	Eprs1	1	0	0	0	0	0	0	0	0	1	0	0	0	0	0	0	0	0	0	0	0	0	0	0	0	0	0	0	0
6307	Msmo1	0	0	0	1	0	0	0	0	0	0	0	0	0	0	0	0	0	1	0	0	0	0	0	0	0	1	0	0	0
35	Acads	0	0	0	0	1	0	0	0	0	0	0	0	0	0	0	0	0	1	0	0	0	0	0	0	0	0	0	0	0
3796	Kif2a	1	0	0	0	0	0	0	0	0	0	0	0	1	1	0	0	0	0	0	0	1	0	0	0	0	0	0	0	0
201299	Rdm1	0	0	0	1	0	0	0	0	0	0	0	0	0	0	0	0	0	0	0	0	0	0	0	0	0	0	0	0	0
25854	Fam149a	0	0	0	0	0	1	0	0	0	0	0	0	0	0	0	0	0	0	0	0	0	0	0	0	0	0	0	0	0
8076	Mfap5	0	1	0	0	0	0	0	0	1	0	0	0	0	0	0	0	0	0	0	0	0	1	0	0	0	0	0	0	0
10605	Paip1	0	0	0	0	0	0	1	0	0	0	0	0	0	0	0	0	0	0	0	0	0	0	0	0	0	0	0	0	0
8034	Slc25a16	0	1	0	0	0	0	0	0	0	0	0	0	0	0	0	0	0	0	0	0	0	0	0	0	0	0	0	0	0
23549	Dnpep	0	0	0	0	0	0	1	0	0	0	0	0	0	0	0	0	0	0	0	0	0	0	0	0	0	0	0	0	0
79071	Elovl6	0	0	0	1	0	0	0	0	0	0	0	0	0	0	0	0	0	1	0	0	0	0	0	0	0	1	0	0	0
1600	Dab1	0	0	0	0	0	0	0	1	0	0	1	0	0	0	0	0	0	0	0	0	0	0	0	0	0	0	0	0	0
11258	Dctn3	0	0	0	0	1	0	0	0	0	0	0	0	0	0	1	0	0	0	0	0	1	0	0	0	0	0	0	0	0
78992	Yipf2	0	1	0	0	0	0	0	0	0	0	0	0	0	0	0	0	0	0	0	0	0	0	0	0	0	0	0	0	0
124872	B4galnt2	0	1	0	0	0	0	0	0	0	0	0	0	0	0	0	0	1	0	0	0	0	0	0	0	0	0	0	0	0
2960	Gtf2e1	0	0	0	0	0	0	1	0	0	0	0	0	0	0	0	0	0	0	0	0	0	0	0	0	0	0	0	0	0
1454	Csnk1e	0	0	0	0	0	0	0	1	0	0	0	0	0	0	0	0	0	0	0	0	0	0	0	0	0	0	0	0	0
7371	Uck2	0	0	0	1	0	0	0	0	0	0	0	0	0	0	0	0	0	0	0	0	0	0	0	0	0	0	0	0	0
8883	Nae1	0	0	0	0	1	0	0	0	0	0	0	0	0	0	0	0	0	0	0	0	0	0	0	0	0	0	0	0	0
23256	Scfd1	0	0	1	0	0	0	0	0	0	0	0	0	1	0	0	0	0	0	0	0	1	0	0	0	0	0	0	0	0
255743	Npnt	0	1	0	0	0	0	0	0	0	0	0	0	0	0	0	0	0	0	0	0	0	0	0	0	0	0	0	0	0
79070	Poglut2	0	0	0	0	1	0	0	0	0	0	0	0	0	0	0	0	0	0	0	0	0	0	0	0	0	0	0	0	0
23007	Plch1	0	0	0	0	0	0	0	1	0	0	0	0	0	0	0	0	0	0	0	0	0	0	0	0	0	0	0	0	0
6652	Sord	0	0	1	0	0	0	0	0	0	0	0	0	0	0	0	0	1	0	0	0	0	0	0	0	0	0	0	0	0
2280	Fkbp1a	0	0	0	1	0	0	0	0	0	0	0	0	0	0	0	0	0	0	0	0	0	0	0	0	0	0	1	0	0
90627	Stard13	0	0	0	0	0	0	0	1	0	0	0	0	1	0	0	0	0	0	0	0	0	0	0	0	0	0	0	0	0
8808	Il1rl2	0	0	0	0	0	0	0	1	0	0	0	0	0	0	0	0	0	0	0	1	0	0	0	0	0	0	0	0	0
483	Atp1b3	0	0	0	0	1	0	0	0	0	0	0	0	0	1	0	0	0	0	0	0	0	0	0	0	0	0	0	1	0
4610	Mycl	0	0	0	1	0	0	0	0	0	0	0	0	0	0	0	0	0	0	0	0	0	0	0	0	0	0	0	0	0
7043	Tgfb3	0	1	0	0	0	0	0	0	1	0	0	0	0	1	0	0	0	0	1	0	0	1	0	0	0	0	0	0	0
9267	Cyth1	0	0	0	0	0	0	0	1	0	0	0	0	0	0	0	0	0	0	0	0	1	0	0	0	0	0	0	0	0
64781	Cerk	0	0	0	0	0	0	0	1	0	0	0	0	0	0	0	0	0	1	0	0	0	0	0	0	0	0	0	0	0
7086	Tkt	0	0	0	0	0	0	1	0	0	0	0	0	0	0	0	0	1	0	0	0	0	0	0	0	0	0	0	0	0
4869	Npm1	0	0	0	0	0	0	1	0	0	0	0	0	0	0	0	0	0	0	0	0	0	0	0	0	0	0	1	0	0
6728	Srp19	1	0	0	0	0	0	0	0	0	1	0	0	0	0	0	0	0	0	0	0	0	0	0	0	0	0	0	0	0
5071	Prkn	0	0	0	0	0	0	0	1	0	0	0	0	0	0	0	0	0	0	0	0	0	0	0	0	0	0	0	0	0
64834	Elovl1	0	0	0	0	0	1	0	0	0	0	0	0	0	0	0	0	0	1	0	0	0	0	0	0	0	0	0	0	0
92703	Tmem183a	0	0	0	1	0	0	0	0	0	0	0	0	0	0	0	0	0	0	0	0	0	0	0	0	0	0	0	0	0
115	Adcy9	0	0	0	1	0	0	0	0	0	0	0	0	0	0	0	0	0	0	0	0	0	0	0	0	0	0	1	0	0
5499	Ppp1ca	1	0	0	0	0	0	0	0	0	0	0	0	0	0	0	0	0	1	0	0	0	0	0	0	0	0	0	0	0
283659	Prtg	0	0	0	0	0	0	0	1	0	0	0	0	0	0	0	0	0	0	0	0	0	0	0	0	0	0	0	0	0
286097	Micu3	0	0	0	0	0	0	0	1	0	0	0	0	0	0	0	0	0	0	0	0	0	0	0	0	0	0	0	0	0
79414	Lrfn3	0	1	0	0	0	0	0	0	0	0	0	0	0	0	0	0	0	0	0	0	0	0	0	0	0	0	0	0	0
330	Birc3	0	0	0	0	0	0	0	1	0	0	0	0	0	0	0	0	0	0	0	1	0	0	0	0	0	0	0	0	0
7402	Utrn	1	0	0	0	0	0	0	0	0	0	1	0	0	0	0	0	0	0	0	0	0	0	0	0	0	0	0	0	0
26140	Ttll3	0	0	0	0	0	0	0	1	0	0	0	0	0	0	0	0	0	0	0	0	0	0	0	0	0	0	0	0	0
123169	Leo1	0	0	0	1	0	0	0	0	0	0	0	0	0	0	0	0	0	0	0	0	0	0	0	0	0	0	0	0	0
8518	Elp1	0	0	0	0	0	0	1	0	0	0	0	0	0	0	0	0	0	0	0	0	0	0	0	0	0	0	0	0	0
27314	Rab30	0	0	0	1	0	0	0	0	0	0	0	0	0	0	0	0	0	0	0	0	1	0	0	0	0	0	0	0	0
3797	Kif3c	0	1	0	0	0	0	0	0	0	0	0	0	0	1	0	0	0	0	0	0	1	0	0	0	0	0	0	0	0
805	Calm2	0	0	0	1	0	0	0	0	0	0	0	1	1	1	0	0	1	0	0	0	1	0	0	0	0	0	1	1	0
2821	Gpi	0	0	0	0	1	0	0	0	0	0	0	0	0	0	0	1	1	0	0	0	0	0	0	0	0	0	0	0	0
5002	Slc22a18	0	0	0	1	0	0	0	0	0	0	0	0	0	0	0	0	0	0	0	0	0	0	0	0	0	0	0	0	0
1371	Cpox	0	0	0	0	1	0	0	0	0	0	0	0	0	0	0	0	0	0	0	0	0	0	0	0	0	0	0	0	0
55140	Elp3	0	0	0	0	1	0	0	0	0	0	0	0	0	0	0	0	0	0	0	0	0	0	0	0	0	0	0	0	0
8398	Pla2g6	0	0	0	0	0	0	0	1	0	0	0	0	0	0	0	0	0	1	0	0	1	0	0	0	0	0	0	0	0
836	Casp3	0	0	0	0	1	0	0	0	1	0	0	0	0	0	0	0	0	0	0	1	0	0	0	0	0	0	0	0	0
492311	Igip	0	0	0	1	0	0	0	0	0	0	0	0	0	0	0	0	0	0	0	0	0	0	0	0	0	0	0	0	0
3959	Lgals3bp	0	0	0	0	0	0	0	1	0	0	0	0	0	1	0	0	0	0	0	0	0	0	0	0	0	0	0	0	0
4172	Mcm3	0	0	0	0	0	0	1	0	0	0	0	0	0	0	0	0	0	0	0	0	0	0	0	0	0	0	0	0	0
152579	Scfd2	0	0	0	0	0	0	0	1	0	0	0	0	0	0	0	0	0	0	0	0	0	0	0	0	0	0	0	0	0
1380	Cr2	0	1	0	0	0	0	0	0	0	0	0	0	0	0	0	0	0	0	0	0	0	0	0	0	0	0	0	0	0
79629	Ocel1	0	0	0	1	0	0	0	0	0	0	0	0	0	0	0	0	0	0	0	0	0	0	0	0	0	0	0	0	0
54903	Mks1	0	0	0	0	0	0	0	1	0	0	0	0	0	0	0	0	0	0	0	0	0	0	0	0	0	0	0	0	0
398	Arhgdig	0	1	0	0	0	0	0	0	0	0	0	0	1	0	0	0	0	0	0	0	0	0	0	0	0	0	0	0	0
2043	Epha4	0	0	0	0	0	1	0	0	0	0	1	0	0	0	0	0	0	0	0	0	0	0	0	0	0	0	0	0	0
54585	Lztfl1	0	1	0	0	0	0	0	0	0	0	0	0	0	0	0	0	0	0	0	0	0	0	0	0	0	0	0	0	0
9429	Abcg2	0	0	0	1	0	0	0	0	0	0	0	0	0	0	0	0	0	0	0	0	0	0	0	0	0	0	0	0	0
25829	Tmem184b	0	0	0	0	0	0	0	1	0	0	0	0	0	0	0	0	0	0	0	0	0	0	0	0	0	0	0	0	0
54629	Mindy2	0	0	0	1	0	0	0	0	0	0	0	0	0	0	0	0	0	0	0	0	0	0	0	0	0	0	0	0	0
51337	Them6	0	0	0	0	0	0	0	1	0	0	0	0	0	0	0	0	0	0	0	0	0	0	0	0	0	0	0	0	0
25797	Qpct	0	0	0	1	0	0	0	0	0	0	0	0	0	0	0	1	0	0	0	0	0	0	0	0	0	0	0	0	0
26010	Spats2l	0	1	0	0	0	0	0	0	0	0	0	0	0	0	0	0	0	0	0	0	0	0	0	0	0	0	0	0	0
133686	Nadk2	0	0	0	0	0	0	1	0	0	0	0	0	0	0	0	0	0	0	0	0	0	0	0	0	0	0	0	0	0
163259	Dennd2c	0	0	0	0	0	0	0	1	0	0	0	0	0	0	0	0	0	0	0	0	1	0	0	0	0	0	0	0	0
8078	Usp5	1	0	0	0	0	0	0	0	0	0	0	0	0	0	0	0	0	0	0	0	0	0	0	0	0	0	0	0	0
55809	Trerf1	0	0	0	0	0	0	0	1	0	0	0	0	0	0	0	0	0	0	0	0	0	0	0	0	0	0	0	0	0
389558	Fam180a	0	0	0	1	0	0	0	0	0	0	0	0	0	0	0	0	0	0	0	0	0	0	0	0	0	0	0	0	0
255027	Mpv17l	0	1	0	0	0	0	0	0	0	0	0	0	0	0	0	0	0	0	0	0	0	0	0	0	0	0	0	0	0
[truncated: 1,140 more rows]

## Sheet: Top20 Enrichment
GroupID	Category	Term	Description	LogP	Log(q-value)	InTerm_InList	Genes	Symbols
1_Summary	Reactome Gene Sets	R-HSA-1474244	Extracellular matrix organization	-51.7352	-48.3404	135/301	87,633,649,652,682,726,824,826,827,831,836,871,1277,1278,1280,1281,1282,1284,1288,1289,1290,1291,1292,1293,1294,1302,1303,1307,1308,1462,1509,1515,1634,1756,1758,2192,2199,2200,2201,2247,2331,2335,3339,3371,3655,3672,3675,3678,3679,3680,3685,3688,3689,3690,3693,3695,3696,3909,3910,3911,3912,3915,4015,4038,4052,4053,4054,4236,4313,4314,4318,4320,4325,4327,4684,4811,5033,5034,5054,5118,5154,5155,53…	ACTN1,BGN,BMP1,BMP4,BSG,CAPN5,CAPN2,CAPNS1,CAPN6,CAST,CASP3,SERPINH1,COL1A1,COL1A2,COL2A1,COL3A1,COL4A1,COL4A2,COL4A6,COL5A1,COL5A2,COL6A1,COL6A2,COL6A3,COL7A1,COL11A2,COL12A1,COL16A1,COL17A1,VCAN,CTSD,CTSV,DCN,DMD,DMP1,FBLN1,FBLN2,FBN1,FBN2,FGF2,FMOD,FN1,HSPG2,TNC,ITGA6,ITGA1,ITGA3,ITGA5,ITGA7,ITGA9,ITGAV,ITGB1,ITGB2,ITGB3,ITGB5,ITGB7,ITGB8,LAMA3,LAMA4,LAMA5,LAMB1,LAMC1,LOX,LRP4,LTBP1,LTBP2,LTBP…
1_Member	Reactome Gene Sets	R-HSA-1474244	Extracellular matrix organization	-51.7352	-48.3404	135/301	87,633,649,652,682,726,824,826,827,831,836,871,1277,1278,1280,1281,1282,1284,1288,1289,1290,1291,1292,1293,1294,1302,1303,1307,1308,1462,1509,1515,1634,1756,1758,2192,2199,2200,2201,2247,2331,2335,3339,3371,3655,3672,3675,3678,3679,3680,3685,3688,3689,3690,3693,3695,3696,3909,3910,3911,3912,3915,4015,4038,4052,4053,4054,4236,4313,4314,4318,4320,4325,4327,4684,4811,5033,5034,5054,5118,5154,5155,53…	ACTN1,BGN,BMP1,BMP4,BSG,CAPN5,CAPN2,CAPNS1,CAPN6,CAST,CASP3,SERPINH1,COL1A1,COL1A2,COL2A1,COL3A1,COL4A1,COL4A2,COL4A6,COL5A1,COL5A2,COL6A1,COL6A2,COL6A3,COL7A1,COL11A2,COL12A1,COL16A1,COL17A1,VCAN,CTSD,CTSV,DCN,DMD,DMP1,FBLN1,FBLN2,FBN1,FBN2,FGF2,FMOD,FN1,HSPG2,TNC,ITGA6,ITGA1,ITGA3,ITGA5,ITGA7,ITGA9,ITGAV,ITGB1,ITGB2,ITGB3,ITGB5,ITGB7,ITGB8,LAMA3,LAMA4,LAMA5,LAMB1,LAMC1,LOX,LRP4,LTBP1,LTBP2,LTBP…
1_Member	Reactome Gene Sets	R-HSA-1474290	Collagen formation	-24.9332	-22.5798	50/90	649,871,1277,1278,1280,1281,1282,1284,1288,1289,1290,1291,1292,1293,1294,1302,1303,1307,1308,1515,3655,3909,4015,4314,4318,5033,5034,5118,5339,5351,5352,7373,7837,8974,8985,9509,10491,10536,26577,50509,55214,57642,64175,79709,80781,84171,84695,85301,140766,283208	BMP1,SERPINH1,COL1A1,COL1A2,COL2A1,COL3A1,COL4A1,COL4A2,COL4A6,COL5A1,COL5A2,COL6A1,COL6A2,COL6A3,COL7A1,COL11A2,COL12A1,COL16A1,COL17A1,CTSV,ITGA6,LAMA3,LOX,MMP3,MMP9,P4HA1,P4HB,PCOLCE,PLEC,PLOD1,PLOD2,COL14A1,PXDN,P4HA2,PLOD3,ADAMTS2,CRTAP,P3H3,PCOLCE2,COL5A3,P3H2,COL20A1,P3H1,COLGALT1,COL18A1,LOXL4,LOXL3,COL27A1,ADAMTS14,P4HA3
1_Member	Reactome Gene Sets	R-HSA-1650814	Collagen biosynthesis and modifying enzymes	-21.6908	-19.5264	40/67	649,871,1277,1278,1280,1281,1282,1284,1288,1289,1290,1291,1292,1293,1294,1302,1303,1307,1308,5033,5034,5118,5351,5352,7373,8974,8985,9509,10491,10536,26577,50509,55214,57642,64175,79709,80781,85301,140766,283208	BMP1,SERPINH1,COL1A1,COL1A2,COL2A1,COL3A1,COL4A1,COL4A2,COL4A6,COL5A1,COL5A2,COL6A1,COL6A2,COL6A3,COL7A1,COL11A2,COL12A1,COL16A1,COL17A1,P4HA1,P4HB,PCOLCE,PLOD1,PLOD2,COL14A1,P4HA2,PLOD3,ADAMTS2,CRTAP,P3H3,PCOLCE2,COL5A3,P3H2,COL20A1,P3H1,COLGALT1,COL18A1,COL27A1,ADAMTS14,P4HA3
1_Member	Reactome Gene Sets	R-HSA-1474228	Degradation of the extracellular matrix	-18.9062	-16.8731	56/140	649,682,726,824,826,827,831,836,1277,1278,1280,1281,1282,1284,1288,1289,1290,1291,1292,1293,1294,1302,1303,1307,1308,1509,1515,1634,2200,2201,2335,3339,3909,3911,3912,3915,4313,4314,4318,4320,4325,4327,4811,5644,6650,6696,7076,7373,9507,9510,11096,23385,50509,80781,170690,222663	BMP1,BSG,CAPN5,CAPN2,CAPNS1,CAPN6,CAST,CASP3,COL1A1,COL1A2,COL2A1,COL3A1,COL4A1,COL4A2,COL4A6,COL5A1,COL5A2,COL6A1,COL6A2,COL6A3,COL7A1,COL11A2,COL12A1,COL16A1,COL17A1,CTSD,CTSV,DCN,FBN1,FBN2,FN1,HSPG2,LAMA3,LAMA5,LAMB1,LAMC1,MMP2,MMP3,MMP9,MMP11,MMP16,MMP19,NID1,PRSS1,CAPN15,SPP1,TIMP1,COL14A1,ADAMTS4,ADAMTS1,ADAMTS5,NCSTN,COL5A3,COL18A1,ADAMTS16,SCUBE3
1_Member	Reactome Gene Sets	R-HSA-2022090	Assembly of collagen fibrils and other multimeric structures	-16.1252	-14.6054	23/61	649,1278,1281,1282,1284,1288,1289,1291,1292,1293,1294,1302,1303,3655,3909,4318,7373,7837,50509,80781,84171,84695,85301	BMP1,COL1A2,COL3A1,COL4A1,COL4A2,COL4A6,COL5A1,COL6A1,COL6A2,COL6A3,COL7A1,COL11A2,COL12A1,ITGA6,LAMA3,MMP9,COL14A1,PXDN,COL5A3,COL18A1,LOXL4,LOXL3,COL27A1
2_Summary	Reactome Gene Sets	R-HSA-8868773	rRNA processing in the nucleus and cytosol	-46.9412	-43.5464	56/194	1736,4691,4736,4839,5822,6133,6135,6139,6147,6152,6154,6158,6168,6187,6189,6191,6193,6194,6203,6204,6205,6207,6208,6209,6217,6218,6223,6228,6233,9136,9188,9349,9790,10199,10528,10607,10885,11224,22984,23160,23481,27042,27340,27341,51202,51388,51602,54881,55127,55226,55720,55813,57050,65083,84135,134430,1650,6132,6160,6164,6165,6184,6185,6210,6230,6728,6734,6745,23478,29927,58477,1974,3183,3303,49…	DKC1,NCL,RPL10A,NOP2,PWP2,RPL9,RPL11,RPL17,RPL23A,RPL24,RPL26,RPL28,RPL37A,RPS2,RPS3A,RPS4X,RPS5,RPS6,RPS9,RPS10,RPS11,RPS13,RPS14,RPS15,RPS16,RPS17,RPS19,RPS23,RPS27A,RRP9,DDX21,RPL23,BMS1,MPHOSPH10,NOP56,TBL3,WDR3,RPL35,PDCD11,WDR43,PES1,UTP25,UTP20,RRP7A,DDX47,NIP7,NOP58,TEX10,HEATR1,NAT10,TSR1,UTP6,UTP3,NOL6,UTP15,WDR36,DDOST,RPL8,RPL31,RPL34,RPL35A,RPN1,RPN2,RPS15A,RPS25,SRP19,SRPRA,SSR1,SEC…
2_Member	Reactome Gene Sets	R-HSA-8868773	rRNA processing in the nucleus and cytosol	-46.9412	-43.5464	56/194	1736,4691,4736,4839,5822,6133,6135,6139,6147,6152,6154,6158,6168,6187,6189,6191,6193,6194,6203,6204,6205,6207,6208,6209,6217,6218,6223,6228,6233,9136,9188,9349,9790,10199,10528,10607,10885,11224,22984,23160,23481,27042,27340,27341,51202,51388,51602,54881,55127,55226,55720,55813,57050,65083,84135,134430	DKC1,NCL,RPL10A,NOP2,PWP2,RPL9,RPL11,RPL17,RPL23A,RPL24,RPL26,RPL28,RPL37A,RPS2,RPS3A,RPS4X,RPS5,RPS6,RPS9,RPS10,RPS11,RPS13,RPS14,RPS15,RPS16,RPS17,RPS19,RPS23,RPS27A,RRP9,DDX21,RPL23,BMS1,MPHOSPH10,NOP56,TBL3,WDR3,RPL35,PDCD11,WDR43,PES1,UTP25,UTP20,RRP7A,DDX47,NIP7,NOP58,TEX10,HEATR1,NAT10,TSR1,UTP6,UTP3,NOL6,UTP15,WDR36
2_Member	Reactome Gene Sets	R-HSA-72312	rRNA processing	-45.5917	-42.4979	56/204	1736,4691,4736,4839,5822,6133,6135,6139,6147,6152,6154,6158,6168,6187,6189,6191,6193,6194,6203,6204,6205,6207,6208,6209,6217,6218,6223,6228,6233,9136,9188,9349,9790,10199,10528,10607,10885,11224,22984,23160,23481,27042,27340,27341,51202,51388,51602,54881,55127,55226,55720,55813,57050,65083,84135,134430	DKC1,NCL,RPL10A,NOP2,PWP2,RPL9,RPL11,RPL17,RPL23A,RPL24,RPL26,RPL28,RPL37A,RPS2,RPS3A,RPS4X,RPS5,RPS6,RPS9,RPS10,RPS11,RPS13,RPS14,RPS15,RPS16,RPS17,RPS19,RPS23,RPS27A,RRP9,DDX21,RPL23,BMS1,MPHOSPH10,NOP56,TBL3,WDR3,RPL35,PDCD11,WDR43,PES1,UTP25,UTP20,RRP7A,DDX47,NIP7,NOP58,TEX10,HEATR1,NAT10,TSR1,UTP6,UTP3,NOL6,UTP15,WDR36
2_Member	Reactome Gene Sets	R-HSA-6791226	Major pathway of rRNA processing in the nucleolus and cytosol	-44.3676	-41.4499	53/184	4691,4736,5822,6133,6135,6139,6147,6152,6154,6158,6168,6187,6189,6191,6193,6194,6203,6204,6205,6207,6208,6209,6217,6218,6223,6228,6233,9136,9188,9349,9790,10199,10528,10607,10885,11224,22984,23160,23481,27042,27340,27341,51202,51388,51602,54881,55127,55720,55813,57050,65083,84135,134430	NCL,RPL10A,PWP2,RPL9,RPL11,RPL17,RPL23A,RPL24,RPL26,RPL28,RPL37A,RPS2,RPS3A,RPS4X,RPS5,RPS6,RPS9,RPS10,RPS11,RPS13,RPS14,RPS15,RPS16,RPS17,RPS19,RPS23,RPS27A,RRP9,DDX21,RPL23,BMS1,MPHOSPH10,NOP56,TBL3,WDR3,RPL35,PDCD11,WDR43,PES1,UTP25,UTP20,RRP7A,DDX47,NIP7,NOP58,TEX10,HEATR1,TSR1,UTP6,UTP3,NOL6,UTP15,WDR36
2_Member	Reactome Gene Sets	R-HSA-1799339	SRP-dependent cotranslational protein targeting to membrane	-33.8833	-31.2666	37/112	1650,4736,6132,6133,6139,6147,6152,6154,6158,6160,6164,6165,6168,6184,6185,6189,6191,6193,6194,6203,6204,6207,6208,6209,6210,6217,6218,6228,6230,6728,6734,6745,9349,11224,23478,29927,58477	DDOST,RPL10A,RPL8,RPL9,RPL17,RPL23A,RPL24,RPL26,RPL28,RPL31,RPL34,RPL35A,RPL37A,RPN1,RPN2,RPS3A,RPS4X,RPS5,RPS6,RPS9,RPS10,RPS13,RPS14,RPS15,RPS15A,RPS16,RPS17,RPS23,RPS25,SRP19,SRPRA,SSR1,RPL23,RPL35,SEC11A,SEC61A1,SRPRB
2_Member	Reactome Gene Sets	R-HSA-8953854	Metabolism of RNA	-32.0422	-29.6474	75/673	1736,1974,3183,3303,4691,4736,4839,4928,5822,6133,6135,6139,6147,6152,6154,6158,6168,6187,6189,6191,6193,6194,6203,6204,6205,6207,6208,6209,6217,6218,6223,6228,6233,6628,9092,9128,9129,9136,9188,9349,9688,9790,10199,10250,10528,10607,10713,10885,10992,11100,11224,22984,23160,23481,27042,27340,27341,51202,51388,51602,54881,54888,55127,55226,55660,55720,55813,57050,57187,63892,65083,79691,80324,841…	DKC1,EIF4A2,HNRNPC,HSPA1A,NCL,RPL10A,NOP2,NUP98,PWP2,RPL9,RPL11,RPL17,RPL23A,RPL24,RPL26,RPL28,RPL37A,RPS2,RPS3A,RPS4X,RPS5,RPS6,RPS9,RPS10,RPS11,RPS13,RPS14,RPS15,RPS16,RPS17,RPS19,RPS23,RPS27A,SNRPB,SART1,PRPF4,PRPF3,RRP9,DDX21,RPL23,NUP93,BMS1,MPHOSPH10,SRRM1,NOP56,TBL3,USP39,WDR3,SF3B2,HNRNPUL1,RPL35,PDCD11,WDR43,PES1,UTP25,UTP20,RRP7A,DDX47,NIP7,NOP58,TEX10,NSUN2,HEATR1,NAT10,PRPF40A,TSR1,UT…
2_Member	Reactome Gene Sets	R-HSA-71291	Metabolism of amino acids and derivatives	-29.0917	-26.7761	54/374	36,586,1152,1491,1629,1728,1743,1892,2058,2184,2746,4357,4507,4736,5709,5720,6132,6133,6139,6147,6152,6154,6158,6160,6164,6165,6168,6189,6191,6193,6194,6203,6204,6207,6208,6209,6210,6217,6218,6228,6230,8140,9349,9380,10247,11112,11224,51074,51380,51520,55217,58472,84245,84706	ACADSB,BCAT1,CKB,CTH,DBT,NQO1,DLST,ECHS1,EPRS1,FAH,GLUD1,MPST,MTAP,RPL10A,PSMD3,PSME1,RPL8,RPL9,RPL17,RPL23A,RPL24,RPL26,RPL28,RPL31,RPL34,RPL35A,RPL37A,RPS3A,RPS4X,RPS5,RPS6,RPS9,RPS10,RPS13,RPS14,RPS15,RPS15A,RPS16,RPS17,RPS23,RPS25,SLC7A5,RPL23,GRHPR,RIDA,HIBADH,RPL35,APIP,CSAD,LARS1,TMLHE,SQOR,MRI1,GPT2
2_Member	Reactome Gene Sets	R-HSA-6790901	rRNA modification in the nucleus and cytosol	-28.7131	-26.4322	27/61	1736,4839,5822,6187,6194,6203,6208,9136,9790,10199,10528,10607,10885,22984,23160,27042,27340,27341,51202,51602,55127,55226,55813,57050,65083,84135,134430	DKC1,NOP2,PWP2,RPS2,RPS6,RPS9,RPS14,RRP9,BMS1,MPHOSPH10,NOP56,TBL3,WDR3,PDCD11,WDR43,UTP25,UTP20,RRP7A,DDX47,NOP58,HEATR1,NAT10,UTP6,UTP3,NOL6,UTP15,WDR36
2_Member	Reactome Gene Sets	R-HSA-72766	Translation	-27.1144	-24.8957	47/291	833,1650,1968,1974,4677,4736,5464,5917,6133,6135,6139,6147,6152,6154,6158,6168,6182,6184,6185,6187,6189,6191,6193,6194,6203,6204,6205,6207,6208,6209,6217,6218,6223,6228,6233,6734,6745,9349,11224,29093,29927,51520,57505,58477,80222,85476,219927	CARS1,DDOST,EIF2S3,EIF4A2,NARS1,RPL10A,PPA1,RARS1,RPL9,RPL11,RPL17,RPL23A,RPL24,RPL26,RPL28,RPL37A,MRPL12,RPN1,RPN2,RPS2,RPS3A,RPS4X,RPS5,RPS6,RPS9,RPS10,RPS11,RPS13,RPS14,RPS15,RPS16,RPS17,RPS19,RPS23,RPS27A,SRPRA,SSR1,RPL23,RPL35,MRPL22,SEC61A1,LARS1,AARS2,SRPRB,TARS2,GFM1,MRPL21
2_Member	Reactome Gene Sets	R-HSA-156902	Peptide chain elongation	-25.0775	-22.938	28/89	4736,6132,6133,6139,6147,6152,6154,6158,6160,6164,6165,6168,6189,6191,6193,6194,6203,6204,6207,6208,6209,6210,6217,6218,6228,6230,9349,11224	RPL10A,RPL8,RPL9,RPL17,RPL23A,RPL24,RPL26,RPL28,RPL31,RPL34,RPL35A,RPL37A,RPS3A,RPS4X,RPS5,RPS6,RPS9,RPS10,RPS13,RPS14,RPS15,RPS15A,RPS16,RPS17,RPS23,RPS25,RPL23,RPL35
2_Member	Reactome Gene Sets	R-HSA-192823	Viral mRNA Translation	-25.0775	-22.938	28/89	4736,6132,6133,6139,6147,6152,6154,6158,6160,6164,6165,6168,6189,6191,6193,6194,6203,6204,6207,6208,6209,6210,6217,6218,6228,6230,9349,11224	RPL10A,RPL8,RPL9,RPL17,RPL23A,RPL24,RPL26,RPL28,RPL31,RPL34,RPL35A,RPL37A,RPS3A,RPS4X,RPS5,RPS6,RPS9,RPS10,RPS13,RPS14,RPS15,RPS15A,RPS16,RPS17,RPS23,RPS25,RPL23,RPL35
2_Member	Reactome Gene Sets	R-HSA-2408522	Selenoamino acid metabolism	-25.0226	-22.9065	31/118	1491,2058,4736,6132,6133,6139,6147,6152,6154,6158,6160,6164,6165,6168,6189,6191,6193,6194,6203,6204,6207,6208,6209,6210,6217,6218,6228,6230,9349,11224,51520	CTH,EPRS1,RPL10A,RPL8,RPL9,RPL17,RPL23A,RPL24,RPL26,RPL28,RPL31,RPL34,RPL35A,RPL37A,RPS3A,RPS4X,RPS5,RPS6,RPS9,RPS10,RPS13,RPS14,RPS15,RPS15A,RPS16,RPS17,RPS23,RPS25,RPL23,RPL35,LARS1
2_Member	Reactome Gene Sets	R-HSA-9633012	Response of EIF2AK4 (GCN2) to amino acid deficiency	-24.6663	-22.5937	29/101	1968,4736,6132,6133,6139,6147,6152,6154,6158,6160,6164,6165,6168,6189,6191,6193,6194,6203,6204,6207,6208,6209,6210,6217,6218,6228,6230,9349,11224	EIF2S3,RPL10A,RPL8,RPL9,RPL17,RPL23A,RPL24,RPL26,RPL28,RPL31,RPL34,RPL35A,RPL37A,RPS3A,RPS4X,RPS5,RPS6,RPS9,RPS10,RPS13,RPS14,RPS15,RPS15A,RPS16,RPS17,RPS23,RPS25,RPL23,RPL35
2_Member	Reactome Gene Sets	R-HSA-156842	Eukaryotic Translation Elongation	-24.4758	-22.4943	28/93	4736,6132,6133,6139,6147,6152,6154,6158,6160,6164,6165,6168,6189,6191,6193,6194,6203,6204,6207,6208,6209,6210,6217,6218,6228,6230,9349,11224	RPL10A,RPL8,RPL9,RPL17,RPL23A,RPL24,RPL26,RPL28,RPL31,RPL34,RPL35A,RPL37A,RPS3A,RPS4X,RPS5,RPS6,RPS9,RPS10,RPS13,RPS14,RPS15,RPS15A,RPS16,RPS17,RPS23,RPS25,RPL23,RPL35
2_Member	Reactome Gene Sets	R-HSA-2408557	Selenocysteine synthesis	-24.4758	-22.4943	28/93	4736,6132,6133,6139,6147,6152,6154,6158,6160,6164,6165,6168,6189,6191,6193,6194,6203,6204,6207,6208,6209,6210,6217,6218,6228,6230,9349,11224	RPL10A,RPL8,RPL9,RPL17,RPL23A,RPL24,RPL26,RPL28,RPL31,RPL34,RPL35A,RPL37A,RPS3A,RPS4X,RPS5,RPS6,RPS9,RPS10,RPS13,RPS14,RPS15,RPS15A,RPS16,RPS17,RPS23,RPS25,RPL23,RPL35
2_Member	Reactome Gene Sets	R-HSA-72764	Eukaryotic Translation Termination	-24.4758	-22.4943	28/93	4736,6132,6133,6139,6147,6152,6154,6158,6160,6164,6165,6168,6189,6191,6193,6194,6203,6204,6207,6208,6209,6210,6217,6218,6228,6230,9349,11224	RPL10A,RPL8,RPL9,RPL17,RPL23A,RPL24,RPL26,RPL28,RPL31,RPL34,RPL35A,RPL37A,RPS3A,RPS4X,RPS5,RPS6,RPS9,RPS10,RPS13,RPS14,RPS15,RPS15A,RPS16,RPS17,RPS23,RPS25,RPL23,RPL35
2_Member	Reactome Gene Sets	R-HSA-9711097	Cellular response to starvation	-24.4742	-22.4943	34/156	523,526,529,1968,4736,6132,6133,6139,6147,6152,6154,6158,6160,6164,6165,6168,6189,6191,6193,6194,6203,6204,6207,6208,6209,6210,6217,6218,6228,6230,9114,9349,11224,64121	ATP6V1A,ATP6V1B2,ATP6V1E1,EIF2S3,RPL10A,RPL8,RPL9,RPL17,RPL23A,RPL24,RPL26,RPL28,RPL31,RPL34,RPL35A,RPL37A,RPS3A,RPS4X,RPS5,RPS6,RPS9,RPS10,RPS13,RPS14,RPS15,RPS15A,RPS16,RPS17,RPS23,RPS25,ATP6V0D1,RPL23,RPL35,RRAGC
2_Member	Reactome Gene Sets	R-HSA-975956	Nonsense Mediated Decay (NMD) independent of the Exon Junction Complex (EJC)	-24.187	-22.2394	28/95	4736,6132,6133,6139,6147,6152,6154,6158,6160,6164,6165,6168,6189,6191,6193,6194,6203,6204,6207,6208,6209,6210,6217,6218,6228,6230,9349,11224	RPL10A,RPL8,RPL9,RPL17,RPL23A,RPL24,RPL26,RPL28,RPL31,RPL34,RPL35A,RPL37A,RPS3A,RPS4X,RPS5,RPS6,RPS9,RPS10,RPS13,RPS14,RPS15,RPS15A,RPS16,RPS17,RPS23,RPS25,RPL23,RPL35
2_Member	Reactome Gene Sets	R-HSA-156827	L13a-mediated translational silencing of Ceruloplasmin expression	-23.3667	-21.5012	29/111	1968,4736,6132,6133,6139,6147,6152,6154,6158,6160,6164,6165,6168,6189,6191,6193,6194,6203,6204,6207,6208,6209,6210,6217,6218,6228,6230,9349,11224	EIF2S3,RPL10A,RPL8,RPL9,RPL17,RPL23A,RPL24,RPL26,RPL28,RPL31,RPL34,RPL35A,RPL37A,RPS3A,RPS4X,RPS5,RPS6,RPS9,RPS10,RPS13,RPS14,RPS15,RPS15A,RPS16,RPS17,RPS23,RPS25,RPL23,RPL35
2_Member	Reactome Gene Sets	R-HSA-72689	Formation of a pool of free 40S subunits	-23.3646	-21.5012	28/101	4736,6132,6133,6139,6147,6152,6154,6158,6160,6164,6165,6168,6189,6191,6193,6194,6203,6204,6207,6208,6209,6210,6217,6218,6228,6230,9349,11224	RPL10A,RPL8,RPL9,RPL17,RPL23A,RPL24,RPL26,RPL28,RPL31,RPL34,RPL35A,RPL37A,RPS3A,RPS4X,RPS5,RPS6,RPS9,RPS10,RPS13,RPS14,RPS15,RPS15A,RPS16,RPS17,RPS23,RPS25,RPL23,RPL35
2_Member	Reactome Gene Sets	R-HSA-72706	GTP hydrolysis and joining of the 60S ribosomal subunit	-23.2448	-21.3941	29/112	1968,4736,6132,6133,6139,6147,6152,6154,6158,6160,6164,6165,6168,6189,6191,6193,6194,6203,6204,6207,6208,6209,6210,6217,6218,6228,6230,9349,11224	EIF2S3,RPL10A,RPL8,RPL9,RPL17,RPL23A,RPL24,RPL26,RPL28,RPL31,RPL34,RPL35A,RPL37A,RPS3A,RPS4X,RPS5,RPS6,RPS9,RPS10,RPS13,RPS14,RPS15,RPS15A,RPS16,RPS17,RPS23,RPS25,RPL23,RPL35
2_Member	Reactome Gene Sets	R-HSA-72613	Eukaryotic Translation Initiation	-22.4275	-20.6662	29/119	1968,4736,6132,6133,6139,6147,6152,6154,6158,6160,6164,6165,6168,6189,6191,6193,6194,6203,6204,6207,6208,6209,6210,6217,6218,6228,6230,9349,11224	EIF2S3,RPL10A,RPL8,RPL9,RPL17,RPL23A,RPL24,RPL26,RPL28,RPL31,RPL34,RPL35A,RPL37A,RPS3A,RPS4X,RPS5,RPS6,RPS9,RPS10,RPS13,RPS14,RPS15,RPS15A,RPS16,RPS17,RPS23,RPS25,RPL23,RPL35
2_Member	Reactome Gene Sets	R-HSA-72737	Cap-dependent Translation Initiation	-22.4275	-20.6662	29/119	1968,4736,6132,6133,6139,6147,6152,6154,6158,6160,6164,6165,6168,6189,6191,6193,6194,6203,6204,6207,6208,6209,6210,6217,6218,6228,6230,9349,11224	EIF2S3,RPL10A,RPL8,RPL9,RPL17,RPL23A,RPL24,RPL26,RPL28,RPL31,RPL34,RPL35A,RPL37A,RPS3A,RPS4X,RPS5,RPS6,RPS9,RPS10,RPS13,RPS14,RPS15,RPS15A,RPS16,RPS17,RPS23,RPS25,RPL23,RPL35
2_Member	Reactome Gene Sets	R-HSA-168255	Influenza Infection	-22.1962	-20.4449	32/156	142,821,3303,3838,4736,6132,6133,6139,6147,6152,6154,6158,6160,6164,6165,6168,6189,6191,6193,6194,6203,6204,6207,6208,6209,6210,6217,6218,6228,6230,9349,11224	PARP1,CANX,HSPA1A,KPNA2,RPL10A,RPL8,RPL9,RPL17,RPL23A,RPL24,RPL26,RPL28,RPL31,RPL34,RPL35A,RPL37A,RPS3A,RPS4X,RPS5,RPS6,RPS9,RPS10,RPS13,RPS14,RPS15,RPS15A,RPS16,RPS17,RPS23,RPS25,RPL23,RPL35
2_Member	Reactome Gene Sets	R-HSA-927802	Nonsense-Mediated Decay (NMD)	-21.6616	-19.9657	28/115	4736,6132,6133,6139,6147,6152,6154,6158,6160,6164,6165,6168,6189,6191,6193,6194,6203,6204,6207,6208,6209,6210,6217,6218,6228,6230,9349,11224	RPL10A,RPL8,RPL9,RPL17,RPL23A,RPL24,RPL26,RPL28,RPL31,RPL34,RPL35A,RPL37A,RPS3A,RPS4X,RPS5,RPS6,RPS9,RPS10,RPS13,RPS14,RPS15,RPS15A,RPS16,RPS17,RPS23,RPS25,RPL23,RPL35
2_Member	Reactome Gene Sets	R-HSA-975957	Nonsense Mediated Decay (NMD) enhanced by the Exon Junction Complex (EJC)	-21.6616	-19.9657	28/115	4736,6132,6133,6139,6147,6152,6154,6158,6160,6164,6165,6168,6189,6191,6193,6194,6203,6204,6207,6208,6209,6210,6217,6218,6228,6230,9349,11224	RPL10A,RPL8,RPL9,RPL17,RPL23A,RPL24,RPL26,RPL28,RPL31,RPL34,RPL35A,RPL37A,RPS3A,RPS4X,RPS5,RPS6,RPS9,RPS10,RPS13,RPS14,RPS15,RPS15A,RPS16,RPS17,RPS23,RPS25,RPL23,RPL35
2_Member	Reactome Gene Sets	R-HSA-168273	Influenza Viral RNA Transcription and Replication	-21.6401	-19.9528	30/135	142,4736,4928,6133,6135,6139,6147,6152,6154,6158,6168,6187,6189,6191,6193,6194,6203,6204,6205,6207,6208,6209,6217,6218,6223,6228,6233,9349,9688,11224	PARP1,RPL10A,NUP98,RPL9,RPL11,RPL17,RPL23A,RPL24,RPL26,RPL28,RPL37A,RPS2,RPS3A,RPS4X,RPS5,RPS6,RPS9,RPS10,RPS11,RPS13,RPS14,RPS15,RPS16,RPS17,RPS19,RPS23,RPS27A,RPL23,NUP93,RPL35
2_Member	Reactome Gene Sets	R-HSA-9010553	Regulation of expression of SLITs and ROBOs	-18.7949	-17.1994	30/171	4736,5709,5720,6132,6133,6139,6147,6152,6154,6158,6160,6164,6165,6168,6189,6191,6193,6194,6203,6204,6207,6208,6209,6210,6217,6218,6228,6230,9349,11224	RPL10A,PSMD3,PSME1,RPL8,RPL9,RPL17,RPL23A,RPL24,RPL26,RPL28,RPL31,RPL34,RPL35A,RPL37A,RPS3A,RPS4X,RPS5,RPS6,RPS9,RPS10,RPS13,RPS14,RPS15,RPS15A,RPS16,RPS17,RPS23,RPS25,RPL23,RPL35
2_Member	Reactome Gene Sets	R-HSA-376176	Signaling by ROBO receptors	-17.6106	-16.0444	32/218	998,4736,5709,5720,5879,6132,6133,6139,6147,6152,6154,6158,6160,6164,6165,6168,6189,6191,6193,6194,6203,6204,6207,6208,6209,6210,6217,6218,6228,6230,9349,11224	CDC42,RPL10A,PSMD3,PSME1,RAC1,RPL8,RPL9,RPL17,RPL23A,RPL24,RPL26,RPL28,RPL31,RPL34,RPL35A,RPL37A,RPS3A,RPS4X,RPS5,RPS6,RPS9,RPS10,RPS13,RPS14,RPS15,RPS15A,RPS16,RPS17,RPS23,RPS25,RPL23,RPL35
2_Member	Reactome Gene Sets	R-HSA-72649	Translation initiation complex formation	-16.0396	-14.5313	18/58	1968,1974,6187,6189,6191,6193,6194,6203,6204,6205,6207,6208,6209,6217,6218,6223,6228,6233	EIF2S3,EIF4A2,RPS2,RPS3A,RPS4X,RPS5,RPS6,RPS9,RPS10,RPS11,RPS13,RPS14,RPS15,RPS16,RPS17,RPS19,RPS23,RPS27A
2_Member	Reactome Gene Sets	R-HSA-72702	Ribosomal scanning and start codon recognition	-16.0396	-14.5313	18/58	1968,1974,6187,6189,6191,6193,6194,6203,6204,6205,6207,6208,6209,6217,6218,6223,6228,6233	EIF2S3,EIF4A2,RPS2,RPS3A,RPS4X,RPS5,RPS6,RPS9,RPS10,RPS11,RPS13,RPS14,RPS15,RPS16,RPS17,RPS19,RPS23,RPS27A
2_Member	Reactome Gene Sets	R-HSA-72662	Activation of the mRNA upon binding of the cap-binding complex and eIFs, and subsequent binding to 43S	-15.89	-14.3983	18/59	1968,1974,6187,6189,6191,6193,6194,6203,6204,6205,6207,6208,6209,6217,6218,6223,6228,6233	EIF2S3,EIF4A2,RPS2,RPS3A,RPS4X,RPS5,RPS6,RPS9,RPS10,RPS11,RPS13,RPS14,RPS15,RPS16,RPS17,RPS19,RPS23,RPS27A
2_Member	Reactome Gene Sets	R-HSA-72695	Formation of the ternary complex, and subsequently, the 43S complex	-15.7798	-14.2988	17/51	1968,6187,6189,6191,6193,6194,6203,6204,6205,6207,6208,6209,6217,6218,6223,6228,6233	EIF2S3,RPS2,RPS3A,RPS4X,RPS5,RPS6,RPS9,RPS10,RPS11,RPS13,RPS14,RPS15,RPS16,RPS17,RPS19,RPS23,RPS27A
3_Summary	Reactome Gene Sets	R-HSA-9675108	Nervous system development	-37.9988	-34.905	174/577	60,161,163,214,286,288,388,775,782,998,1280,1281,1282,1284,1289,1290,1291,1292,1293,1595,1600,1741,1759,1785,1793,1808,1809,1942,2042,2043,2048,2051,2260,2668,2674,2887,2932,3066,3156,3326,3670,3672,3678,3680,3685,3688,3690,3786,3912,3915,4067,4116,4233,4313,4318,4478,4627,4628,4637,4651,4665,4684,4736,4753,4756,5058,5291,5295,5306,5567,5595,5600,5664,5686,5698,5707,5709,5720,5879,5979,6092,6132,…	ACTB,AP2A2,AP2B1,ALCAM,ANK1,ANK3,RHOB,CACNA1C,CACNB1,CDC42,COL2A1,COL3A1,COL4A1,COL4A2,COL5A1,COL5A2,COL6A1,COL6A2,COL6A3,CYP51A1,DAB1,DLG3,DNM1,DNM2,DOCK1,DPYSL2,DPYSL3,EFNA1,EPHA3,EPHA4,EPHB2,EPHB6,FGFR1,GDNF,GFRA1,GRB10,GSK3B,HDAC2,HMGCR,HSP90AB1,ISL1,ITGA1,ITGA5,ITGA9,ITGAV,ITGB1,ITGB3,KCNQ3,LAMB1,LAMC1,LYN,MAGOH,MET,MMP2,MMP9,MSN,MYH9,MYH10,MYL6,MYO10,NAB2,NCAM1,RPL10A,NELL2,NEO1,PAK1,PIK3CB…
3_Member	Reactome Gene Sets	R-HSA-9675108	Nervous system development	-37.9988	-34.905	174/577	60,161,163,214,286,288,388,775,782,998,1280,1281,1282,1284,1289,1290,1291,1292,1293,1595,1600,1741,1759,1785,1793,1808,1809,1942,2042,2043,2048,2051,2260,2668,2674,2887,2932,3066,3156,3326,3670,3672,3678,3680,3685,3688,3690,3786,3912,3915,4067,4116,4233,4313,4318,4478,4627,4628,4637,4651,4665,4684,4736,4753,4756,5058,5291,5295,5306,5567,5595,5600,5664,5686,5698,5707,5709,5720,5879,5979,6092,6132,…	ACTB,AP2A2,AP2B1,ALCAM,ANK1,ANK3,RHOB,CACNA1C,CACNB1,CDC42,COL2A1,COL3A1,COL4A1,COL4A2,COL5A1,COL5A2,COL6A1,COL6A2,COL6A3,CYP51A1,DAB1,DLG3,DNM1,DNM2,DOCK1,DPYSL2,DPYSL3,EFNA1,EPHA3,EPHA4,EPHB2,EPHB6,FGFR1,GDNF,GFRA1,GRB10,GSK3B,HDAC2,HMGCR,HSP90AB1,ISL1,ITGA1,ITGA5,ITGA9,ITGAV,ITGB1,ITGB3,KCNQ3,LAMB1,LAMC1,LYN,MAGOH,MET,MMP2,MMP9,MSN,MYH9,MYH10,MYL6,MYO10,NAB2,NCAM1,RPL10A,NELL2,NEO1,PAK1,PIK3CB…
3_Member	Reactome Gene Sets	R-HSA-422475	Axon guidance	-36.0869	-33.2941	166/552	60,161,163,214,286,288,388,775,782,998,1280,1281,1282,1284,1289,1290,1291,1292,1293,1600,1741,1759,1785,1793,1808,1809,1942,2042,2043,2048,2051,2260,2668,2674,2887,2932,3326,3670,3672,3678,3680,3685,3688,3690,3786,3912,3915,4067,4116,4233,4313,4318,4478,4627,4628,4637,4651,4684,4736,4753,4756,5058,5291,5295,5306,5567,5595,5600,5664,5686,5698,5707,5709,5720,5879,5979,6092,6132,6133,6135,6137,6139,…	ACTB,AP2A2,AP2B1,ALCAM,ANK1,ANK3,RHOB,CACNA1C,CACNB1,CDC42,COL2A1,COL3A1,COL4A1,COL4A2,COL5A1,COL5A2,COL6A1,COL6A2,COL6A3,DAB1,DLG3,DNM1,DNM2,DOCK1,DPYSL2,DPYSL3,EFNA1,EPHA3,EPHA4,EPHB2,EPHB6,FGFR1,GDNF,GFRA1,GRB10,GSK3B,HSP90AB1,ISL1,ITGA1,ITGA5,ITGA9,ITGAV,ITGB1,ITGB3,KCNQ3,LAMB1,LAMC1,LYN,MAGOH,MET,MMP2,MMP9,MSN,MYH9,MYH10,MYL6,MYO10,NCAM1,RPL10A,NELL2,NEO1,PAK1,PIK3CB,PIK3R1,PITPNA,PRKACB,MAP…
4_Summary	Reactome Gene Sets	R-HSA-9006934	Signaling by Receptor Tyrosine Kinases	-36.6012	-33.6835	161/521	14,60,161,163,348,523,526,529,627,639,805,857,998,1108,1277,1278,1280,1281,1282,1284,1289,1290,1291,1292,1293,1302,1495,1499,1759,1785,1793,1839,1846,1960,2069,2152,2185,2247,2250,2252,2255,2260,2263,2277,2335,2354,2554,2560,2561,2562,2591,2887,3065,3066,3082,3178,3185,3399,3479,3675,3685,3688,3690,3709,3710,3728,3909,3910,3911,3912,3915,4067,4208,4233,4254,4318,4609,4665,4803,5046,5058,5140,5154…	AAMP,ACTB,AP2A2,AP2B1,APOE,ATP6V1A,ATP6V1B2,ATP6V1E1,BDNF,PRDM1,CALM2,CAV1,CDC42,CHD4,COL1A1,COL1A2,COL2A1,COL3A1,COL4A1,COL4A2,COL5A1,COL5A2,COL6A1,COL6A2,COL6A3,COL11A2,CTNNA1,CTNNB1,DNM1,DNM2,DOCK1,HBEGF,DUSP4,EGR3,EREG,F3,PTK2B,FGF2,FGF5,FGF7,FGF10,FGFR1,FGFR2,VEGFD,FN1,FOSB,GABRA1,GABRB1,GABRB2,GABRB3,GALNT3,GRB10,HDAC1,HDAC2,HGF,HNRNPA1,HNRNPF,ID3,IGF1,ITGA3,ITGAV,ITGB1,ITGB3,ITPR2,ITPR3,JU…
4_Member	Reactome Gene Sets	R-HSA-9006934	Signaling by Receptor Tyrosine Kinases	-36.6012	-33.6835	161/521	14,60,161,163,348,523,526,529,627,639,805,857,998,1108,1277,1278,1280,1281,1282,1284,1289,1290,1291,1292,1293,1302,1495,1499,1759,1785,1793,1839,1846,1960,2069,2152,2185,2247,2250,2252,2255,2260,2263,2277,2335,2354,2554,2560,2561,2562,2591,2887,3065,3066,3082,3178,3185,3399,3479,3675,3685,3688,3690,3709,3710,3728,3909,3910,3911,3912,3915,4067,4208,4233,4254,4318,4609,4665,4803,5046,5058,5140,5154…	AAMP,ACTB,AP2A2,AP2B1,APOE,ATP6V1A,ATP6V1B2,ATP6V1E1,BDNF,PRDM1,CALM2,CAV1,CDC42,CHD4,COL1A1,COL1A2,COL2A1,COL3A1,COL4A1,COL4A2,COL5A1,COL5A2,COL6A1,COL6A2,COL6A3,COL11A2,CTNNA1,CTNNB1,DNM1,DNM2,DOCK1,HBEGF,DUSP4,EGR3,EREG,F3,PTK2B,FGF2,FGF5,FGF7,FGF10,FGFR1,FGFR2,VEGFD,FN1,FOSB,GABRA1,GABRB1,GABRB2,GABRB3,GALNT3,GRB10,HDAC1,HDAC2,HGF,HNRNPA1,HNRNPF,ID3,IGF1,ITGA3,ITGAV,ITGB1,ITGB3,ITPR2,ITPR3,JU…
5_Summary	Reactome Gene Sets	R-HSA-9012999	RHO GTPase cycle	-30.5451	-27.8493	137/449	29,60,87,120,388,391,393,395,396,398,857,998,1123,1124,1152,1627,1629,1793,2010,2040,2185,2245,2697,3183,3326,3336,3688,3728,3895,3930,3998,4001,4162,4722,4810,5058,5295,5756,5783,5879,6242,6472,6510,6711,6793,7037,7112,7170,7171,7431,7879,7984,8027,8476,8503,8654,8826,8997,9146,9181,9217,9411,9414,9475,9497,9528,9590,9748,9886,10160,10250,10376,10395,10409,10424,10458,10576,10602,10726,10810,108…	ABR,ACTB,ACTN1,ADD3,RHOB,RHOG,ARHGAP4,ARHGAP6,ARHGDIA,ARHGDIG,CAV1,CDC42,CHN1,CHN2,CKB,DBN1,DBT,DOCK1,EMD,STOM,PTK2B,FGD1,GJA1,HNRNPC,HSP90AB1,HSPE1,ITGB1,JUP,KTN1,LBR,LMAN1,LMNB1,MCAM,NDUFS3,NHS,PAK1,PIK3R1,TWF1,PTPN13,RAC1,RTKN,SHMT2,SLC1A5,SPTBN1,STK10,TFRC,TMPO,TPM3,TPM4,VIM,RAB7A,ARHGEF5,STAM,CDC42BPA,PIK3R3,PDE5A,IQGAP1,KALRN,HGS,ARHGEF2,VAPB,ARHGAP29,TJP2,ROCK2,SLC4A7,TMEM59,AKAP12,SLK,RHO…
5_Member	Reactome Gene Sets	R-HSA-9012999	RHO GTPase cycle	-30.5451	-27.8493	137/449	29,60,87,120,388,391,393,395,396,398,857,998,1123,1124,1152,1627,1629,1793,2010,2040,2185,2245,2697,3183,3326,3336,3688,3728,3895,3930,3998,4001,4162,4722,4810,5058,5295,5756,5783,5879,6242,6472,6510,6711,6793,7037,7112,7170,7171,7431,7879,7984,8027,8476,8503,8654,8826,8997,9146,9181,9217,9411,9414,9475,9497,9528,9590,9748,9886,10160,10250,10376,10395,10409,10424,10458,10576,10602,10726,10810,108…	ABR,ACTB,ACTN1,ADD3,RHOB,RHOG,ARHGAP4,ARHGAP6,ARHGDIA,ARHGDIG,CAV1,CDC42,CHN1,CHN2,CKB,DBN1,DBT,DOCK1,EMD,STOM,PTK2B,FGD1,GJA1,HNRNPC,HSP90AB1,HSPE1,ITGB1,JUP,KTN1,LBR,LMAN1,LMNB1,MCAM,NDUFS3,NHS,PAK1,PIK3R1,TWF1,PTPN13,RAC1,RTKN,SHMT2,SLC1A5,SPTBN1,STK10,TFRC,TMPO,TPM3,TPM4,VIM,RAB7A,ARHGEF5,STAM,CDC42BPA,PIK3R3,PDE5A,IQGAP1,KALRN,HGS,ARHGEF2,VAPB,ARHGAP29,TJP2,ROCK2,SLC4A7,TMEM59,AKAP12,SLK,RHO…
5_Member	Reactome Gene Sets	R-HSA-194315	Signaling by Rho GTPases	-24.7749	-22.4593	171/707	29,60,87,120,367,388,391,393,395,396,398,805,857,998,1123,1124,1152,1495,1499,1627,1629,1793,2010,2017,2040,2185,2245,2316,2697,3183,3326,3336,3688,3728,3796,3895,3930,3998,4001,4162,4627,4628,4637,4638,4659,4722,4810,4928,5058,5295,5580,5595,5600,5756,5783,5879,5903,5905,6242,6249,6472,6510,6711,6722,6793,7037,7112,7170,7171,7280,7431,7879,7984,8027,8348,8379,8476,8503,8654,8826,8997,9146,9181,9…	ABR,ACTB,ACTN1,ADD3,AR,RHOB,RHOG,ARHGAP4,ARHGAP6,ARHGDIA,ARHGDIG,CALM2,CAV1,CDC42,CHN1,CHN2,CKB,CTNNA1,CTNNB1,DBN1,DBT,DOCK1,EMD,CTTN,STOM,PTK2B,FGD1,FLNA,GJA1,HNRNPC,HSP90AB1,HSPE1,ITGB1,JUP,KIF2A,KTN1,LBR,LMAN1,LMNB1,MCAM,MYH9,MYH10,MYL6,MYLK,PPP1R12A,NDUFS3,NHS,NUP98,PAK1,PIK3R1,PRKCD,MAPK3,MAPK11,TWF1,PTPN13,RAC1,RANBP2,RANGAP1,RTKN,CLIP1,SHMT2,SLC1A5,SPTBN1,SRF,STK10,TFRC,TMPO,TPM3,TPM4,TUBB…
5_Member	Reactome Gene Sets	R-HSA-9716542	Signaling by Rho GTPases, Miro GTPases and RHOBTB3	-24.4994	-22.2807	173/723	29,60,87,120,367,388,391,393,395,396,398,805,857,898,998,1123,1124,1152,1495,1499,1627,1629,1793,2010,2017,2040,2185,2245,2316,2697,3183,3326,3336,3688,3728,3796,3895,3930,3998,4001,4162,4627,4628,4637,4638,4659,4722,4810,4928,5058,5295,5580,5595,5600,5756,5783,5879,5903,5905,6242,6249,6472,6510,6711,6722,6793,7037,7112,7170,7171,7280,7431,7879,7984,8027,8348,8379,8476,8503,8654,8826,8997,9146,91…	ABR,ACTB,ACTN1,ADD3,AR,RHOB,RHOG,ARHGAP4,ARHGAP6,ARHGDIA,ARHGDIG,CALM2,CAV1,CCNE1,CDC42,CHN1,CHN2,CKB,CTNNA1,CTNNB1,DBN1,DBT,DOCK1,EMD,CTTN,STOM,PTK2B,FGD1,FLNA,GJA1,HNRNPC,HSP90AB1,HSPE1,ITGB1,JUP,KIF2A,KTN1,LBR,LMAN1,LMNB1,MCAM,MYH9,MYH10,MYL6,MYLK,PPP1R12A,NDUFS3,NHS,NUP98,PAK1,PIK3R1,PRKCD,MAPK3,MAPK11,TWF1,PTPN13,RAC1,RANBP2,RANGAP1,RTKN,CLIP1,SHMT2,SLC1A5,SPTBN1,SRF,STK10,TFRC,TMPO,TPM3,TPM…
5_Member	Reactome Gene Sets	R-HSA-9013148	CDC42 GTPase cycle	-13.3464	-11.5227	52/159	29,393,396,398,857,998,1123,2040,2245,3728,3895,3930,5058,5295,7037,7112,7879,7984,8476,8826,9411,10160,10395,10458,10602,11135,23229,23263,23513,25791,25894,28964,51133,51291,55240,57514,57522,57580,80243,80728,81704,84364,85360,85440,89846,90627,115557,115703,121512,128272,144402,221178	ABR,ARHGAP4,ARHGDIA,ARHGDIG,CAV1,CDC42,CHN1,STOM,FGD1,JUP,KTN1,LBR,PAK1,PIK3R1,TFRC,TMPO,RAB7A,ARHGEF5,CDC42BPA,IQGAP1,ARHGAP29,FARP1,DLC1,BAIAP2,CDC42EP3,CDC42EP1,ARHGEF9,MCF2L,SCRIB,NGEF,PLEKHG4,GIT1,KCTD3,GMIP,STEAP3,ARHGAP31,SRGAP1,PREX1,PREX2,ARHGAP39,DOCK8,ARFGAP2,SYDE1,DOCK7,FGD3,STARD13,ARHGEF25,ARHGAP33,FGD4,ARHGEF19,CPNE8,SPATA13
5_Member	Reactome Gene Sets	R-HSA-8980692	RHOA GTPase cycle	-12.3479	-10.6063	48/147	29,393,395,396,857,2040,3728,3895,3930,3998,4162,5295,6242,6793,7037,7112,7984,8826,8997,9181,9217,9411,9414,9475,9748,10160,10395,10424,23256,23263,25791,25894,50650,51291,54443,55160,55914,57514,57522,57580,64283,80243,80728,90627,93663,115557,128272,284119	ABR,ARHGAP4,ARHGAP6,ARHGDIA,CAV1,STOM,JUP,KTN1,LBR,LMAN1,MCAM,PIK3R1,RTKN,STK10,TFRC,TMPO,ARHGEF5,IQGAP1,KALRN,ARHGEF2,VAPB,ARHGAP29,TJP2,ROCK2,SLK,FARP1,DLC1,PGRMC2,SCFD1,MCF2L,NGEF,PLEKHG4,ARHGEF3,GMIP,ANLN,ARHGEF10L,ERBIN,ARHGAP31,SRGAP1,PREX1,ARHGEF28,PREX2,ARHGAP39,STARD13,ARHGAP18,ARHGEF25,ARHGEF19,CAVIN1
5_Member	Reactome Gene Sets	R-HSA-9013149	RAC1 GTPase cycle	-12.1435	-10.4115	55/185	29,393,396,857,998,1123,1124,1793,2010,3688,3895,3930,4162,4810,5058,5295,5879,6510,7037,7112,7879,7984,8476,8503,8826,8997,9411,10160,10395,10458,10810,10979,11135,23075,23263,23344,25791,25894,26230,28964,51291,55914,57514,57522,57580,80243,80728,81704,84144,85440,115557,115703,128272,221178,347902	ABR,ARHGAP4,ARHGDIA,CAV1,CDC42,CHN1,CHN2,DOCK1,EMD,ITGB1,KTN1,LBR,MCAM,NHS,PAK1,PIK3R1,RAC1,SLC1A5,TFRC,TMPO,RAB7A,ARHGEF5,CDC42BPA,PIK3R3,IQGAP1,KALRN,ARHGAP29,FARP1,DLC1,BAIAP2,WASF3,FERMT2,CDC42EP1,SWAP70,MCF2L,ESYT1,NGEF,PLEKHG4,TIAM2,GIT1,GMIP,ERBIN,ARHGAP31,SRGAP1,PREX1,PREX2,ARHGAP39,DOCK8,SYDE2,DOCK7,ARHGEF25,ARHGAP33,ARHGEF19,SPATA13,AMIGO2
5_Member	Reactome Gene Sets	R-HSA-9013106	RHOC GTPase cycle	-11.4181	-9.77913	31/74	29,396,857,2040,3728,3930,3998,4162,5295,6242,6793,7037,7112,7984,8826,9217,9414,9475,9748,10395,23263,54443,55160,55914,57580,64283,80728,90627,93663,115557,284119	ABR,ARHGDIA,CAV1,STOM,JUP,LBR,LMAN1,MCAM,PIK3R1,RTKN,STK10,TFRC,TMPO,ARHGEF5,IQGAP1,VAPB,TJP2,ROCK2,SLK,DLC1,MCF2L,ANLN,ARHGEF10L,ERBIN,PREX1,ARHGEF28,ARHGAP39,STARD13,ARHGAP18,ARHGEF25,CAVIN1
5_Member	Reactome Gene Sets	R-HSA-9013026	RHOB GTPase cycle	-9.81062	-8.31891	28/70	29,388,398,857,2040,3728,4162,5295,6242,6793,7037,7984,9181,9414,9475,9748,10395,23263,50650,54443,55160,55914,57580,64283,80728,90627,115557,284119	ABR,RHOB,ARHGDIG,CAV1,STOM,JUP,MCAM,PIK3R1,RTKN,STK10,TFRC,ARHGEF5,ARHGEF2,TJP2,ROCK2,SLK,DLC1,MCF2L,ARHGEF3,ANLN,ARHGEF10L,ERBIN,PREX1,ARHGEF28,ARHGAP39,STARD13,ARHGEF25,CAVIN1
6_Summary	Reactome Gene Sets	R-HSA-109582	Hemostasis	-28.8195	-26.2028	165/621	14,60,81,87,226,284,302,308,338,388,391,408,481,483,488,489,493,682,747,805,813,830,857,967,972,998,1191,1277,1278,1521,1525,1608,1793,1893,2152,2161,2277,2316,2335,2621,2626,2627,2770,2773,2783,2788,2791,2888,2977,3065,3066,3082,3479,3655,3672,3675,3678,3685,3688,3689,3690,3709,3710,3778,3796,3797,3920,3959,4067,5026,5027,5054,5153,5154,5155,5269,5270,5271,5291,5295,5327,5328,5329,5336,5341,5567…	AAMP,ACTB,ACTN4,ACTN1,ALDOA,ANGPT1,ANXA2,ANXA5,APOB,RHOB,RHOG,ARRB1,ATP1B1,ATP1B3,ATP2A2,ATP2A3,ATP2B4,BSG,DAGLA,CALM2,CALU,CAPZA2,CAV1,CD63,CD74,CDC42,CLU,COL1A1,COL1A2,CTSW,CXADR,DGKG,DOCK1,ECM1,F3,F12,VEGFD,FLNA,FN1,GAS6,GATA4,GATA6,GNAI1,GNAI3,GNB2,GNG7,GNG11,GRB14,GUCY1A2,HDAC1,HDAC2,HGF,IGF1,ITGA6,ITGA1,ITGA3,ITGA5,ITGAV,ITGB1,ITGB2,ITGB3,ITPR2,ITPR3,KCNMA1,KIF2A,KIF3C,LAMP2,LGALS3BP,LYN,P2…
6_Member	Reactome Gene Sets	R-HSA-109582	Hemostasis	-28.8195	-26.2028	165/621	14,60,81,87,226,284,302,308,338,388,391,408,481,483,488,489,493,682,747,805,813,830,857,967,972,998,1191,1277,1278,1521,1525,1608,1793,1893,2152,2161,2277,2316,2335,2621,2626,2627,2770,2773,2783,2788,2791,2888,2977,3065,3066,3082,3479,3655,3672,3675,3678,3685,3688,3689,3690,3709,3710,3778,3796,3797,3920,3959,4067,5026,5027,5054,5153,5154,5155,5269,5270,5271,5291,5295,5327,5328,5329,5336,5341,5567…	AAMP,ACTB,ACTN4,ACTN1,ALDOA,ANGPT1,ANXA2,ANXA5,APOB,RHOB,RHOG,ARRB1,ATP1B1,ATP1B3,ATP2A2,ATP2A3,ATP2B4,BSG,DAGLA,CALM2,CALU,CAPZA2,CAV1,CD63,CD74,CDC42,CLU,COL1A1,COL1A2,CTSW,CXADR,DGKG,DOCK1,ECM1,F3,F12,VEGFD,FLNA,FN1,GAS6,GATA4,GATA6,GNAI1,GNAI3,GNB2,GNG7,GNG11,GRB14,GUCY1A2,HDAC1,HDAC2,HGF,IGF1,ITGA6,ITGA1,ITGA3,ITGA5,ITGAV,ITGB1,ITGB2,ITGB3,ITPR2,ITPR3,KCNMA1,KIF2A,KIF3C,LAMP2,LGALS3BP,LYN,P2…
6_Member	Reactome Gene Sets	R-HSA-76002	Platelet activation, signaling and aggregation	-20.3641	-18.2703	84/263	14,81,87,226,308,388,391,408,747,805,813,967,998,1191,1277,1278,1521,1608,1893,2277,2316,2335,2621,2770,2773,2783,2788,2791,3082,3479,3690,3709,3710,3920,3959,4067,5054,5154,5155,5291,5295,5336,5341,5580,5595,5627,5768,5874,5879,5908,6678,6850,7040,7042,7043,7057,7066,7076,7094,7114,7414,7424,7873,8407,8503,8526,9564,9749,9948,10411,10447,10487,10916,11069,11343,23533,51571,51706,54331,54863,5934…	AAMP,ACTN4,ACTN1,ALDOA,ANXA5,RHOB,RHOG,ARRB1,DAGLA,CALM2,CALU,CD63,CDC42,CLU,COL1A1,COL1A2,CTSW,DGKG,ECM1,VEGFD,FLNA,FN1,GAS6,GNAI1,GNAI3,GNB2,GNG7,GNG11,HGF,IGF1,ITGB3,ITPR2,ITPR3,LAMP2,LGALS3BP,LYN,SERPINE1,PDGFA,PDGFB,PIK3CB,PIK3R1,PLCG2,PLEK,PRKCD,MAPK3,PROS1,QSOX1,RAB27B,RAC1,RAP1B,SPARC,SYK,TGFB1,TGFB2,TGFB3,THBS1,THPO,TIMP1,TLN1,TMSB4X,VCL,VEGFC,MANF,TAGLN2,PIK3R3,DGKE,BCAR1,PHACTR2,WDR1,R…
6_Member	Reactome Gene Sets	R-HSA-114608	Platelet degranulation	-14.837	-12.9607	48/129	81,87,226,308,805,813,967,1191,1521,1893,2277,2316,2335,2621,3082,3479,3690,3920,3959,5054,5154,5155,5341,5627,5768,5874,6678,7040,7042,7043,7057,7076,7094,7114,7414,7424,7873,8407,9749,9948,10447,10487,10916,51571,51706,54863,78991,94121	ACTN4,ACTN1,ALDOA,ANXA5,CALM2,CALU,CD63,CLU,CTSW,ECM1,VEGFD,FLNA,FN1,GAS6,HGF,IGF1,ITGB3,LAMP2,LGALS3BP,SERPINE1,PDGFA,PDGFB,PLEK,PROS1,QSOX1,RAB27B,SPARC,TGFB1,TGFB2,TGFB3,THBS1,TIMP1,TLN1,TMSB4X,VCL,VEGFC,MANF,TAGLN2,PHACTR2,WDR1,FAM3C,CAP1,MAGED2,CYRIB,CYB5R1,TOR4A,PCYOX1L,SYTL4
6_Member	Reactome Gene Sets	R-HSA-76005	Response to elevated platelet cytosolic Ca2+	-14.09	-12.2393	48/134	81,87,226,308,805,813,967,1191,1521,1893,2277,2316,2335,2621,3082,3479,3690,3920,3959,5054,5154,5155,5341,5627,5768,5874,6678,7040,7042,7043,7057,7076,7094,7114,7414,7424,7873,8407,9749,9948,10447,10487,10916,51571,51706,54863,78991,94121	ACTN4,ACTN1,ALDOA,ANXA5,CALM2,CALU,CD63,CLU,CTSW,ECM1,VEGFD,FLNA,FN1,GAS6,HGF,IGF1,ITGB3,LAMP2,LGALS3BP,SERPINE1,PDGFA,PDGFB,PLEK,PROS1,QSOX1,RAB27B,SPARC,TGFB1,TGFB2,TGFB3,THBS1,TIMP1,TLN1,TMSB4X,VCL,VEGFC,MANF,TAGLN2,PHACTR2,WDR1,FAM3C,CAP1,MAGED2,CYRIB,CYB5R1,TOR4A,PCYOX1L,SYTL4
7_Summary	Reactome Gene Sets	R-HSA-2262752	Cellular responses to stress	-24.7059	-22.4251	179/757	118,318,338,367,440,467,475,523,526,529,573,811,815,817,830,847,898,1019,1032,1327,1340,1410,1639,1870,1968,2288,2887,2908,2932,3005,3159,3162,3303,3326,3337,3490,4000,4001,4208,4217,4306,4343,4361,4363,4697,4736,4928,5034,5052,5580,5595,5600,5608,5686,5698,5707,5709,5720,5903,5928,5931,6095,6132,6133,6135,6137,6139,6147,6152,6154,6158,6160,6164,6165,6168,6187,6189,6191,6193,6194,6196,6203,6204,6…	ADD1,NUDT2,APOB,AR,ASNS,ATF3,ATOX1,ATP6V1A,ATP6V1B2,ATP6V1E1,BAG1,CALR,CAMK2A,CAMK2D,CAPZA2,CAT,CCNE1,CDK4,CDKN2D,COX4I1,COX6B1,CRYAB,DCTN1,E2F2,EIF2S3,FKBP4,GRB10,NR3C1,GSK3B,H1-0,HMGA1,HMOX1,HSPA1A,HSP90AB1,DNAJB1,IGFBP7,LMNA,LMNB1,MEF2C,MAP3K5,NR3C2,MOV10,MRE11,ABCC1,NDUFA4,RPL10A,NUP98,P4HB,PRDX1,PRKCD,MAPK3,MAPK11,MAP2K6,PSMA5,PSMB9,PSMD1,PSMD3,PSME1,RANBP2,RBBP4,RBBP7,RORA,RPL8,RPL9,RPL11,R…
7_Member	Reactome Gene Sets	R-HSA-2262752	Cellular responses to stress	-24.7059	-22.4251	179/757	118,318,338,367,440,467,475,523,526,529,573,811,815,817,830,847,898,1019,1032,1327,1340,1410,1639,1870,1968,2288,2887,2908,2932,3005,3159,3162,3303,3326,3337,3490,4000,4001,4208,4217,4306,4343,4361,4363,4697,4736,4928,5034,5052,5580,5595,5600,5608,5686,5698,5707,5709,5720,5903,5928,5931,6095,6132,6133,6135,6137,6139,6147,6152,6154,6158,6160,6164,6165,6168,6187,6189,6191,6193,6194,6196,6203,6204,6…	ADD1,NUDT2,APOB,AR,ASNS,ATF3,ATOX1,ATP6V1A,ATP6V1B2,ATP6V1E1,BAG1,CALR,CAMK2A,CAMK2D,CAPZA2,CAT,CCNE1,CDK4,CDKN2D,COX4I1,COX6B1,CRYAB,DCTN1,E2F2,EIF2S3,FKBP4,GRB10,NR3C1,GSK3B,H1-0,HMGA1,HMOX1,HSPA1A,HSP90AB1,DNAJB1,IGFBP7,LMNA,LMNB1,MEF2C,MAP3K5,NR3C2,MOV10,MRE11,ABCC1,NDUFA4,RPL10A,NUP98,P4HB,PRDX1,PRKCD,MAPK3,MAPK11,MAP2K6,PSMA5,PSMB9,PSMD1,PSMD3,PSME1,RANBP2,RBBP4,RBBP7,RORA,RPL8,RPL9,RPL11,R…
7_Member	Reactome Gene Sets	R-HSA-8953897	Cellular responses to stimuli	-24.5921	-22.3434	181/771	118,318,338,367,440,467,475,523,526,529,573,811,815,817,830,847,898,1019,1032,1327,1340,1410,1465,1639,1870,1968,2288,2887,2908,2932,3005,3159,3162,3303,3326,3337,3490,4000,4001,4208,4217,4306,4343,4361,4363,4502,4697,4736,4928,5034,5052,5580,5595,5600,5608,5686,5698,5707,5709,5720,5903,5928,5931,6095,6132,6133,6135,6137,6139,6147,6152,6154,6158,6160,6164,6165,6168,6187,6189,6191,6193,6194,6196,6…	ADD1,NUDT2,APOB,AR,ASNS,ATF3,ATOX1,ATP6V1A,ATP6V1B2,ATP6V1E1,BAG1,CALR,CAMK2A,CAMK2D,CAPZA2,CAT,CCNE1,CDK4,CDKN2D,COX4I1,COX6B1,CRYAB,CSRP1,DCTN1,E2F2,EIF2S3,FKBP4,GRB10,NR3C1,GSK3B,H1-0,HMGA1,HMOX1,HSPA1A,HSP90AB1,DNAJB1,IGFBP7,LMNA,LMNB1,MEF2C,MAP3K5,NR3C2,MOV10,MRE11,ABCC1,MT2A,NDUFA4,RPL10A,NUP98,P4HB,PRDX1,PRKCD,MAPK3,MAPK11,MAP2K6,PSMA5,PSMB9,PSMD1,PSMD3,PSME1,RANBP2,RBBP4,RBBP7,RORA,RPL8,R…
8_Summary	Reactome Gene Sets	R-HSA-6798695	Neutrophil degranulation	-23.6052	-21.4145	130/480	30,47,55,161,178,210,226,272,302,317,353,391,411,427,684,718,847,929,967,976,978,1265,1509,1512,1522,1650,1654,1727,1938,1992,2040,2171,2444,2495,2512,2519,2548,2588,2821,2934,2990,3074,3105,3146,3303,3326,3417,3614,3615,3685,3689,3728,3837,3920,3958,4126,4311,4318,5036,5236,5269,5317,5328,5329,5476,5580,5686,5707,5709,5768,5787,5795,5806,5834,5878,5879,5908,6282,6556,6590,6793,6836,7097,7130,713…	ACAA1,ACLY,ACP3,AP2A2,AGL,ALAD,ALDOA,AMPD3,ANXA2,APAF1,APRT,RHOG,ARSB,ASAH1,BST2,C3,CAT,CD14,CD63,ADGRE5,CDA,CNN2,CTSD,CTSH,CTSZ,DDOST,DDX3X,CYB5R3,EEF2,SERPINB1,STOM,FABP5,FRK,FTH1,FTL,FUCA2,GAA,GALNS,GPI,GSN,GUSB,HEXB,HLA-A,HMGB1,HSPA1A,HSP90AB1,IDH1,IMPDH1,IMPDH2,ITGAV,ITGB2,JUP,KPNB1,LAMP2,LGALS3,MANBA,MME,MMP9,PA2G4,PGM1,SERPINB6,PKP1,PLAU,PLAUR,CTSA,PRKCD,PSMA5,PSMD1,PSMD3,QSOX1,PTPRB,PTPRJ…
8_Member	Reactome Gene Sets	R-HSA-6798695	Neutrophil degranulation	-23.6052	-21.4145	130/480	30,47,55,161,178,210,226,272,302,317,353,391,411,427,684,718,847,929,967,976,978,1265,1509,1512,1522,1650,1654,1727,1938,1992,2040,2171,2444,2495,2512,2519,2548,2588,2821,2934,2990,3074,3105,3146,3303,3326,3417,3614,3615,3685,3689,3728,3837,3920,3958,4126,4311,4318,5036,5236,5269,5317,5328,5329,5476,5580,5686,5707,5709,5768,5787,5795,5806,5834,5878,5879,5908,6282,6556,6590,6793,6836,7097,7130,713…	ACAA1,ACLY,ACP3,AP2A2,AGL,ALAD,ALDOA,AMPD3,ANXA2,APAF1,APRT,RHOG,ARSB,ASAH1,BST2,C3,CAT,CD14,CD63,ADGRE5,CDA,CNN2,CTSD,CTSH,CTSZ,DDOST,DDX3X,CYB5R3,EEF2,SERPINB1,STOM,FABP5,FRK,FTH1,FTL,FUCA2,GAA,GALNS,GPI,GSN,GUSB,HEXB,HLA-A,HMGB1,HSPA1A,HSP90AB1,IDH1,IMPDH1,IMPDH2,ITGAV,ITGB2,JUP,KPNB1,LAMP2,LGALS3,MANBA,MME,MMP9,PA2G4,PGM1,SERPINB6,PKP1,PLAU,PLAUR,CTSA,PRKCD,PSMA5,PSMD1,PSMD3,QSOX1,PTPRB,PTPRJ…
9_Summary	Reactome Gene Sets	R-HSA-71387	Metabolism of carbohydrates	-20.834	-18.6944	91/295	178,226,411,633,805,1462,1464,1634,1836,2023,2026,2027,2331,2524,2548,2588,2597,2805,2821,2990,3037,3073,3074,3098,3339,4126,4191,4928,5106,5209,5210,5213,5226,5236,5549,5567,5834,5903,6233,6383,6448,6482,6576,6652,7086,7167,7360,8534,8703,9060,9334,9348,9394,9435,9469,9631,9672,9688,9953,9955,9957,10007,10090,10165,10327,10762,22856,23165,23324,23511,23729,26007,50515,51181,53371,55501,55706,557…	AGL,ALDOA,ARSB,BGN,CALM2,VCAN,CSPG4,DCN,SLC26A2,ENO1,ENO2,ENO3,FMOD,FUT2,GAA,GALNS,GAPDH,GOT1,GPI,GUSB,HAS2,HEXA,HEXB,HK1,HSPG2,MANBA,MDH2,NUP98,PCK2,PFKFB3,PFKFB4,PFKM,PGD,PGM1,PRELP,PRKACB,PYGB,RANBP2,RPS27A,SDC2,SGSH,ST3GAL1,SLC25A1,SORD,TKT,TPI1,UGP2,CHST1,B4GALT3,PAPSS2,B4GALT5,NDST3,HS6ST1,CHST2,CHST3,NUP155,SDC3,NUP93,HS3ST3B1,HS3ST3A1,HS3ST1,GNPDA1,UST,SLC25A13,AKR1A1,NUP50,CHSY1,NUP205,M…
9_Member	Reactome Gene Sets	R-HSA-71387	Metabolism of carbohydrates	-20.834	-18.6944	91/295	178,226,411,633,805,1462,1464,1634,1836,2023,2026,2027,2331,2524,2548,2588,2597,2805,2821,2990,3037,3073,3074,3098,3339,4126,4191,4928,5106,5209,5210,5213,5226,5236,5549,5567,5834,5903,6233,6383,6448,6482,6576,6652,7086,7167,7360,8534,8703,9060,9334,9348,9394,9435,9469,9631,9672,9688,9953,9955,9957,10007,10090,10165,10327,10762,22856,23165,23324,23511,23729,26007,50515,51181,53371,55501,55706,557…	AGL,ALDOA,ARSB,BGN,CALM2,VCAN,CSPG4,DCN,SLC26A2,ENO1,ENO2,ENO3,FMOD,FUT2,GAA,GALNS,GAPDH,GOT1,GPI,GUSB,HAS2,HEXA,HEXB,HK1,HSPG2,MANBA,MDH2,NUP98,PCK2,PFKFB3,PFKFB4,PFKM,PGD,PGM1,PRELP,PRKACB,PYGB,RANBP2,RPS27A,SDC2,SGSH,ST3GAL1,SLC25A1,SORD,TKT,TPI1,UGP2,CHST1,B4GALT3,PAPSS2,B4GALT5,NDST3,HS6ST1,CHST2,CHST3,NUP155,SDC3,NUP93,HS3ST3B1,HS3ST3A1,HS3ST1,GNPDA1,UST,SLC25A13,AKR1A1,NUP50,CHSY1,NUP205,M…
9_Member	Reactome Gene Sets	R-HSA-1630316	Glycosaminoglycan metabolism	-11.4879	-9.83343	42/124	411,633,1462,1464,1634,1836,2331,2588,2990,3037,3073,3074,3339,5549,6383,6448,6482,8534,8703,9060,9334,9348,9394,9435,9469,9672,9953,9955,9957,10090,22856,50515,55501,55790,57214,64131,79586,83539,90161,337876,347734,375790	ARSB,BGN,VCAN,CSPG4,DCN,SLC26A2,FMOD,GALNS,GUSB,HAS2,HEXA,HEXB,HSPG2,PRELP,SDC2,SGSH,ST3GAL1,CHST1,B4GALT3,PAPSS2,B4GALT5,NDST3,HS6ST1,CHST2,CHST3,SDC3,HS3ST3B1,HS3ST3A1,HS3ST1,UST,CHSY1,CHST11,CHST12,CSGALNACT1,CEMIP,XYLT1,CHPF,CHST9,HS6ST2,CHSY3,SLC35B2,AGRN
9_Member	Reactome Gene Sets	R-HSA-1638091	Heparan sulfate/heparin (HS-GAG) metabolism	-4.4559	-3.39756	17/55	633,1462,1464,1634,2990,3339,6383,6448,9348,9394,9672,9953,9955,9957,64131,90161,375790	BGN,VCAN,CSPG4,DCN,GUSB,HSPG2,SDC2,SGSH,NDST3,HS6ST1,SDC3,HS3ST3B1,HS3ST3A1,HS3ST1,XYLT1,HS6ST2,AGRN
9_Member	Reactome Gene Sets	R-HSA-2022928	HS-GAG biosynthesis	-3.18673	-2.72134	7/31	6383,9348,9394,9672,9953,9955,90161	SDC2,NDST3,HS6ST1,SDC3,HS3ST3B1,HS3ST3A1,HS6ST2
10_Summary	Reactome Gene Sets	R-HSA-556833	Metabolism of lipids	-20.7971	-18.6811	167/740	19,30,33,34,35,38,39,47,51,196,411,427,590,857,1376,1573,1595,1632,1666,1717,1718,1892,2171,2173,2180,2182,2224,2274,2583,2629,2678,2710,2820,3030,3033,3073,3074,3156,3157,3295,3422,3837,3930,4036,4047,4056,4199,4363,4534,4598,5007,5019,5264,5286,5291,5295,5468,5476,5499,5538,5563,5565,5567,5742,5743,5783,5868,6095,6307,6309,6342,6576,6604,6667,6713,6785,7421,7923,8395,8398,8503,8540,8560,8612,86…	ABCA1,ACAA1,ACADL,ACADM,ACADS,ACAT1,ACAT2,ACLY,ACOX1,AHR,ARSB,ASAH1,BCHE,CAV1,CPT2,CYP2J2,CYP51A1,ECI1,DECR1,DHCR7,DHCR24,ECHS1,FABP5,FABP7,ACSL1,ACSL4,FDPS,FHL2,B4GALNT1,GBA,GGT1,GK,GPD2,HADHA,HADH,HEXA,HEXB,HMGCR,HMGCS1,HSD17B4,IDI1,KPNB1,LBR,LRP2,LSS,LTC4S,ME1,ABCC1,MTM1,MVK,OSBP,OXCT1,PHYH,PIK3C2A,PIK3CB,PIK3R1,PPARG,CTSA,PPP1CA,PPT1,PRKAA2,PRKAB2,PRKACB,PTGS1,PTGS2,PTPN13,RAB5A,RORA,MSMO1,SC…
10_Member	Reactome Gene Sets	R-HSA-556833	Metabolism of lipids	-20.7971	-18.6811	167/740	19,30,33,34,35,38,39,47,51,196,411,427,590,857,1376,1573,1595,1632,1666,1717,1718,1892,2171,2173,2180,2182,2224,2274,2583,2629,2678,2710,2820,3030,3033,3073,3074,3156,3157,3295,3422,3837,3930,4036,4047,4056,4199,4363,4534,4598,5007,5019,5264,5286,5291,5295,5468,5476,5499,5538,5563,5565,5567,5742,5743,5783,5868,6095,6307,6309,6342,6576,6604,6667,6713,6785,7421,7923,8395,8398,8503,8540,8560,8612,86…	ABCA1,ACAA1,ACADL,ACADM,ACADS,ACAT1,ACAT2,ACLY,ACOX1,AHR,ARSB,ASAH1,BCHE,CAV1,CPT2,CYP2J2,CYP51A1,ECI1,DECR1,DHCR7,DHCR24,ECHS1,FABP5,FABP7,ACSL1,ACSL4,FDPS,FHL2,B4GALNT1,GBA,GGT1,GK,GPD2,HADHA,HADH,HEXA,HEXB,HMGCR,HMGCS1,HSD17B4,IDI1,KPNB1,LBR,LRP2,LSS,LTC4S,ME1,ABCC1,MTM1,MVK,OSBP,OXCT1,PHYH,PIK3C2A,PIK3CB,PIK3R1,PPARG,CTSA,PPP1CA,PPT1,PRKAA2,PRKAB2,PRKACB,PTGS1,PTGS2,PTPN13,RAB5A,RORA,MSMO1,SC…
11_Summary	Reactome Gene Sets	R-HSA-3000171	Non-integrin membrane-ECM interactions	-18.9346	-16.8806	35/59	87,1277,1278,1280,1281,1282,1284,1288,1289,1290,1302,1756,2247,2335,3339,3371,3655,3685,3688,3690,3693,3909,3910,3911,3912,3915,5154,5155,6383,7040,7057,9378,9672,50509,375790,633,1291,1292,1293,1462,1634,1758,2331,3679,3680,4038,4684,5054,6678,7042,7043,682,1294,1307,2200,3672,3675,3678,3689,3695,3696,6696,7087,7412,22801,50848,80781,3082,4233,5879,5908,84951,85301,85440,5295,5795,6233,6455,6457…	ACTN1,COL1A1,COL1A2,COL2A1,COL3A1,COL4A1,COL4A2,COL4A6,COL5A1,COL5A2,COL11A2,DMD,FGF2,FN1,HSPG2,TNC,ITGA6,ITGAV,ITGB1,ITGB3,ITGB5,LAMA3,LAMA4,LAMA5,LAMB1,LAMC1,PDGFA,PDGFB,SDC2,TGFB1,THBS1,NRXN1,SDC3,COL5A3,AGRN,BGN,COL6A1,COL6A2,COL6A3,VCAN,DCN,DMP1,FMOD,ITGA7,ITGA9,LRP4,NCAM1,SERPINE1,SPARC,TGFB2,TGFB3,BSG,COL7A1,COL16A1,FBN1,ITGA1,ITGA3,ITGA5,ITGB2,ITGB7,ITGB8,SPP1,ICAM5,VCAM1,ITGA11,F11R,COL1…
11_Member	Reactome Gene Sets	R-HSA-3000171	Non-integrin membrane-ECM interactions	-18.9346	-16.8806	35/59	87,1277,1278,1280,1281,1282,1284,1288,1289,1290,1302,1756,2247,2335,3339,3371,3655,3685,3688,3690,3693,3909,3910,3911,3912,3915,5154,5155,6383,7040,7057,9378,9672,50509,375790	ACTN1,COL1A1,COL1A2,COL2A1,COL3A1,COL4A1,COL4A2,COL4A6,COL5A1,COL5A2,COL11A2,DMD,FGF2,FN1,HSPG2,TNC,ITGA6,ITGAV,ITGB1,ITGB3,ITGB5,LAMA3,LAMA4,LAMA5,LAMB1,LAMC1,PDGFA,PDGFB,SDC2,TGFB1,THBS1,NRXN1,SDC3,COL5A3,AGRN
11_Member	Reactome Gene Sets	R-HSA-3000178	ECM proteoglycans	-18.933	-16.8806	40/76	633,1277,1278,1280,1281,1282,1284,1288,1289,1290,1291,1292,1293,1462,1634,1758,2331,2335,3339,3371,3679,3680,3685,3688,3690,3693,3909,3910,3911,3912,3915,4038,4684,5054,6678,7040,7042,7043,50509,375790	BGN,COL1A1,COL1A2,COL2A1,COL3A1,COL4A1,COL4A2,COL4A6,COL5A1,COL5A2,COL6A1,COL6A2,COL6A3,VCAN,DCN,DMP1,FMOD,FN1,HSPG2,TNC,ITGA7,ITGA9,ITGAV,ITGB1,ITGB3,ITGB5,LAMA3,LAMA4,LAMA5,LAMB1,LAMC1,LRP4,NCAM1,SERPINE1,SPARC,TGFB1,TGFB2,TGFB3,COL5A3,AGRN
11_Member	Reactome Gene Sets	R-HSA-216083	Integrin cell surface interactions	-17.5799	-15.583	41/85	682,1277,1278,1280,1281,1282,1284,1288,1289,1290,1291,1292,1293,1294,1307,2200,2335,3339,3371,3655,3672,3675,3678,3679,3680,3685,3688,3689,3690,3693,3695,3696,6696,7057,7087,7412,22801,50509,50848,80781,375790	BSG,COL1A1,COL1A2,COL2A1,COL3A1,COL4A1,COL4A2,COL4A6,COL5A1,COL5A2,COL6A1,COL6A2,COL6A3,COL7A1,COL16A1,FBN1,FN1,HSPG2,TNC,ITGA6,ITGA1,ITGA3,ITGA5,ITGA7,ITGA9,ITGAV,ITGB1,ITGB2,ITGB3,ITGB5,ITGB7,ITGB8,SPP1,THBS1,ICAM5,VCAM1,ITGA11,COL5A3,F11R,COL18A1,AGRN
11_Member	Reactome Gene Sets	R-HSA-3000170	Syndecan interactions	-12.6345	-11.3079	15/27	87,1277,1278,1281,1289,1290,2247,3371,3655,3688,3693,6383,7040,7057,9672	ACTN1,COL1A1,COL1A2,COL3A1,COL5A1,COL5A2,FGF2,TNC,ITGA6,ITGB1,ITGB5,SDC2,TGFB1,THBS1,SDC3
11_Member	Reactome Gene Sets	R-HSA-8875878	MET promotes cell motility	-11.9478	-10.2342	23/41	1277,1278,1280,1281,1289,1290,1302,2335,3082,3675,3688,3909,3910,3911,3912,3915,4233,5879,5908,50509,84951,85301,85440	COL1A1,COL1A2,COL2A1,COL3A1,COL5A1,COL5A2,COL11A2,FN1,HGF,ITGA3,ITGB1,LAMA3,LAMA4,LAMA5,LAMB1,LAMC1,MET,RAC1,RAP1B,COL5A3,TNS4,COL27A1,DOCK7
11_Member	Reactome Gene Sets	R-HSA-6806834	Signaling by MET	-11.2882	-9.66734	32/79	1277,1278,1280,1281,1289,1290,1302,2335,3082,3675,3688,3909,3910,3911,3912,3915,4233,5295,5795,5879,5908,6233,6455,6457,6774,8027,9146,30011,50509,84951,85301,85440	COL1A1,COL1A2,COL2A1,COL3A1,COL5A1,COL5A2,COL11A2,FN1,HGF,ITGA3,ITGB1,LAMA3,LAMA4,LAMA5,LAMB1,LAMC1,MET,PIK3R1,PTPRJ,RAC1,RAP1B,RPS27A,SH3GL1,SH3GL3,STAT3,STAM,HGS,SH3KBP1,COL5A3,TNS4,COL27A1,DOCK7
11_Member	Reactome Gene Sets	R-HSA-3000157	Laminin interactions	-11.284	-9.66734	19/30	1282,1284,1288,1294,3339,3655,3672,3675,3679,3685,3688,3909,3910,3911,3912,3915,4811,22795,80781	COL4A1,COL4A2,COL4A6,COL7A1,HSPG2,ITGA6,ITGA1,ITGA3,ITGA7,ITGAV,ITGB1,LAMA3,LAMA4,LAMA5,LAMB1,LAMC1,NID1,NID2,COL18A1
11_Member	Reactome Gene Sets	R-HSA-8874081	MET activates PTK2 signaling	-11.284	-9.66734	19/30	1277,1278,1280,1281,1289,1290,1302,2335,3082,3675,3688,3909,3910,3911,3912,3915,4233,50509,85301	COL1A1,COL1A2,COL2A1,COL3A1,COL5A1,COL5A2,COL11A2,FN1,HGF,ITGA3,ITGB1,LAMA3,LAMA4,LAMA5,LAMB1,LAMC1,MET,COL5A3,COL27A1
12_Summary	Reactome Gene Sets	R-HSA-1280215	Cytokine Signaling in Immune system	-16.4601	-14.4967	152/715	301,302,330,595,598,684,815,817,821,836,941,998,1052,1265,1278,1435,1846,1896,1974,2185,2247,2316,2335,2634,2690,2887,2920,3055,3082,3105,3146,3162,3181,3185,3429,3554,3556,3574,3597,3600,3601,3603,3604,3606,3656,3669,3688,3689,3716,3837,3838,3911,3929,3936,3965,3977,4001,4067,4208,4281,4313,4314,4318,4478,4502,4507,4609,4684,4692,4792,4928,4982,5034,5291,5295,5306,5371,5580,5595,5600,5608,5617,5…	ANXA1,ANXA2,BIRC3,CCND1,BCL2L1,BST2,CAMK2A,CAMK2D,CANX,CASP3,CD80,CDC42,CEBPD,CNN2,COL1A2,CSF1,DUSP4,EDA,EIF4A2,PTK2B,FGF2,FLNA,FN1,GBP2,GHR,GRB10,CXCL2,HCK,HGF,HLA-A,HMGB1,HMOX1,HNRNPA2B1,HNRNPF,IFI27,IL1R1,IL1RAP,IL7,IL13RA1,IL15,IL15RA,IL16,TNFRSF9,IL18,IRAK2,ISG20,ITGB1,ITGB2,JAK1,KPNB1,KPNA2,LAMA5,LBP,LCP1,LGALS9,LIFR,LMNB1,LYN,MEF2C,MID1,MMP2,MMP3,MMP9,MSN,MT2A,MTAP,MYC,NCAM1,NDN,NFKBIA,NUP…
12_Member	Reactome Gene Sets	R-HSA-1280215	Cytokine Signaling in Immune system	-16.4601	-14.4967	152/715	301,302,330,595,598,684,815,817,821,836,941,998,1052,1265,1278,1435,1846,1896,1974,2185,2247,2316,2335,2634,2690,2887,2920,3055,3082,3105,3146,3162,3181,3185,3429,3554,3556,3574,3597,3600,3601,3603,3604,3606,3656,3669,3688,3689,3716,3837,3838,3911,3929,3936,3965,3977,4001,4067,4208,4281,4313,4314,4318,4478,4502,4507,4609,4684,4692,4792,4928,4982,5034,5291,5295,5306,5371,5580,5595,5600,5608,5617,5…	ANXA1,ANXA2,BIRC3,CCND1,BCL2L1,BST2,CAMK2A,CAMK2D,CANX,CASP3,CD80,CDC42,CEBPD,CNN2,COL1A2,CSF1,DUSP4,EDA,EIF4A2,PTK2B,FGF2,FLNA,FN1,GBP2,GHR,GRB10,CXCL2,HCK,HGF,HLA-A,HMGB1,HMOX1,HNRNPA2B1,HNRNPF,IFI27,IL1R1,IL1RAP,IL7,IL13RA1,IL15,IL15RA,IL16,TNFRSF9,IL18,IRAK2,ISG20,ITGB1,ITGB2,JAK1,KPNB1,KPNA2,LAMA5,LBP,LCP1,LGALS9,LIFR,LMNB1,LYN,MEF2C,MID1,MMP2,MMP3,MMP9,MSN,MT2A,MTAP,MYC,NCAM1,NDN,NFKBIA,NUP…
12_Member	Reactome Gene Sets	R-HSA-449147	Signaling by Interleukins	-13.0834	-11.2906	104/462	301,302,595,598,821,836,941,998,1052,1265,1278,1435,1846,2185,2247,2335,2920,3055,3082,3146,3162,3181,3185,3554,3556,3574,3597,3600,3601,3603,3606,3656,3688,3689,3716,3911,3929,3936,3965,3977,4001,4067,4208,4313,4314,4318,4478,4507,4609,4692,4792,5034,5291,5295,5306,5595,5600,5608,5686,5698,5707,5709,5720,5743,5783,5908,6095,6196,6233,6347,6352,6597,6624,6774,6778,6809,6850,6935,7006,7040,7076,71…	ANXA1,ANXA2,CCND1,BCL2L1,CANX,CASP3,CD80,CDC42,CEBPD,CNN2,COL1A2,CSF1,DUSP4,PTK2B,FGF2,FN1,CXCL2,HCK,HGF,HMGB1,HMOX1,HNRNPA2B1,HNRNPF,IL1R1,IL1RAP,IL7,IL13RA1,IL15,IL15RA,IL16,IL18,IRAK2,ITGB1,ITGB2,JAK1,LAMA5,LBP,LCP1,LGALS9,LIFR,LMNB1,LYN,MEF2C,MMP2,MMP3,MMP9,MSN,MTAP,MYC,NDN,NFKBIA,P4HB,PIK3CB,PIK3R1,PITPNA,MAPK3,MAPK11,MAP2K6,PSMA5,PSMB9,PSMD1,PSMD3,PSME1,PTGS2,PTPN13,RAP1B,RORA,RPS6KA2,RPS27…
12_Member	Reactome Gene Sets	R-HSA-6785807	Interleukin-4 and Interleukin-13 signaling	-10.3715	-8.84006	37/108	301,595,598,1052,1278,2247,2335,3082,3162,3597,3606,3688,3689,3716,3911,3929,4313,4314,4318,4609,4692,5295,5743,6095,6347,6624,6774,6778,6935,7040,7076,7133,7184,7297,7412,7431,8651	ANXA1,CCND1,BCL2L1,CEBPD,COL1A2,FGF2,FN1,HGF,HMOX1,IL13RA1,IL18,ITGB1,ITGB2,JAK1,LAMA5,LBP,MMP2,MMP3,MMP9,MYC,NDN,PIK3R1,PTGS2,RORA,CCL2,FSCN1,STAT3,STAT6,ZEB1,TGFB1,TIMP1,TNFRSF1B,HSP90B1,TYK2,VCAM1,VIM,SOCS1
13_Summary	Reactome Gene Sets	R-HSA-5653656	Vesicle-mediated transport	-15.4961	-13.5637	143/673	60,161,162,163,273,274,286,288,338,348,408,805,811,830,949,950,1174,1277,1278,1281,1282,1284,1294,1314,1522,1639,1759,1785,1839,2017,2069,2495,2512,2664,2697,2702,2804,3267,3796,3797,3949,3998,4036,4122,4124,4627,4641,4905,5050,5286,5563,5565,5571,5648,5861,5868,5874,5878,5879,6233,6272,6455,6457,6643,6678,6711,6836,7037,7082,7164,7184,7280,7879,8027,8322,8398,8533,8542,8729,9146,9179,9230,9267,9…	ACTB,AP2A2,AP1B1,AP2B1,AMPH,BIN1,ANK1,ANK3,APOB,APOE,ARRB1,CALM2,CALR,CAPZA2,SCARB1,SCARB2,AP1S1,COL1A1,COL1A2,COL3A1,COL4A1,COL4A2,COL7A1,COPA,CTSZ,DCTN1,DNM1,DNM2,HBEGF,CTTN,EREG,FTH1,FTL,GDI1,GJA1,GJA5,GOLGB1,AGFG1,KIF2A,KIF3C,LDLR,LMAN1,LRP2,MAN2A2,MAN2A1,MYH9,MYO1C,NSF,PAFAH1B3,PIK3C2A,PRKAA2,PRKAB2,PRKAG1,MASP1,RAB1A,RAB5A,RAB27B,RAB5C,RAC1,RPS27A,SORT1,SH3GL1,SH3GL3,SNX2,SPARC,SPTBN1,SURF4…
13_Member	Reactome Gene Sets	R-HSA-5653656	Vesicle-mediated transport	-15.4961	-13.5637	143/673	60,161,162,163,273,274,286,288,338,348,408,805,811,830,949,950,1174,1277,1278,1281,1282,1284,1294,1314,1522,1639,1759,1785,1839,2017,2069,2495,2512,2664,2697,2702,2804,3267,3796,3797,3949,3998,4036,4122,4124,4627,4641,4905,5050,5286,5563,5565,5571,5648,5861,5868,5874,5878,5879,6233,6272,6455,6457,6643,6678,6711,6836,7037,7082,7164,7184,7280,7879,8027,8322,8398,8533,8542,8729,9146,9179,9230,9267,9…	ACTB,AP2A2,AP1B1,AP2B1,AMPH,BIN1,ANK1,ANK3,APOB,APOE,ARRB1,CALM2,CALR,CAPZA2,SCARB1,SCARB2,AP1S1,COL1A1,COL1A2,COL3A1,COL4A1,COL4A2,COL7A1,COPA,CTSZ,DCTN1,DNM1,DNM2,HBEGF,CTTN,EREG,FTH1,FTL,GDI1,GJA1,GJA5,GOLGB1,AGFG1,KIF2A,KIF3C,LDLR,LMAN1,LRP2,MAN2A2,MAN2A1,MYH9,MYO1C,NSF,PAFAH1B3,PIK3C2A,PRKAA2,PRKAB2,PRKAG1,MASP1,RAB1A,RAB5A,RAB27B,RAB5C,RAC1,RPS27A,SORT1,SH3GL1,SH3GL3,SNX2,SPARC,SPTBN1,SURF4…
13_Member	Reactome Gene Sets	R-HSA-199991	Membrane Trafficking	-13.1349	-11.7854	47/634	161,162,163,274,830,950,1174,1522,1759,1785,2017,2512,2804,3267,3998,4641,4905,5571,5861,5868,5879,6233,6643,6711,6836,7037,7082,8533,8729,9146,9230,9321,9342,9525,9554,10226,10484,10890,22848,23256,27095,27131,51594,55667,55707,84364,375056	AP2A2,AP1B1,AP2B1,BIN1,CAPZA2,SCARB2,AP1S1,CTSZ,DNM1,DNM2,CTTN,FTL,GOLGB1,AGFG1,LMAN1,MYO1C,NSF,PRKAG1,RAB1A,RAB5A,RAC1,RPS27A,SNX2,SPTBN1,SURF4,TFRC,TJP1,COPS3,GBF1,HGS,RAB11B,TRIP11,SNAP29,VPS4B,SEC22B,PLIN3,SEC23A,RAB10,AAK1,SCFD1,TRAPPC3,SNX5,NBAS,DENND4C,NECAP2,ARFGAP2,MIA3
13_Member	Reactome Gene Sets	R-HSA-8856828	Clathrin-mediated endocytosis	-7.39442	-6.06032	39/146	60,161,163,273,274,338,408,950,1759,1785,1839,2017,2069,3267,3949,4036,5286,5868,5878,6233,6455,6457,7037,8027,8322,8533,9146,10092,10093,10987,11252,22848,22905,23208,26052,30011,55707,90019,112574	ACTB,AP2A2,AP2B1,AMPH,BIN1,APOB,ARRB1,SCARB2,DNM1,DNM2,HBEGF,CTTN,EREG,AGFG1,LDLR,LRP2,PIK3C2A,RAB5A,RAB5C,RPS27A,SH3GL1,SH3GL3,TFRC,STAM,FZD4,COPS3,HGS,ARPC5,ARPC4,COPS5,PACSIN2,AAK1,EPN2,SYT11,DNM3,SH3KBP1,NECAP2,SYT8,SNX18
13_Member	Reactome Gene Sets	R-HSA-8856825	Cargo recognition for clathrin-mediated endocytosis	-4.1124	-3.48771	10/106	161,163,950,3267,6233,7037,8533,9146,22848,55707	AP2A2,AP2B1,SCARB2,AGFG1,RPS27A,TFRC,COPS3,HGS,AAK1,NECAP2
14_Summary	Reactome Gene Sets	R-HSA-1566948	Elastic fibre formation	-14.93	-13.0403	27/45	652,2192,2199,2200,2201,2335,3678,3685,3688,3690,3693,3696,4015,4052,4053,4054,4236,7040,7042,7043,8076,8425,10516,11117,84034,84171,84695	BMP4,FBLN1,FBLN2,FBN1,FBN2,FN1,ITGA5,ITGAV,ITGB1,ITGB3,ITGB5,ITGB8,LOX,LTBP1,LTBP2,LTBP3,MFAP1,TGFB1,TGFB2,TGFB3,MFAP5,LTBP4,FBLN5,EMILIN1,EMILIN2,LOXL4,LOXL3
14_Member	Reactome Gene Sets	R-HSA-1566948	Elastic fibre formation	-14.93	-13.0403	27/45	652,2192,2199,2200,2201,2335,3678,3685,3688,3690,3693,3696,4015,4052,4053,4054,4236,7040,7042,7043,8076,8425,10516,11117,84034,84171,84695	BMP4,FBLN1,FBLN2,FBN1,FBN2,FN1,ITGA5,ITGAV,ITGB1,ITGB3,ITGB5,ITGB8,LOX,LTBP1,LTBP2,LTBP3,MFAP1,TGFB1,TGFB2,TGFB3,MFAP5,LTBP4,FBLN5,EMILIN1,EMILIN2,LOXL4,LOXL3
14_Member	Reactome Gene Sets	R-HSA-2129379	Molecules associated with elastic fibres	-12.9252	-11.1432	23/38	652,2192,2199,2200,2201,2335,3685,3688,3690,3693,3696,4052,4053,4054,4236,7040,7042,7043,8076,8425,10516,11117,84034	BMP4,FBLN1,FBLN2,FBN1,FBN2,FN1,ITGAV,ITGB1,ITGB3,ITGB5,ITGB8,LTBP1,LTBP2,LTBP3,MFAP1,TGFB1,TGFB2,TGFB3,MFAP5,LTBP4,FBLN5,EMILIN1,EMILIN2
15_Summary	Reactome Gene Sets	R-HSA-381426	Regulation of Insulin-like Growth Factor (IGF) transport and uptake by Insulin-like Growth Factor Binding Proteins (IGFBPs)	-14.7472	-12.8839	47/125	174,338,348,652,718,813,1356,1435,1462,1758,2200,2335,2519,2621,3371,3479,3486,3487,3489,3490,3491,3895,3912,3915,3956,4052,4313,4924,5034,5069,5768,5954,6383,6696,7076,7184,8542,10130,10232,10970,11167,54757,54972,56975,60676,91851,375056	AFP,APOB,APOE,BMP4,C3,CALU,CP,CSF1,VCAN,DMP1,FBN1,FN1,FUCA2,GAS6,TNC,IGF1,IGFBP3,IGFBP4,IGFBP6,IGFBP7,CCN1,KTN1,LAMB1,LAMC1,LGALS1,LTBP1,MMP2,NUCB1,P4HB,PAPPA,QSOX1,RCN1,SDC2,SPP1,TIMP1,HSP90B1,APOL1,PDIA6,MSLN,CKAP4,FSTL1,FAM20A,TMEM132A,FAM20C,PAPPA2,CHRDL1,MIA3
15_Member	Reactome Gene Sets	R-HSA-381426	Regulation of Insulin-like Growth Factor (IGF) transport and uptake by Insulin-like Growth Factor Binding Proteins (IGFBPs)	-14.7472	-12.8839	47/125	174,338,348,652,718,813,1356,1435,1462,1758,2200,2335,2519,2621,3371,3479,3486,3487,3489,3490,3491,3895,3912,3915,3956,4052,4313,4924,5034,5069,5768,5954,6383,6696,7076,7184,8542,10130,10232,10970,11167,54757,54972,56975,60676,91851,375056	AFP,APOB,APOE,BMP4,C3,CALU,CP,CSF1,VCAN,DMP1,FBN1,FN1,FUCA2,GAS6,TNC,IGF1,IGFBP3,IGFBP4,IGFBP6,IGFBP7,CCN1,KTN1,LAMB1,LAMC1,LGALS1,LTBP1,MMP2,NUCB1,P4HB,PAPPA,QSOX1,RCN1,SDC2,SPP1,TIMP1,HSP90B1,APOL1,PDIA6,MSLN,CKAP4,FSTL1,FAM20A,TMEM132A,FAM20C,PAPPA2,CHRDL1,MIA3
15_Member	Reactome Gene Sets	R-HSA-8957275	Post-translational protein phosphorylation	-13.8531	-12.0146	42/108	174,338,348,652,718,813,1356,1435,1462,1758,2200,2335,2519,2621,3371,3486,3487,3490,3491,3895,3912,3915,3956,4052,4924,5034,5768,5954,6383,6696,7076,7184,8542,10130,10232,10970,11167,54757,54972,56975,91851,375056	AFP,APOB,APOE,BMP4,C3,CALU,CP,CSF1,VCAN,DMP1,FBN1,FN1,FUCA2,GAS6,TNC,IGFBP3,IGFBP4,IGFBP7,CCN1,KTN1,LAMB1,LAMC1,LGALS1,LTBP1,NUCB1,P4HB,QSOX1,RCN1,SDC2,SPP1,TIMP1,HSP90B1,APOL1,PDIA6,MSLN,CKAP4,FSTL1,FAM20A,TMEM132A,FAM20C,CHRDL1,MIA3
16_Summary	Reactome Gene Sets	R-HSA-163200	Respiratory electron transport, ATP synthesis by chemiosmotic coupling, and heat production by uncoupling proteins.	-14.6552	-13.2146	23/127	515,521,1327,1340,2109,4695,4697,4702,4705,4710,4716,4720,4722,4723,4728,4729,9377,9551,9997,10128,10476,10632,55967,682,23530,728294	ATP5PB,ATP5ME,COX4I1,COX6B1,ETFB,NDUFA2,NDUFA4,NDUFA8,NDUFA10,NDUFB4,NDUFB10,NDUFS2,NDUFS3,NDUFV1,NDUFS8,NDUFV2,COX5A,ATP5MF,SCO2,LRPPRC,ATP5PD,ATP5MG,NDUFA12,BSG,NNT,D2HGDH
16_Member	Reactome Gene Sets	R-HSA-163200	Respiratory electron transport, ATP synthesis by chemiosmotic coupling, and heat production by uncoupling proteins.	-14.6552	-13.2146	23/127	515,521,1327,1340,2109,4695,4697,4702,4705,4710,4716,4720,4722,4723,4728,4729,9377,9551,9997,10128,10476,10632,55967	ATP5PB,ATP5ME,COX4I1,COX6B1,ETFB,NDUFA2,NDUFA4,NDUFA8,NDUFA10,NDUFB4,NDUFB10,NDUFS2,NDUFS3,NDUFV1,NDUFS8,NDUFV2,COX5A,ATP5MF,SCO2,LRPPRC,ATP5PD,ATP5MG,NDUFA12
16_Member	Reactome Gene Sets	R-HSA-1428517	The citric acid (TCA) cycle and respiratory electron transport	-14.1364	-12.7416	26/178	515,521,682,1327,1340,2109,4695,4697,4702,4705,4710,4716,4720,4722,4723,4728,4729,9377,9551,9997,10128,10476,10632,23530,55967,728294	ATP5PB,ATP5ME,BSG,COX4I1,COX6B1,ETFB,NDUFA2,NDUFA4,NDUFA8,NDUFA10,NDUFB4,NDUFB10,NDUFS2,NDUFS3,NDUFV1,NDUFS8,NDUFV2,COX5A,ATP5MF,SCO2,LRPPRC,ATP5PD,ATP5MG,NNT,NDUFA12,D2HGDH
16_Member	Reactome Gene Sets	R-HSA-611105	Respiratory electron transport	-11.3313	-10.0732	18/103	1327,1340,2109,4695,4697,4702,4705,4710,4716,4720,4722,4723,4728,4729,9377,9997,10128,55967	COX4I1,COX6B1,ETFB,NDUFA2,NDUFA4,NDUFA8,NDUFA10,NDUFB4,NDUFB10,NDUFS2,NDUFS3,NDUFV1,NDUFS8,NDUFV2,COX5A,SCO2,LRPPRC,NDUFA12
16_Member	Reactome Gene Sets	R-HSA-6799198	Complex I biogenesis	-7.63484	-6.59415	11/57	4695,4702,4705,4710,4716,4720,4722,4723,4728,4729,55967	NDUFA2,NDUFA8,NDUFA10,NDUFB4,NDUFB10,NDUFS2,NDUFS3,NDUFV1,NDUFS8,NDUFV2,NDUFA12
17_Summary	Reactome Gene Sets	R-HSA-8948216	Collagen chain trimerization	-14.5493	-13.1197	13/44	1277,1278,1282,1284,1288,1289,1290,1291,1292,1293,1303,1307,7373,338,811,1281,2495,5648,7184,81035,286133,949,6678,8542,23166,3909,4015,7837,84171,84695	COL1A1,COL1A2,COL4A1,COL4A2,COL4A6,COL5A1,COL5A2,COL6A1,COL6A2,COL6A3,COL12A1,COL16A1,COL14A1,APOB,CALR,COL3A1,FTH1,MASP1,HSP90B1,COLEC12,SCARA5,SCARB1,SPARC,APOL1,STAB1,LAMA3,LOX,PXDN,LOXL4,LOXL3
17_Member	Reactome Gene Sets	R-HSA-8948216	Collagen chain trimerization	-14.5493	-13.1197	13/44	1277,1278,1282,1284,1288,1289,1290,1291,1292,1293,1303,1307,7373	COL1A1,COL1A2,COL4A1,COL4A2,COL4A6,COL5A1,COL5A2,COL6A1,COL6A2,COL6A3,COL12A1,COL16A1,COL14A1
17_Member	Reactome Gene Sets	R-HSA-1442490	Collagen degradation	-12.2388	-10.9443	13/64	1277,1278,1282,1284,1288,1289,1290,1291,1292,1293,1303,1307,7373	COL1A1,COL1A2,COL4A1,COL4A2,COL4A6,COL5A1,COL5A2,COL6A1,COL6A2,COL6A3,COL12A1,COL16A1,COL14A1
17_Member	Reactome Gene Sets	R-HSA-3000480	Scavenging by Class A Receptors	-11.1372	-9.89164	12/19	338,811,1277,1278,1281,1282,1284,2495,5648,7184,81035,286133	APOB,CALR,COL1A1,COL1A2,COL3A1,COL4A1,COL4A2,FTH1,MASP1,HSP90B1,COLEC12,SCARA5
17_Member	Reactome Gene Sets	R-HSA-2173782	Binding and Uptake of Ligands by Scavenger Receptors	-10.2504	-9.0317	16/42	338,811,949,1277,1278,1281,1282,1284,2495,5648,6678,7184,8542,23166,81035,286133	APOB,CALR,SCARB1,COL1A1,COL1A2,COL3A1,COL4A1,COL4A2,FTH1,MASP1,SPARC,HSP90B1,APOL1,STAB1,COLEC12,SCARA5
17_Member	Reactome Gene Sets	R-HSA-2214320	Anchoring fibril formation	-7.90676	-6.84842	6/15	1277,1278,1282,1284,1288,3909	COL1A1,COL1A2,COL4A1,COL4A2,COL4A6,LAMA3
17_Member	Reactome Gene Sets	R-HSA-2243919	Crosslinking of collagen fibrils	-7.25964	-6.25223	9/18	1277,1278,1282,1284,1288,4015,7837,84171,84695	COL1A1,COL1A2,COL4A1,COL4A2,COL4A6,LOX,PXDN,LOXL4,LOXL3
18_Summary	Reactome Gene Sets	R-HSA-191273	Cholesterol biosynthesis	-13.6426	-12.2649	15/25	39,1595,1717,2224,3156,3157,3422,4047,4598,6307,6309,6713,10654,50814,51478,6667,10498,79071,85441,9871,6342,7421,9023,9971,114880	ACAT2,CYP51A1,DHCR7,FDPS,HMGCR,HMGCS1,IDI1,LSS,MVK,MSMO1,SC5D,SQLE,PMVK,NSDHL,HSD17B7,SP1,CARM1,ELOVL6,HELZ2,SEC24D,SCP2,VDR,CH25H,NR1H4,OSBPL6
18_Member	Reactome Gene Sets	R-HSA-191273	Cholesterol biosynthesis	-13.6426	-12.2649	15/25	39,1595,1717,2224,3156,3157,3422,4047,4598,6307,6309,6713,10654,50814,51478	ACAT2,CYP51A1,DHCR7,FDPS,HMGCR,HMGCS1,IDI1,LSS,MVK,MSMO1,SC5D,SQLE,PMVK,NSDHL,HSD17B7
18_Member	Reactome Gene Sets	R-HSA-2426168	Activation of gene expression by SREBF (SREBP)	-9.49026	-8.31556	15/42	1595,1717,2224,3156,3157,3422,4047,4598,6309,6667,6713,10498,10654,79071,85441	CYP51A1,DHCR7,FDPS,HMGCR,HMGCS1,IDI1,LSS,MVK,SC5D,SP1,SQLE,CARM1,PMVK,ELOVL6,HELZ2
18_Member	Reactome Gene Sets	R-HSA-1655829	Regulation of cholesterol biosynthesis by SREBP (SREBF)	-8.57776	-7.45248	16/55	1595,1717,2224,3156,3157,3422,4047,4598,6309,6667,6713,9871,10498,10654,79071,85441	CYP51A1,DHCR7,FDPS,HMGCR,HMGCS1,IDI1,LSS,MVK,SC5D,SP1,SQLE,SEC24D,CARM1,PMVK,ELOVL6,HELZ2
18_Member	Reactome Gene Sets	R-HSA-8957322	Metabolism of steroids	-7.41459	-6.4	25/151	39,1595,1717,2224,3156,3157,3422,4047,4598,6307,6309,6342,6667,6713,7421,9023,9871,9971,10498,10654,50814,51478,79071,85441,114880	ACAT2,CYP51A1,DHCR7,FDPS,HMGCR,HMGCS1,IDI1,LSS,MVK,MSMO1,SC5D,SCP2,SP1,SQLE,VDR,CH25H,SEC24D,NR1H4,CARM1,PMVK,NSDHL,HSD17B7,ELOVL6,HELZ2,OSBPL6
19_Summary	Reactome Gene Sets	R-HSA-5663202	Diseases of signal transduction by growth factor receptors and second messengers	-13.3377	-11.5227	100/433	60,391,408,598,805,815,817,833,941,1499,1639,1839,1850,1852,2069,2247,2250,2252,2255,2260,2263,2280,2335,2804,2932,3065,3066,3082,3516,3690,3714,4000,4008,4041,4067,4233,4254,4478,4609,4627,4851,4869,5154,5155,5156,5159,5291,5295,5431,5435,5573,5595,5664,5686,5698,5707,5709,5720,5879,5903,5908,6194,6233,6238,6711,6774,7040,7048,7094,7170,7171,7414,8322,8323,8454,8496,8503,8826,8878,9148,9208,9321…	ACTB,RHOG,ARRB1,BCL2L1,CALM2,CAMK2A,CAMK2D,CARS1,CD80,CTNNB1,DCTN1,HBEGF,DUSP8,DUSP9,EREG,FGF2,FGF5,FGF7,FGF10,FGFR1,FGFR2,FKBP1A,FN1,GOLGB1,GSK3B,HDAC1,HDAC2,HGF,RBPJ,ITGB3,JAG2,LMNA,LMO7,LRP5,LYN,MET,KITLG,MSN,MYC,MYH9,NOTCH1,NPM1,PDGFA,PDGFB,PDGFRA,PDGFRB,PIK3CB,PIK3R1,POLR2B,POLR2F,PRKAR1A,MAPK3,PSEN2,PSMA5,PSMB9,PSMD1,PSMD3,PSME1,RAC1,RANBP2,RAP1B,RPS6,RPS27A,RRBP1,SPTBN1,STAT3,TGFB1,TGFBR2,…
19_Member	Reactome Gene Sets	R-HSA-5663202	Diseases of signal transduction by growth factor receptors and second messengers	-13.3377	-11.5227	100/433	60,391,408,598,805,815,817,833,941,1499,1639,1839,1850,1852,2069,2247,2250,2252,2255,2260,2263,2280,2335,2804,2932,3065,3066,3082,3516,3690,3714,4000,4008,4041,4067,4233,4254,4478,4609,4627,4851,4869,5154,5155,5156,5159,5291,5295,5431,5435,5573,5595,5664,5686,5698,5707,5709,5720,5879,5903,5908,6194,6233,6238,6711,6774,7040,7048,7094,7170,7171,7414,8322,8323,8454,8496,8503,8826,8878,9148,9208,9321…	ACTB,RHOG,ARRB1,BCL2L1,CALM2,CAMK2A,CAMK2D,CARS1,CD80,CTNNB1,DCTN1,HBEGF,DUSP8,DUSP9,EREG,FGF2,FGF5,FGF7,FGF10,FGFR1,FGFR2,FKBP1A,FN1,GOLGB1,GSK3B,HDAC1,HDAC2,HGF,RBPJ,ITGB3,JAG2,LMNA,LMO7,LRP5,LYN,MET,KITLG,MSN,MYC,MYH9,NOTCH1,NPM1,PDGFA,PDGFB,PDGFRA,PDGFRB,PIK3CB,PIK3R1,POLR2B,POLR2F,PRKAR1A,MAPK3,PSEN2,PSMA5,PSMB9,PSMD1,PSMD3,PSME1,RAC1,RANBP2,RAP1B,RPS6,RPS27A,RRBP1,SPTBN1,STAT3,TGFB1,TGFBR2,…
19_Member	Reactome Gene Sets	R-HSA-5683057	MAPK family signaling cascades	-11.4402	-9.79354	78/325	60,284,402,408,598,805,815,817,983,998,1741,1839,1843,1846,1847,1850,1852,2069,2118,2247,2250,2252,2255,2260,2263,2335,2668,2674,3082,3337,3690,3716,4233,4254,4343,4609,4684,5058,5154,5155,5156,5159,5291,5295,5567,5595,5596,5686,5698,5707,5709,5720,5774,5879,5908,5979,6233,6300,6711,7094,7297,7414,8682,8826,8997,9542,10197,10256,10602,10642,10818,11221,22821,23179,25759,54756,80824,152559	ACTB,ANGPT1,ARL2,ARRB1,BCL2L1,CALM2,CAMK2A,CAMK2D,CDK1,CDC42,DLG3,HBEGF,DUSP1,DUSP4,DUSP5,DUSP8,DUSP9,EREG,ETV4,FGF2,FGF5,FGF7,FGF10,FGFR1,FGFR2,FN1,GDNF,GFRA1,HGF,DNAJB1,ITGB3,JAK1,MET,KITLG,MOV10,MYC,NCAM1,PAK1,PDGFA,PDGFB,PDGFRA,PDGFRB,PIK3CB,PIK3R1,PRKACB,MAPK3,MAPK4,PSMA5,PSMB9,PSMD1,PSMD3,PSME1,PTPN3,RAC1,RAP1B,RET,RPS27A,MAPK12,SPTBN1,TLN1,TYK2,VCL,PEA15,IQGAP1,KALRN,NRG2,PSME3,CNKSR1,CDC4…
19_Member	Reactome Gene Sets	R-HSA-9006925	Intracellular signaling by second messengers	-10.4106	-8.86703	73/309	107,109,113,115,391,805,815,817,941,1107,1108,1839,2069,2247,2250,2252,2255,2260,2263,2444,2932,3065,3066,3082,3556,3709,3710,3838,4233,4254,4343,5137,5153,5154,5155,5156,5159,5291,5295,5371,5468,5567,5573,5580,5595,5686,5698,5707,5709,5720,5879,5928,5931,6233,6591,6615,7874,8395,8503,8870,9173,9542,10197,10273,10670,10768,10818,11060,23239,57459,58528,64121,80243	ADCY1,ADCY3,ADCY7,ADCY9,RHOG,CALM2,CAMK2A,CAMK2D,CD80,CHD3,CHD4,HBEGF,EREG,FGF2,FGF5,FGF7,FGF10,FGFR1,FGFR2,FRK,GSK3B,HDAC1,HDAC2,HGF,IL1RAP,ITPR2,ITPR3,KPNA2,MET,KITLG,MOV10,PDE1C,PDE1B,PDGFA,PDGFB,PDGFRA,PDGFRB,PIK3CB,PIK3R1,PML,PPARG,PRKACB,PRKAR1A,PRKCD,MAPK3,PSMA5,PSMB9,PSMD1,PSMD3,PSME1,RAC1,RBBP4,RBBP7,RPS27A,SNAI2,SNAI1,USP7,PIP5K1B,PIK3R3,IER3,IL1RL1,NRG2,PSME3,STUB1,RRAGA,AHCYL1,FRS2,WW…
19_Member	Reactome Gene Sets	R-HSA-5684996	MAPK1/MAPK3 signaling	-9.02933	-7.58877	66/286	60,284,402,408,598,805,815,817,983,1741,1839,1843,1846,1847,1850,1852,2069,2247,2250,2252,2255,2260,2263,2335,2668,2674,3082,3690,3716,4233,4254,4684,5154,5155,5156,5159,5291,5295,5595,5686,5698,5707,5709,5720,5774,5908,5979,6233,6300,6711,7094,7297,7414,8682,8826,9542,10197,10256,10818,11221,22821,23179,25759,54756,80824,152559	ACTB,ANGPT1,ARL2,ARRB1,BCL2L1,CALM2,CAMK2A,CAMK2D,CDK1,DLG3,HBEGF,DUSP1,DUSP4,DUSP5,DUSP8,DUSP9,EREG,FGF2,FGF5,FGF7,FGF10,FGFR1,FGFR2,FN1,GDNF,GFRA1,HGF,ITGB3,JAK1,MET,KITLG,NCAM1,PDGFA,PDGFB,PDGFRA,PDGFRB,PIK3CB,PIK3R1,MAPK3,PSMA5,PSMB9,PSMD1,PSMD3,PSME1,PTPN3,RAP1B,RET,RPS27A,MAPK12,SPTBN1,TLN1,TYK2,VCL,PEA15,IQGAP1,NRG2,PSME3,CNKSR1,FRS2,DUSP10,RASA3,RGL1,SHC2,IL17RD,DUSP16,PAQR3
19_Member	Reactome Gene Sets	R-HSA-5673001	RAF/MAP kinase cascade	-8.60138	-7.18885	64/280	60,284,402,408,598,805,815,817,1741,1839,1843,1846,1847,1850,1852,2069,2247,2250,2252,2255,2260,2263,2335,2668,2674,3082,3690,3716,4233,4254,4684,5154,5155,5156,5159,5291,5295,5595,5686,5698,5707,5709,5720,5774,5908,5979,6233,6300,6711,7094,7414,8682,8826,9542,10197,10256,10818,11221,22821,23179,25759,54756,80824,152559	ACTB,ANGPT1,ARL2,ARRB1,BCL2L1,CALM2,CAMK2A,CAMK2D,DLG3,HBEGF,DUSP1,DUSP4,DUSP5,DUSP8,DUSP9,EREG,FGF2,FGF5,FGF7,FGF10,FGFR1,FGFR2,FN1,GDNF,GFRA1,HGF,ITGB3,JAK1,MET,KITLG,NCAM1,PDGFA,PDGFB,PDGFRA,PDGFRB,PIK3CB,PIK3R1,MAPK3,PSMA5,PSMB9,PSMD1,PSMD3,PSME1,PTPN3,RAP1B,RET,RPS27A,MAPK12,SPTBN1,TLN1,VCL,PEA15,IQGAP1,NRG2,PSME3,CNKSR1,FRS2,DUSP10,RASA3,RGL1,SHC2,IL17RD,DUSP16,PAQR3
19_Member	Reactome Gene Sets	R-HSA-1257604	PIP3 activates AKT signaling	-6.6596	-5.38207	57/267	391,941,1107,1108,1839,2069,2247,2250,2252,2255,2260,2263,2444,2932,3065,3066,3082,3556,4233,4254,4343,5154,5155,5156,5159,5291,5295,5371,5468,5595,5686,5698,5707,5709,5720,5879,5928,5931,6233,6591,6615,7874,8395,8503,8870,9173,9542,10197,10273,10670,10818,11060,23239,57459,58528,64121,80243	RHOG,CD80,CHD3,CHD4,HBEGF,EREG,FGF2,FGF5,FGF7,FGF10,FGFR1,FGFR2,FRK,GSK3B,HDAC1,HDAC2,HGF,IL1RAP,MET,KITLG,MOV10,PDGFA,PDGFB,PDGFRA,PDGFRB,PIK3CB,PIK3R1,PML,PPARG,MAPK3,PSMA5,PSMB9,PSMD1,PSMD3,PSME1,RAC1,RBBP4,RBBP7,RPS27A,SNAI2,SNAI1,USP7,PIP5K1B,PIK3R3,IER3,IL1RL1,NRG2,PSME3,STUB1,RRAGA,FRS2,WWP2,PHLPP1,GATAD2B,RRAGD,RRAGC,PREX2
19_Member	Reactome Gene Sets	R-HSA-199418	Negative regulation of the PI3K/AKT network	-5.47826	-4.66438	17/113	2069,2247,2250,2255,2260,3082,4254,5154,5155,5156,5295,8395,8503,8870,9173,9542,23239	EREG,FGF2,FGF5,FGF10,FGFR1,HGF,KITLG,PDGFA,PDGFB,PDGFRA,PIK3R1,PIP5K1B,PIK3R3,IER3,IL1RL1,NRG2,PHLPP1
19_Member	Reactome Gene Sets	R-HSA-2219530	Constitutive Signaling by Aberrant PI3K in Cancer	-5.41687	-4.2576	23/78	391,941,1839,2069,2247,2250,2252,2255,2260,2263,3082,4233,4254,5154,5155,5156,5159,5291,5295,5879,8503,9542,10818	RHOG,CD80,HBEGF,EREG,FGF2,FGF5,FGF7,FGF10,FGFR1,FGFR2,HGF,MET,KITLG,PDGFA,PDGFB,PDGFRA,PDGFRB,PIK3CB,PIK3R1,RAC1,PIK3R3,NRG2,FRS2
19_Member	Reactome Gene Sets	R-HSA-6811558	PI5P, PP2A and IER3 Regulate PI3K/AKT Signaling	-5.4001	-4.24334	28/106	391,941,1839,2069,2247,2250,2252,2255,2260,2263,3082,3556,4233,4254,5154,5155,5156,5159,5291,5295,5595,5879,8395,8503,8870,9173,9542,10818	RHOG,CD80,HBEGF,EREG,FGF2,FGF5,FGF7,FGF10,FGFR1,FGFR2,HGF,IL1RAP,MET,KITLG,PDGFA,PDGFB,PDGFRA,PDGFRB,PIK3CB,PIK3R1,MAPK3,RAC1,PIP5K1B,PIK3R3,IER3,IL1RL1,NRG2,FRS2
19_Member	Reactome Gene Sets	R-HSA-2219528	PI3K/AKT Signaling in Cancer	-3.7137	-2.76657	24/104	391,941,1839,2069,2247,2250,2252,2255,2260,2263,2932,3082,4233,4254,5154,5155,5156,5159,5291,5295,5879,8503,9542,10818	RHOG,CD80,HBEGF,EREG,FGF2,FGF5,FGF7,FGF10,FGFR1,FGFR2,GSK3B,HGF,MET,KITLG,PDGFA,PDGFB,PDGFRA,PDGFRB,PIK3CB,PIK3R1,RAC1,PIK3R3,NRG2,FRS2
19_Member	Reactome Gene Sets	R-HSA-6807070	PTEN Regulation	-3.13068	-2.26222	28/140	1107,1108,2444,3065,3066,4343,5371,5468,5595,5686,5698,5707,5709,5720,5928,5931,6233,6591,6615,7874,10197,10273,10670,11060,57459,58528,64121,80243	CHD3,CHD4,FRK,HDAC1,HDAC2,MOV10,PML,PPARG,MAPK3,PSMA5,PSMB9,PSMD1,PSMD3,PSME1,RBBP4,RBBP7,RPS27A,SNAI2,SNAI1,USP7,PSME3,STUB1,RRAGA,WWP2,GATAD2B,RRAGD,RRAGC,PREX2
20_Summary	Reactome Gene Sets	R-HSA-397014	Muscle contraction	-13.1277	-11.324	59/197	59,72,301,302,444,481,483,488,489,493,775,782,800,805,815,817,1756,1760,2259,2626,2977,3672,3693,3709,3710,3750,3759,3776,4637,4638,4881,4882,5058,6262,6263,6324,6328,6331,6546,6717,7094,7139,7168,7169,7170,7171,7220,7414,7431,8291,8645,10580,10768,29766,29767,30818,59284,80228,103910	ACTA2,ACTG2,ANXA1,ANXA2,ASPH,ATP1B1,ATP1B3,ATP2A2,ATP2A3,ATP2B4,CACNA1C,CACNB1,CALD1,CALM2,CAMK2A,CAMK2D,DMD,DMPK,FGF14,GATA4,GUCY1A2,ITGA1,ITGB5,ITPR2,ITPR3,KCND1,KCNJ2,KCNK2,MYL6,MYLK,NPR1,NPR2,PAK1,RYR2,RYR3,SCN1B,SCN3A,SCN5A,SLC8A1,SRI,TLN1,TNNT2,TPM1,TPM2,TPM3,TPM4,TRPC1,VCL,VIM,DYSF,KCNK5,SORBS1,AHCYL1,TMOD3,TMOD2,KCNIP3,CACNG7,ORAI2,MYL12B
20_Member	Reactome Gene Sets	R-HSA-397014	Muscle contraction	-13.1277	-11.324	59/197	59,72,301,302,444,481,483,488,489,493,775,782,800,805,815,817,1756,1760,2259,2626,2977,3672,3693,3709,3710,3750,3759,3776,4637,4638,4881,4882,5058,6262,6263,6324,6328,6331,6546,6717,7094,7139,7168,7169,7170,7171,7220,7414,7431,8291,8645,10580,10768,29766,29767,30818,59284,80228,103910	ACTA2,ACTG2,ANXA1,ANXA2,ASPH,ATP1B1,ATP1B3,ATP2A2,ATP2A3,ATP2B4,CACNA1C,CACNB1,CALD1,CALM2,CAMK2A,CAMK2D,DMD,DMPK,FGF14,GATA4,GUCY1A2,ITGA1,ITGB5,ITPR2,ITPR3,KCND1,KCNJ2,KCNK2,MYL6,MYLK,NPR1,NPR2,PAK1,RYR2,RYR3,SCN1B,SCN3A,SCN5A,SLC8A1,SRI,TLN1,TNNT2,TPM1,TPM2,TPM3,TPM4,TRPC1,VCL,VIM,DYSF,KCNK5,SORBS1,AHCYL1,TMOD3,TMOD2,KCNIP3,CACNG7,ORAI2,MYL12B
20_Member	Reactome Gene Sets	R-HSA-5576891	Cardiac conduction	-6.38719	-5.13851	34/129	444,481,483,488,489,493,775,782,805,815,817,1760,2259,2626,3709,3710,3750,3759,3776,4881,4882,6262,6263,6324,6328,6331,6546,6717,7220,8645,10768,30818,59284,80228	ASPH,ATP1B1,ATP1B3,ATP2A2,ATP2A3,ATP2B4,CACNA1C,CACNB1,CALM2,CAMK2A,CAMK2D,DMPK,FGF14,GATA4,ITPR2,ITPR3,KCND1,KCNJ2,KCNK2,NPR1,NPR2,RYR2,RYR3,SCN1B,SCN3A,SCN5A,SLC8A1,SRI,TRPC1,KCNK5,AHCYL1,KCNIP3,CACNG7,ORAI2
20_Member	Reactome Gene Sets	R-HSA-5578775	Ion homeostasis	-5.58006	-4.4001	19/56	444,481,483,488,489,493,805,815,817,1760,3709,3710,6262,6263,6546,6717,7220,10768,80228	ASPH,ATP1B1,ATP1B3,ATP2A2,ATP2A3,ATP2B4,CALM2,CAMK2A,CAMK2D,DMPK,ITPR2,ITPR3,RYR2,RYR3,SLC8A1,SRI,TRPC1,AHCYL1,ORAI2
